# Supplementary material for: Heptaketides from the endophytic fungusPleosporalessp. F46 and their antifungal and cytotoxic activities
Source: Royal Society of Chemistry journal article supplement (doi:10.1039/c9ra01956a), 2019-01-01
Supplement: c9ra01956a1.pdf [file c9ra01956a1.pdf]

# Electronic Supplementary Information (ESI)

## Heptaketides from the Endophytic Fungus *Pleosporales* sp. F46 and Their Antifungal and Cytotoxic Activities

Gang Li,<sup>a</sup> Ke Xu,<sup>b</sup> Wen-Qi Chen,<sup>a</sup> Zhi-Hao Guo,<sup>a</sup> Yu-Tong Liu,<sup>a</sup> Ya-Nan Qiao,<sup>b</sup> Yong Sun,<sup>b</sup> Gang Sun,<sup>a</sup> Xiao-Ping Peng<sup>a</sup> and Hong-Xiang Lou<sup>\*ab</sup>

<sup>a</sup> Department of Natural Medicinal Chemistry and Pharmacognosy, School of Pharmacy, Qingdao University, Qingdao 266021, People's Republic of China.

<sup>b</sup> Department of Natural Product Chemistry, Key Laboratory of Chemical Biology of Ministry of Education, School of Pharmaceutical Sciences, Shandong University, Jinan 250012, People's Republic of China.

\*Corresponding Author:

Tel: +86-531-8838-2012. Fax: +86-531-8838-2019.

E-mail: louhongxiang@sdu.edu.cn (H.-X. Lou).

## TABLE OF CONTENTS

**Figure S1.**  $^1\text{H}$  NMR spectrum (400 MHz) of **1** in  $\text{CDCl}_3$ .

**Figure S2.**  $^{13}\text{C}$  NMR spectrum (100 MHz) of **1** in  $\text{CDCl}_3$ .

**Figure S3.** HSQC spectrum (400 MHz) of **1** in  $\text{CDCl}_3$ .

**Figure S4.** HMBC spectrum (400 MHz) of **1** in  $\text{CDCl}_3$ .

**Figure S5.**  $^1\text{H}$ - $^1\text{H}$  COSY spectrum (400 MHz) of **1** in  $\text{CDCl}_3$ .

**Figure S6.** NOESY spectrum (400 MHz) of **1** in  $\text{CDCl}_3$ .

**Figure S7.** ESIHRMS spectrum of **1**.

**Figure S8.** IR spectrum of **1**.

**Figure S9.**  $^1\text{H}$  NMR spectrum (400 MHz) of **2** in  $\text{CD}_3\text{OD}$ .

**Figure S10.**  $^{13}\text{C}$  NMR spectrum (100 MHz) of **2** in  $\text{CD}_3\text{OD}$ .

**Figure S11.** HSQC spectrum (400 MHz) of **2** in  $\text{CD}_3\text{OD}$ .

**Figure S12.** HMBC spectrum (400 MHz) of **2** in  $\text{CD}_3\text{OD}$ .

**Figure S13.**  $^1\text{H}$ - $^1\text{H}$  COSY spectrum (400 MHz) of **2** in  $\text{CD}_3\text{OD}$ .

**Figure S14.** NOESY spectrum (400 MHz) of **2** in  $\text{CD}_3\text{OD}$ .

**Figure S15.** ESIHRMS spectrum of **2**.

**Figure S16.** IR spectrum of **2**.

**Figure S17.**  $^1\text{H}$  NMR spectrum (600 MHz) of **3** in  $\text{CD}_3\text{OD}$ .

**Figure S18.**  $^{13}\text{C}$  NMR spectrum (150 MHz) of **3** in  $\text{CD}_3\text{OD}$ .

**Figure S19.** HSQC spectrum (600 MHz) of **3** in  $\text{CD}_3\text{OD}$ .

**Figure S20.** HMBC spectrum (600 MHz) of **3** in  $\text{CD}_3\text{OD}$ .

**Figure S21.**  $^1\text{H}$ - $^1\text{H}$  COSY spectrum (600 MHz) of **3** in  $\text{CD}_3\text{OD}$ .

**Figure S22.** NOESY spectrum (600 MHz) of **3** in CD<sub>3</sub>OD.

**Figure S23.** ESIHRMS spectrum of **3**.

**Figure S24.** IR spectrum of **3**.

**Figure S25.** <sup>1</sup>H NMR spectrum (400 MHz) of **4** in CD<sub>3</sub>OD.

**Figure S26.** <sup>13</sup>C NMR spectrum (150 MHz) of **4** in CD<sub>3</sub>OD.

**Figure S27.** HSQC spectrum (600 MHz) of **4** in CD<sub>3</sub>OD.

**Figure S28.** HMBC spectrum (600 MHz) of **4** in CD<sub>3</sub>OD.

**Figure S29.** <sup>1</sup>H-<sup>1</sup>H COSY spectrum (600 MHz) of **4** in CD<sub>3</sub>OD.

**Figure S30.** NOESY spectrum (600 MHz) of **4** in CD<sub>3</sub>OD.

**Figure S31.** ESIHRMS spectrum of **4**.

**Figure S32.** IR spectrum of **4**.

**Figure S33.** <sup>1</sup>H NMR spectrum (400 MHz) of **5** in CD<sub>3</sub>OD.

**Figure S34.** <sup>13</sup>C NMR spectrum (100 MHz) of **5** in CD<sub>3</sub>OD.

**Figure S35.** HSQC spectrum (400 MHz) of **5** in CD<sub>3</sub>OD.

**Figure S36.** HMBC spectrum (400 MHz) of **5** in CD<sub>3</sub>OD.

**Figure S37.** <sup>1</sup>H-<sup>1</sup>H COSY spectrum (400 MHz) of **5** in CD<sub>3</sub>OD.

**Figure S38.** NOESY spectrum (400 MHz) of **5** in CD<sub>3</sub>OD.

**Figure S39.** ESIHRMS spectrum of **5**.

**Figure S40.** IR spectrum of **5**.

**Figure S41.** <sup>1</sup>H NMR spectrum (400 MHz) of **6** in DMSO-*d*<sub>6</sub>.

**Figure S42.** <sup>13</sup>C NMR spectrum (100 MHz) of **6** in DMSO-*d*<sub>6</sub>.

**Figure S43.** HSQC spectrum (400 MHz) of **6** in DMSO-*d*<sub>6</sub>.

**Figure S44.** HMBC spectrum (400 MHz) of **6** in DMSO-*d*<sub>6</sub>.

**Figure S45.** <sup>1</sup>H-<sup>1</sup>H COSY spectrum (400 MHz) of **6** in DMSO-*d*<sub>6</sub>.

**Figure S46.** NOESY spectrum (400 MHz) of **6** in DMSO-*d*<sub>6</sub>.

**Figure S47.** ESIHRMS spectrum of **6**.

**Figure S48.** IR spectrum of **6**.

**Figure S49.** <sup>1</sup>H NMR spectrum (400 MHz) of **7** in DMSO-*d*<sub>6</sub>.

**Figure S50.** <sup>13</sup>C NMR spectrum (100 MHz) of **7** in DMSO-*d*<sub>6</sub>.

**Figure S51.** HSQC spectrum (400 MHz) of **7** in DMSO-*d*<sub>6</sub>.

**Figure S52.** HMBC spectrum (400 MHz) of **7** in DMSO-*d*<sub>6</sub>.

**Figure S53.** <sup>1</sup>H-<sup>1</sup>H COSY spectrum (400 MHz) of **7** in DMSO-*d*<sub>6</sub>.

**Figure S54.** NOESY spectrum (400 MHz) of **7** in DMSO-*d*<sub>6</sub>.

**Figure S55.** ESIHRMS spectrum of **7**.

**Figure S56.** IR spectrum of **7**.

**Figure S57.** <sup>1</sup>H NMR spectrum (400 MHz) of **8** in CD<sub>3</sub>OD.

**Figure S58.** <sup>13</sup>C NMR spectrum (100 MHz) of **8** in CD<sub>3</sub>OD.

**Figure S59.** HSQC spectrum (400 MHz) of **8** in CD<sub>3</sub>OD.

**Figure S60.** HMBC spectrum (400 MHz) of **8** in CD<sub>3</sub>OD.

**Figure S61.** <sup>1</sup>H-<sup>1</sup>H COSY spectrum (400 MHz) of **8** in CD<sub>3</sub>OD.

**Figure S62.** NOESY spectrum (400 MHz) of **8** in CD<sub>3</sub>OD.

**Figure S63.** ESIHRMS spectrum of **8**.

**Figure S64.** IR spectrum of **8**.

**Figure S65.** <sup>1</sup>H NMR spectrum (400 MHz) of **9** in DMSO-*d*<sub>6</sub>.

**Figure S66.**  $^{13}\text{C}$  NMR spectrum (100 MHz) of **9** in  $\text{DMSO-}d_6$ .

**Figure S67.** HSQC spectrum (400 MHz) of **9** in  $\text{DMSO-}d_6$ .

**Figure S68.** HMBC spectrum (400 MHz) of **9** in  $\text{DMSO-}d_6$ .

**Figure S69.**  $^1\text{H-}^1\text{H}$  COSY spectrum (400 MHz) of **9** in  $\text{DMSO-}d_6$ .

**Figure S70.** NOESY spectrum (400 MHz) of **9** in  $\text{DMSO-}d_6$ .

**Figure S71.** ESIHRMS spectrum of **9**.

**Figure S72.** IR spectrum of **9**.

**Figure S73.**  $^1\text{H}$  NMR spectrum (400 MHz) of **10** in  $\text{CD}_3\text{OD}$ .

**Figure S74.**  $^{13}\text{C}$  NMR spectrum (150 MHz) of **10** in  $\text{CD}_3\text{OD}$ .

**Figure S75.** ESIHRMS spectrum of **10**.

**Figure S76.** IR spectrum of **10**.

**Figure S77.**  $^1\text{H}$  NMR spectrum (400 MHz) of **11** in  $\text{CD}_3\text{OD}$ .

**Figure S78.**  $^{13}\text{C}$  NMR spectrum (100 MHz) of **11** in  $\text{CD}_3\text{OD}$ .

**Figure S79.** NOESY spectrum (400 MHz) of **11** in  $\text{CD}_3\text{OD}$ .

**Figure S80.** ESIHRMS spectrum of **11**.

**Figure S81.** IR spectrum of **11**.

**Figure S82.** Experimental (black, solid) and calculated (red, dash) ECD curves of compound **10**.

**Figure S83.** Experimental (black, solid) and calculated (red, dash) ECD curves of compound **11**.

**Figure S84.** LC-ESI-HRMS analysis of the crude extract of endophytic fungus *Pleosporales* sp. F46.

**Table S1.** The antifungal and cytotoxic activities of compounds **1-11**.

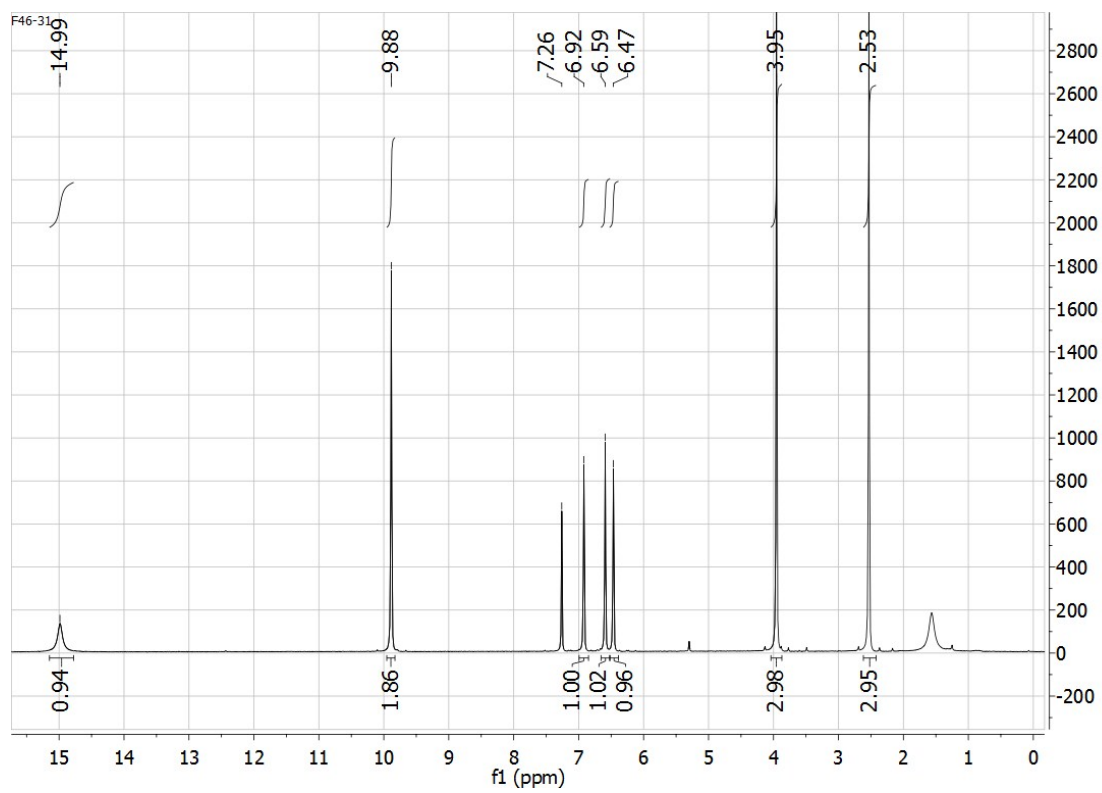

**Figure S1.** <sup>1</sup>H NMR spectrum (400 MHz) of **1** in CDCl<sub>3</sub>.

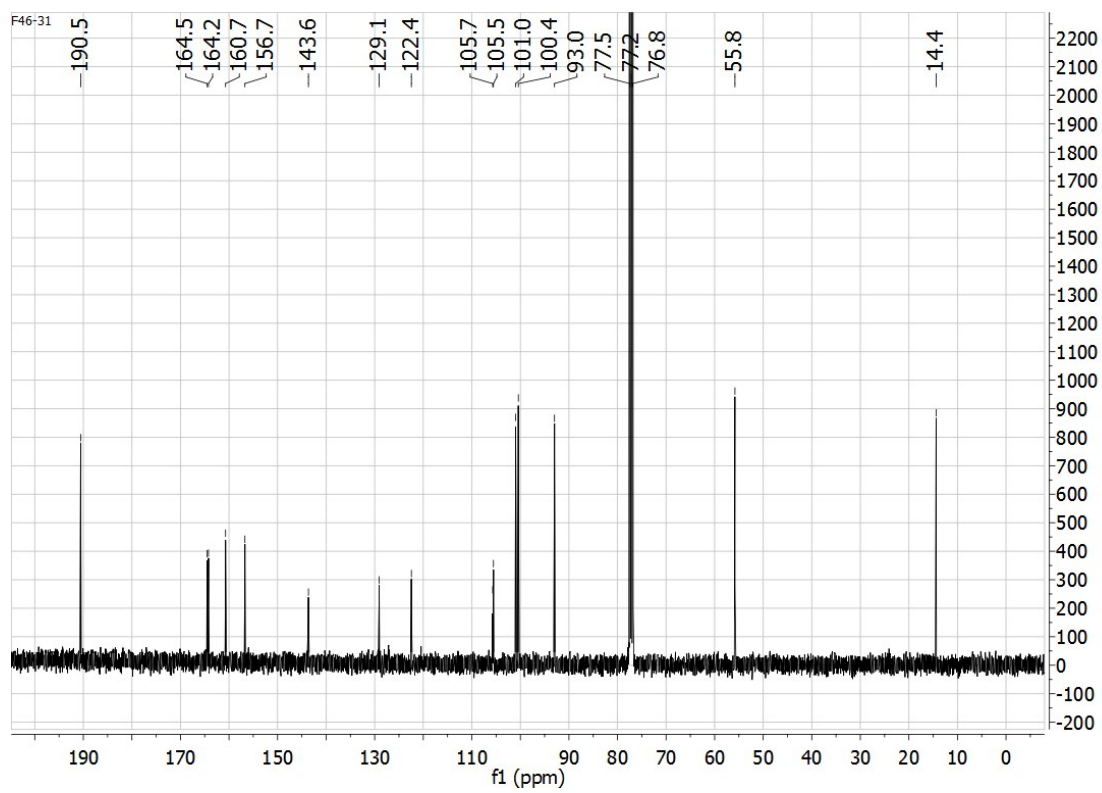

**Figure S2.** <sup>13</sup>C NMR spectrum (100 MHz) of **1** in CDCl<sub>3</sub>.

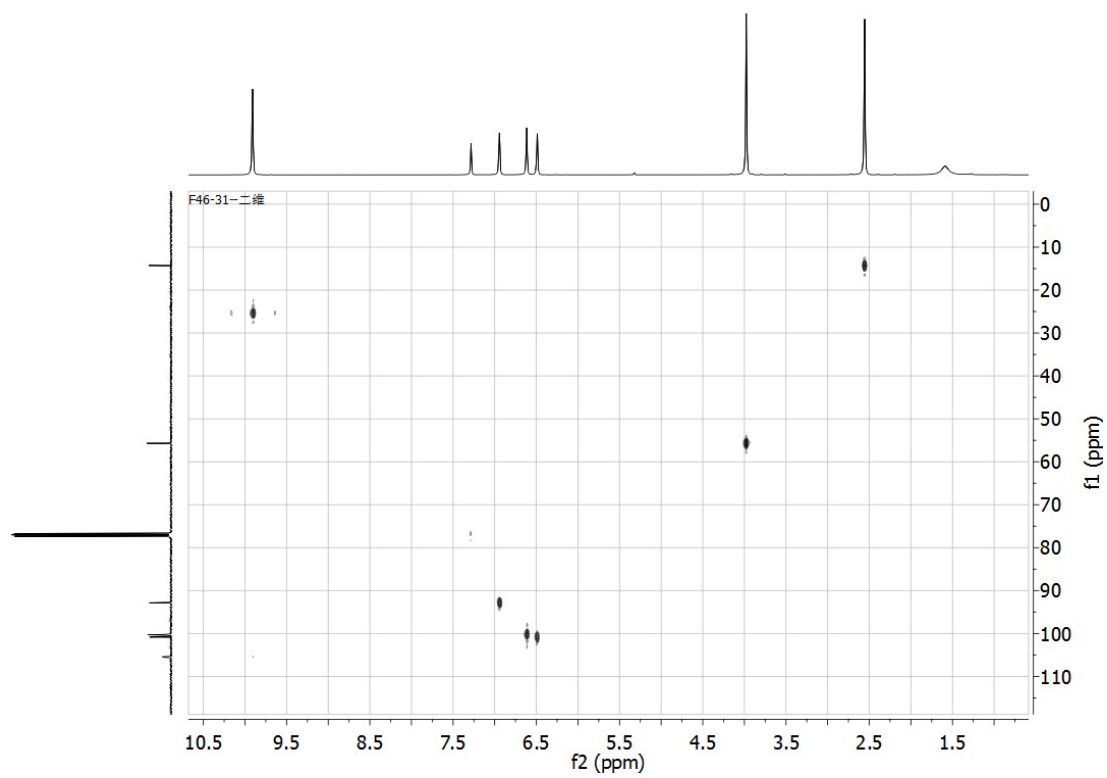

**Figure S3.** HSQC spectrum (400 MHz) of **1** in  $\text{CDCl}_3$ .



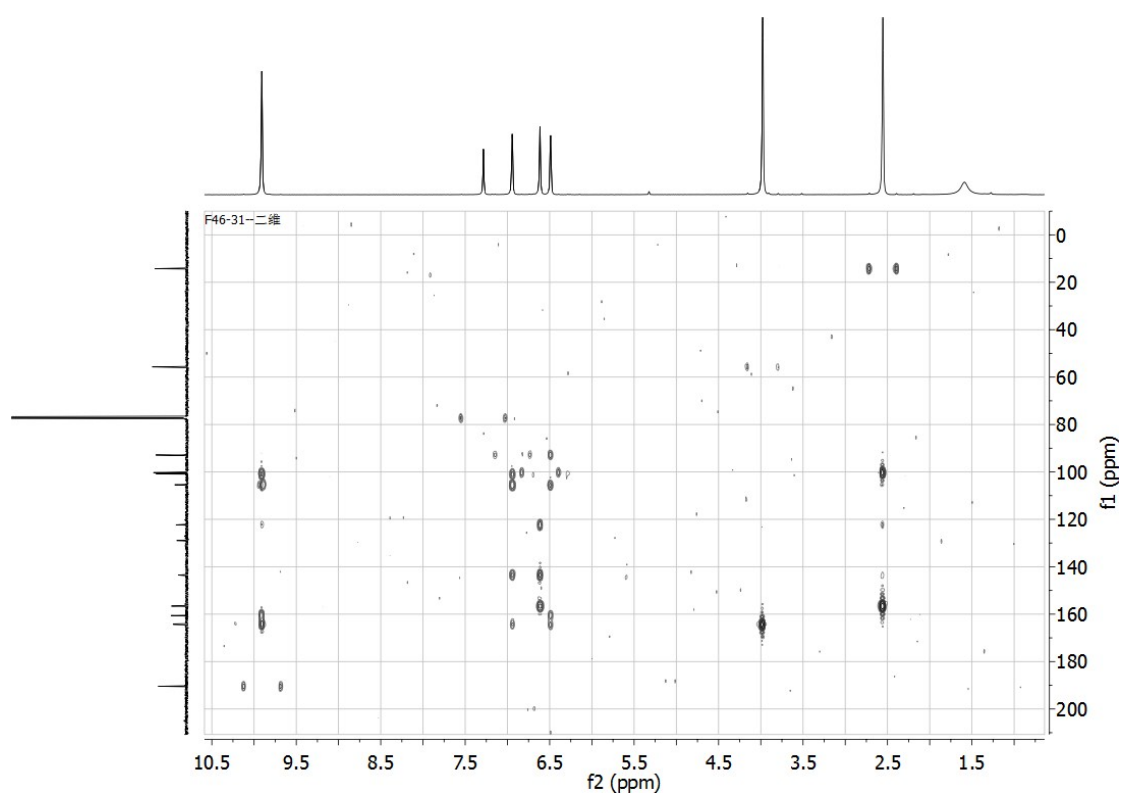

**Figure S4.** HMBC spectrum (400 MHz) of **1** in  $\text{CDCl}_3$ .

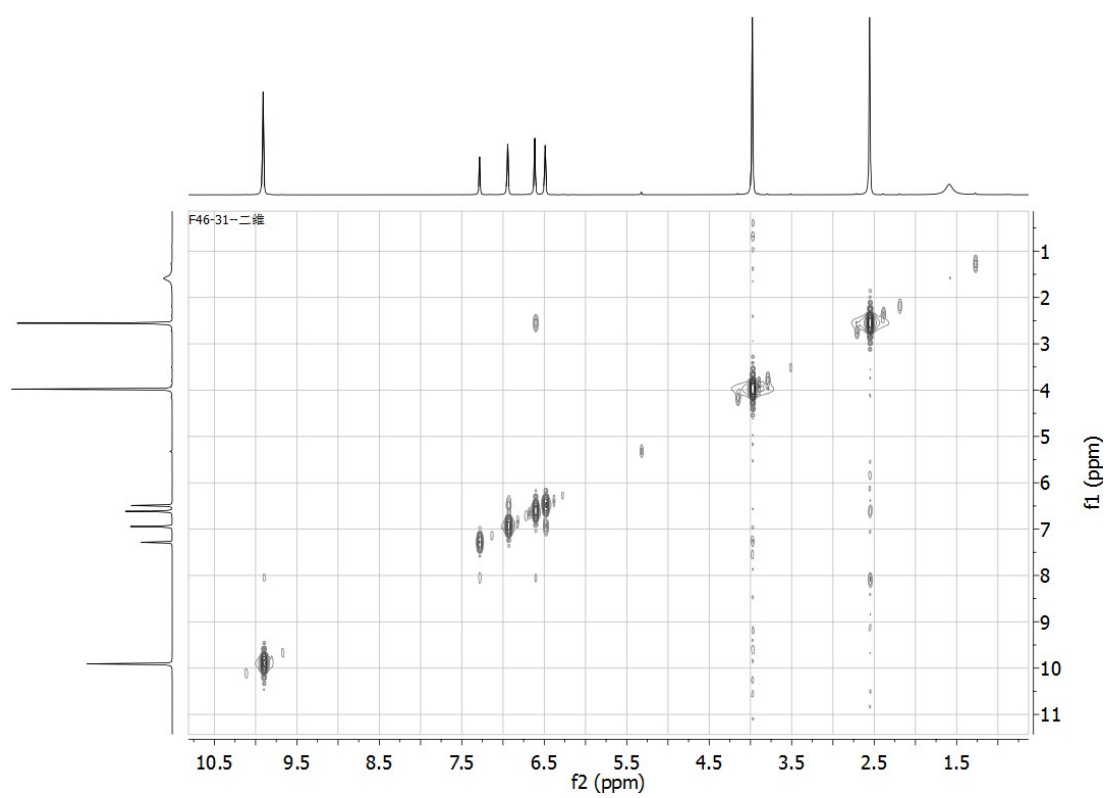

**Figure S5.**  $^1\text{H}$ - $^1\text{H}$  COSY spectrum (400 MHz) of **1** in  $\text{CDCl}_3$ .

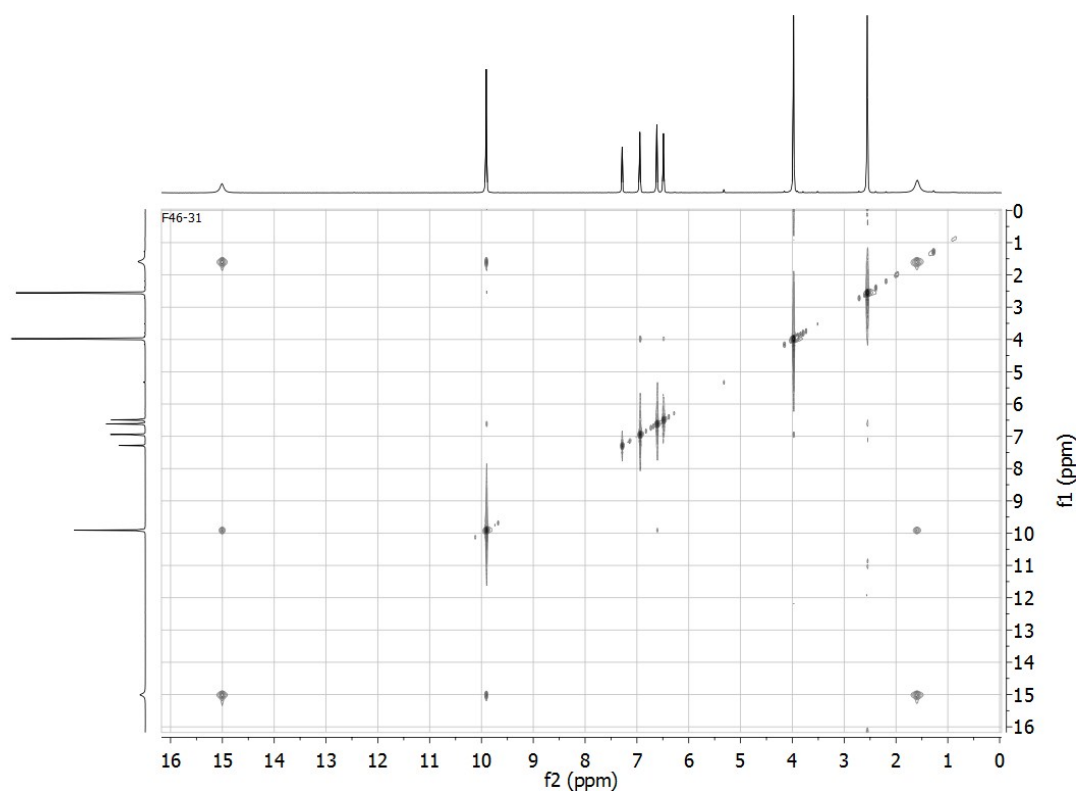

**Figure S6.** NOESY spectrum (400 MHz) of **1** in  $\text{CDCl}_3$ .

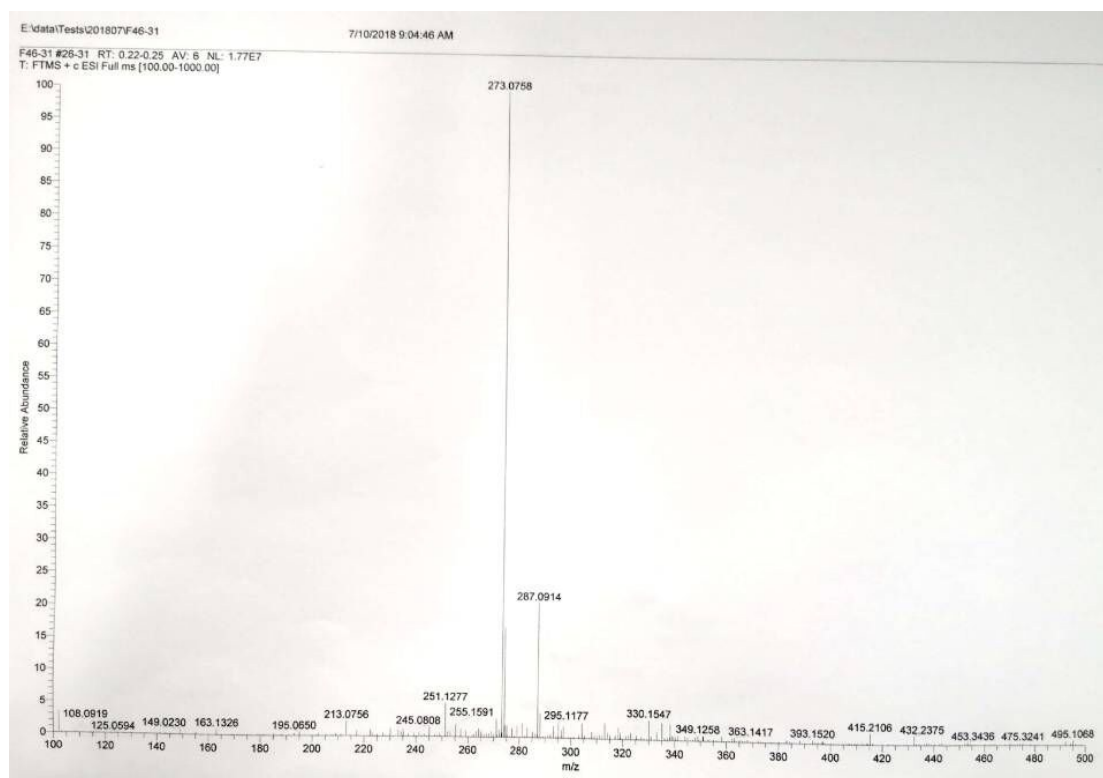

**Figure S7.** ESIHRMS spectrum of **1**.

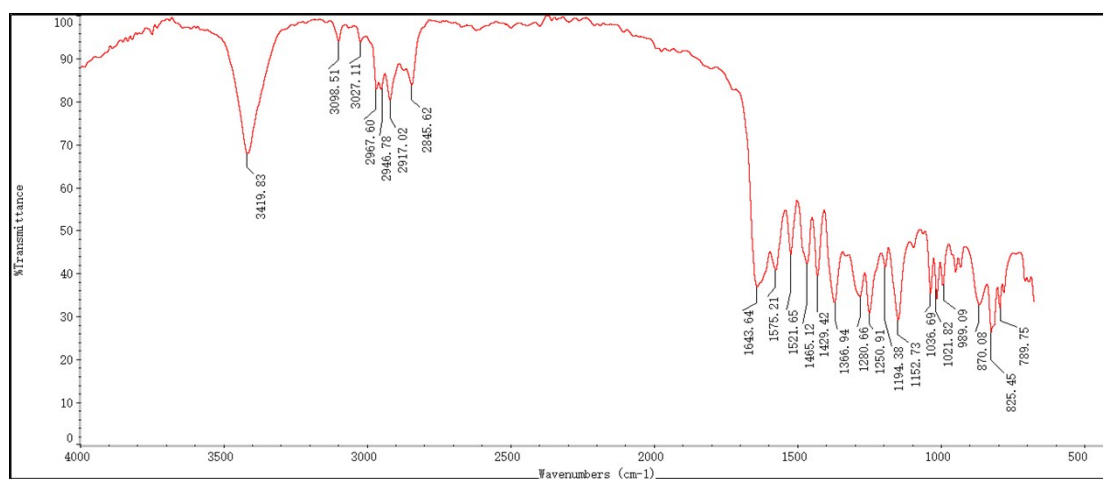

**Figure S8.** IR spectrum of **1**.

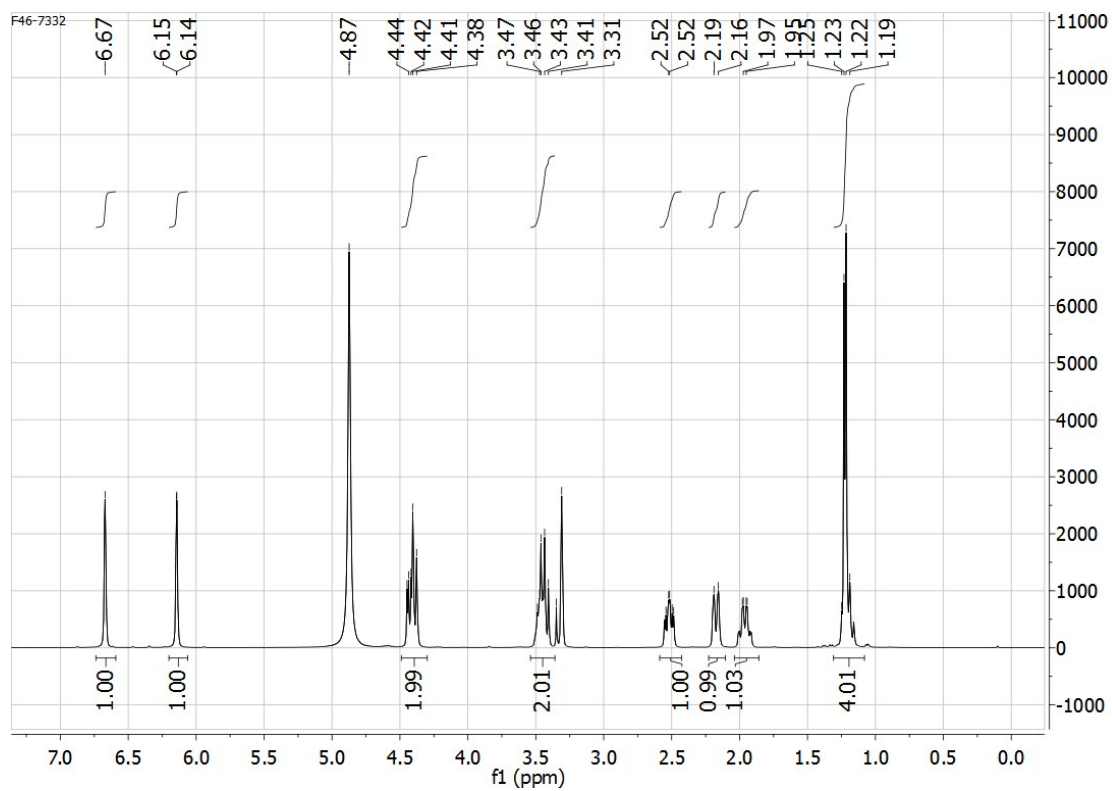

**Figure S9.**  $^1\text{H}$  NMR spectrum (400 MHz) of **2** in  $\text{CD}_3\text{OD}$ .

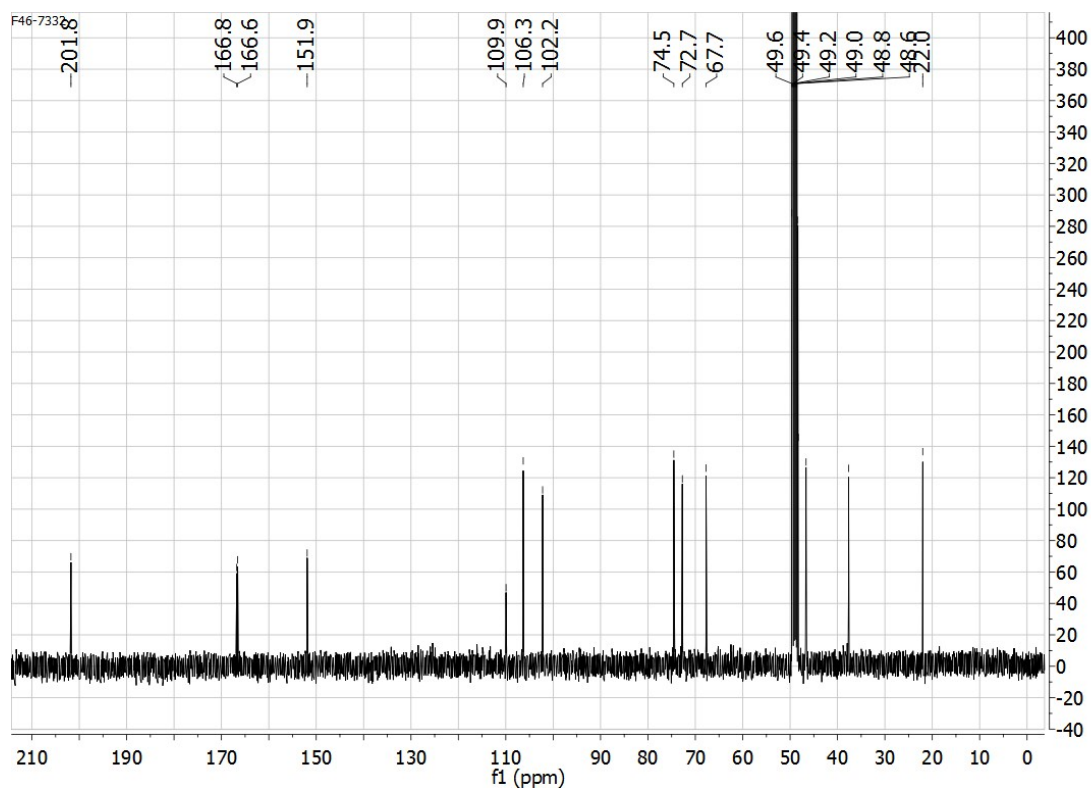

**Figure S10.** <sup>13</sup>C NMR spectrum (100 MHz) of **2** in CD<sub>3</sub>OD.

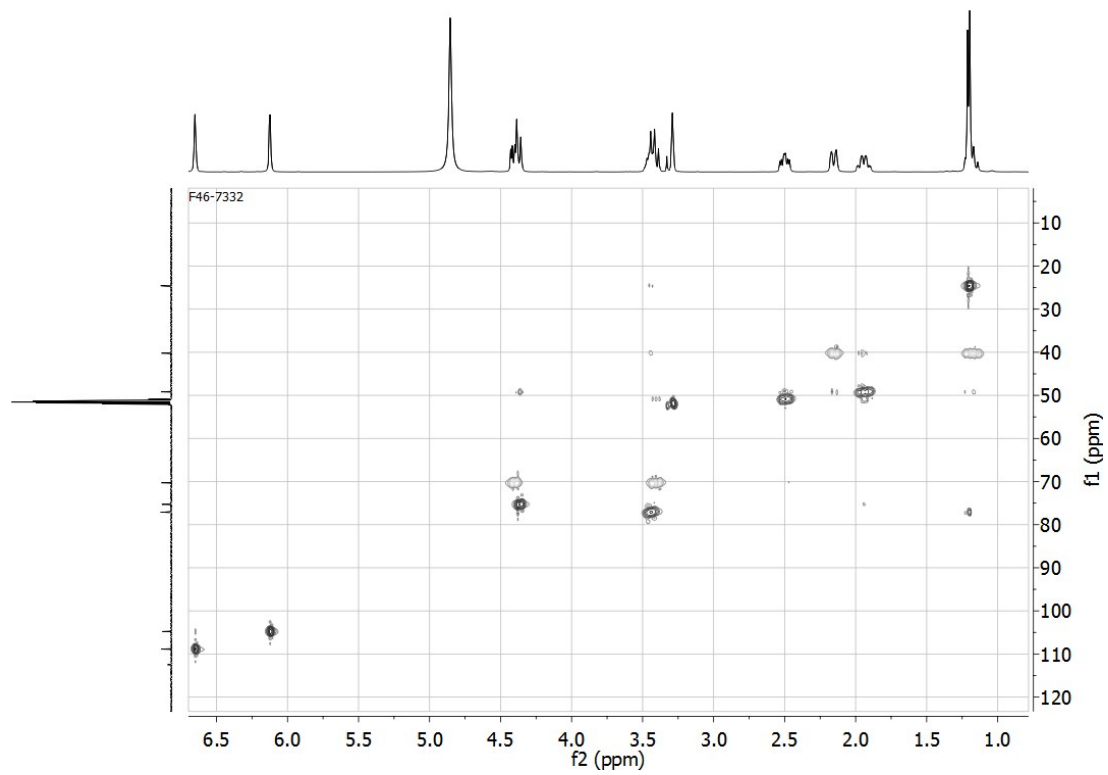

**Figure S11.** HSQC spectrum (400 MHz) of **2** in CD<sub>3</sub>OD.



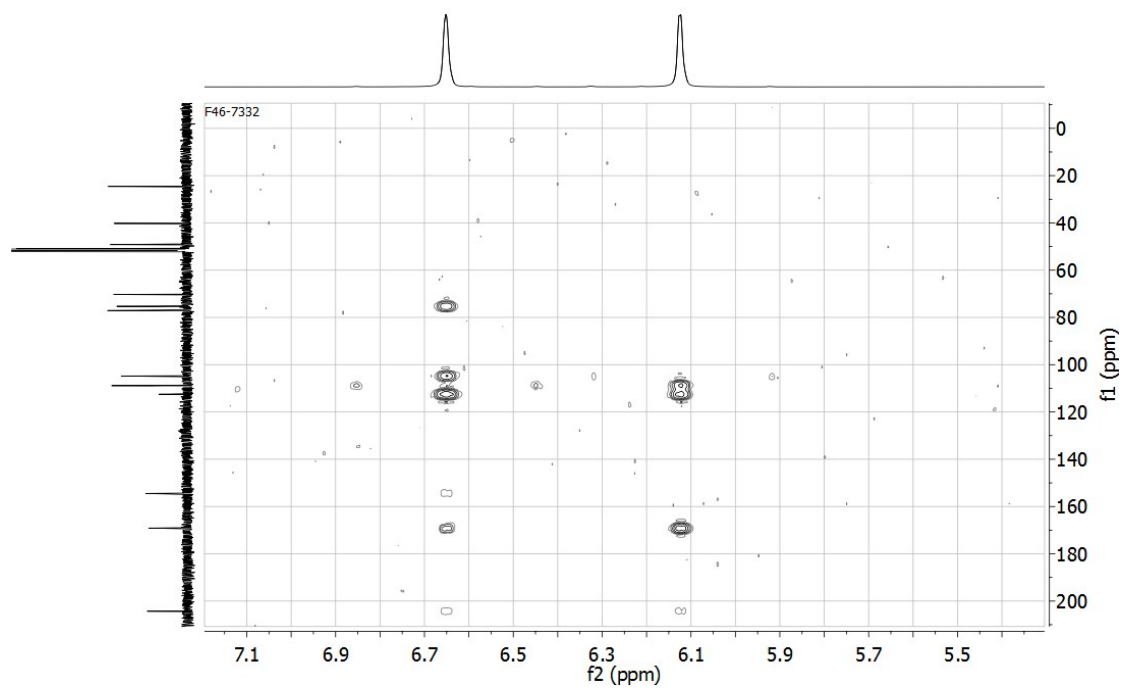

**Figure S12.** HMBC spectrum (400 MHz) of **2** in CD<sub>3</sub>OD.

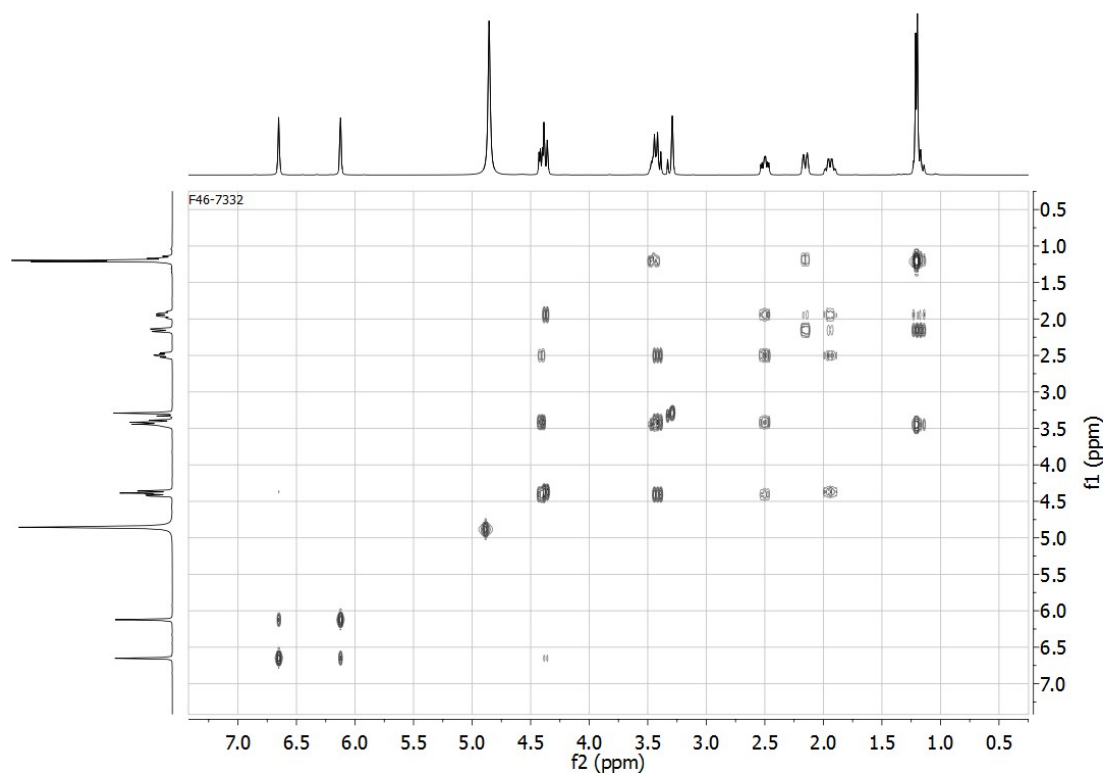

**Figure S13.**  $^1\text{H}$ - $^1\text{H}$  COSY spectrum (400 MHz) of **2** in  $\text{CD}_3\text{OD}$ .

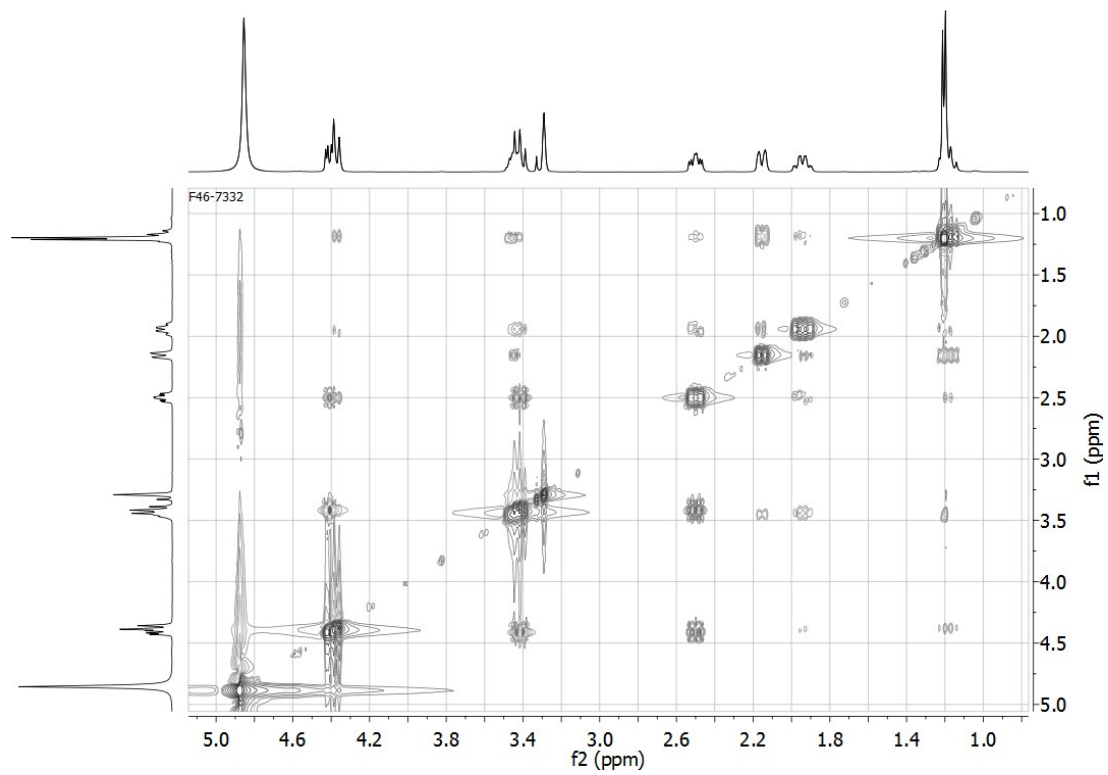

**Figure S14.** NOESY spectrum (400 MHz) of **2** in CD<sub>3</sub>OD.

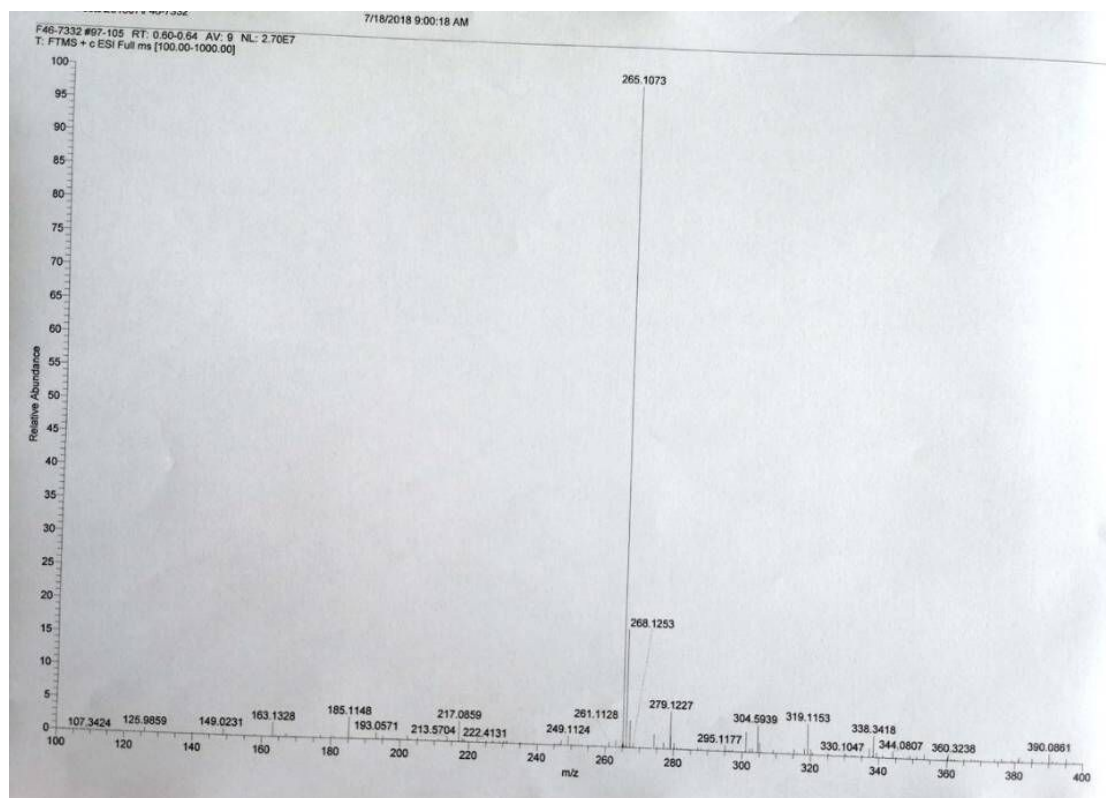

**Figure S15.** ESIHRMS spectrum of **2**.

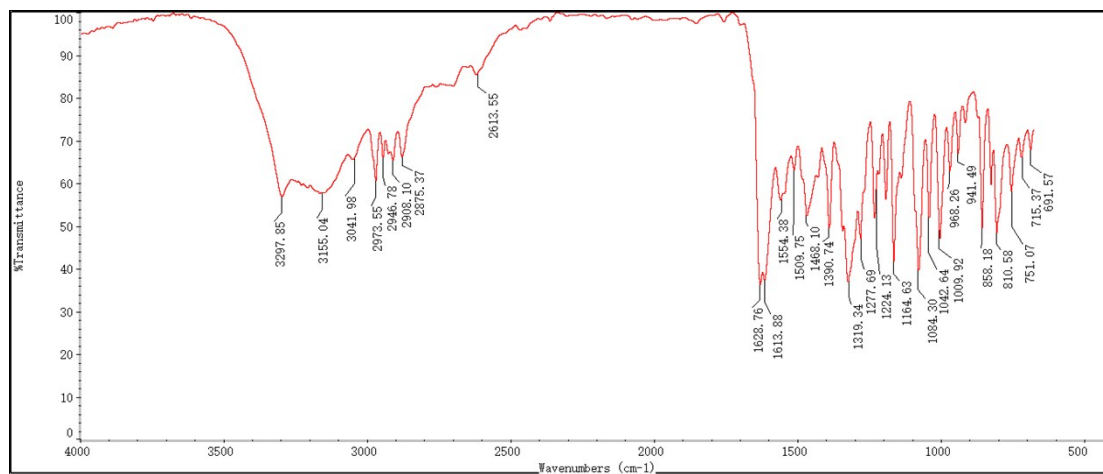

**Figure S16.** IR spectrum of **2**.

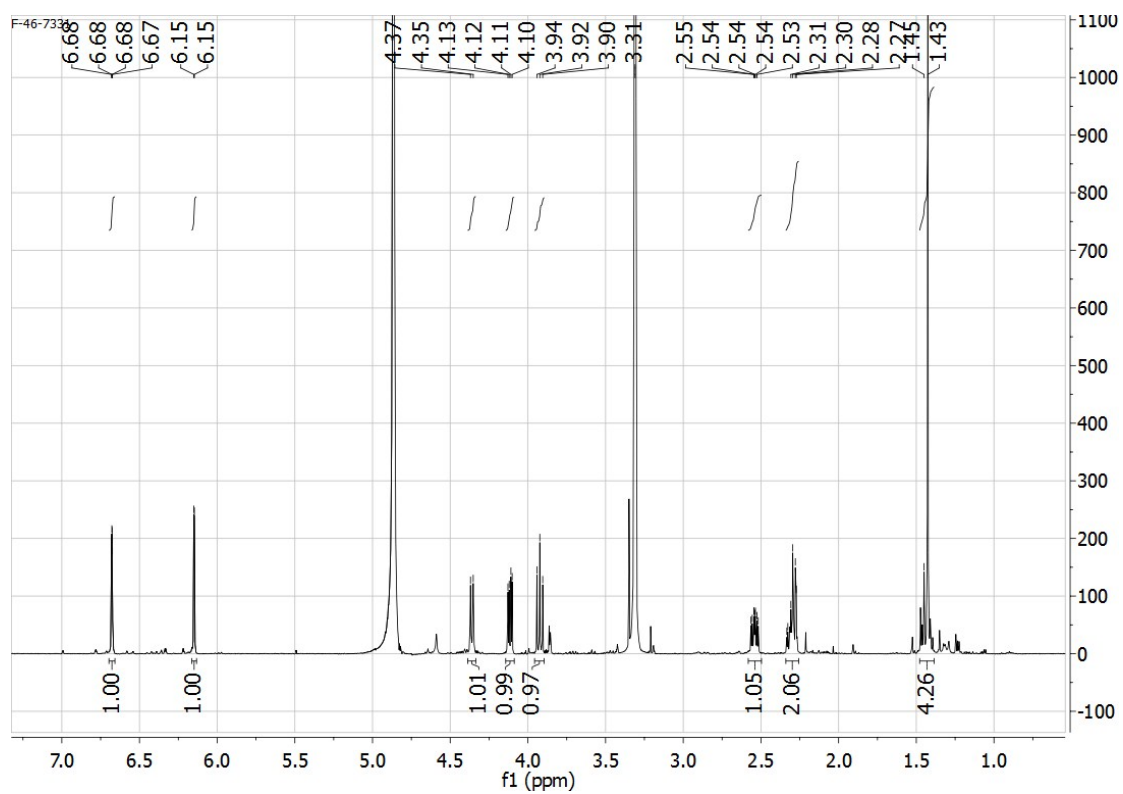

**Figure S17.**  $^1\text{H}$  NMR spectrum (600 MHz) of **3** in  $\text{CD}_3\text{OD}$ .

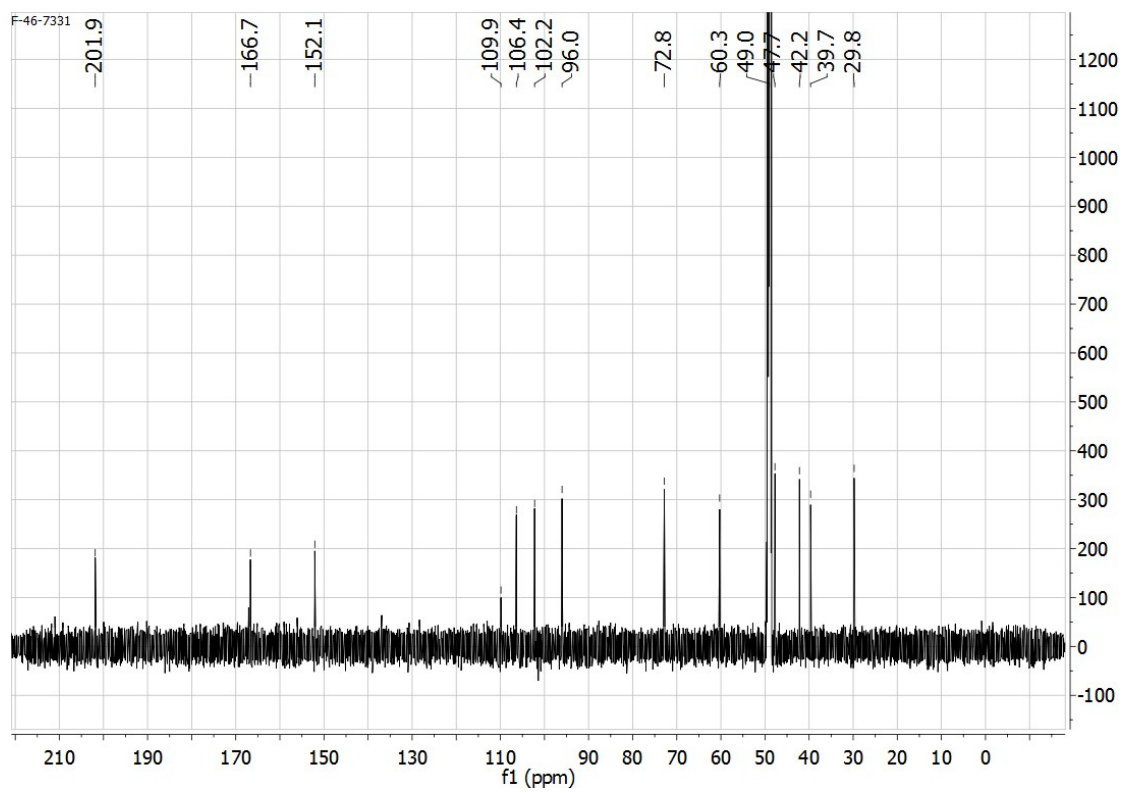

**Figure S18.**  $^{13}\text{C}$  NMR spectrum (150 MHz) of **3** in  $\text{CD}_3\text{OD}$ .

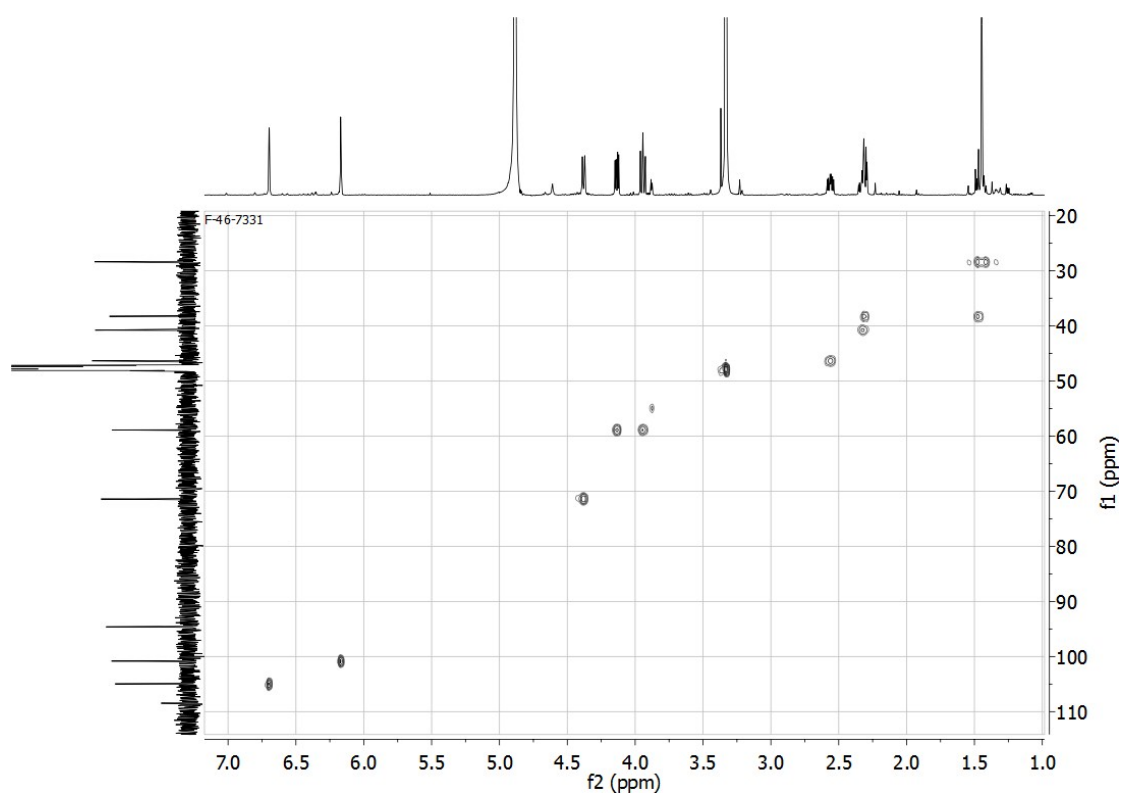

**Figure S19.** HSQC spectrum (600 MHz) of **3** in  $\text{CD}_3\text{OD}$ .



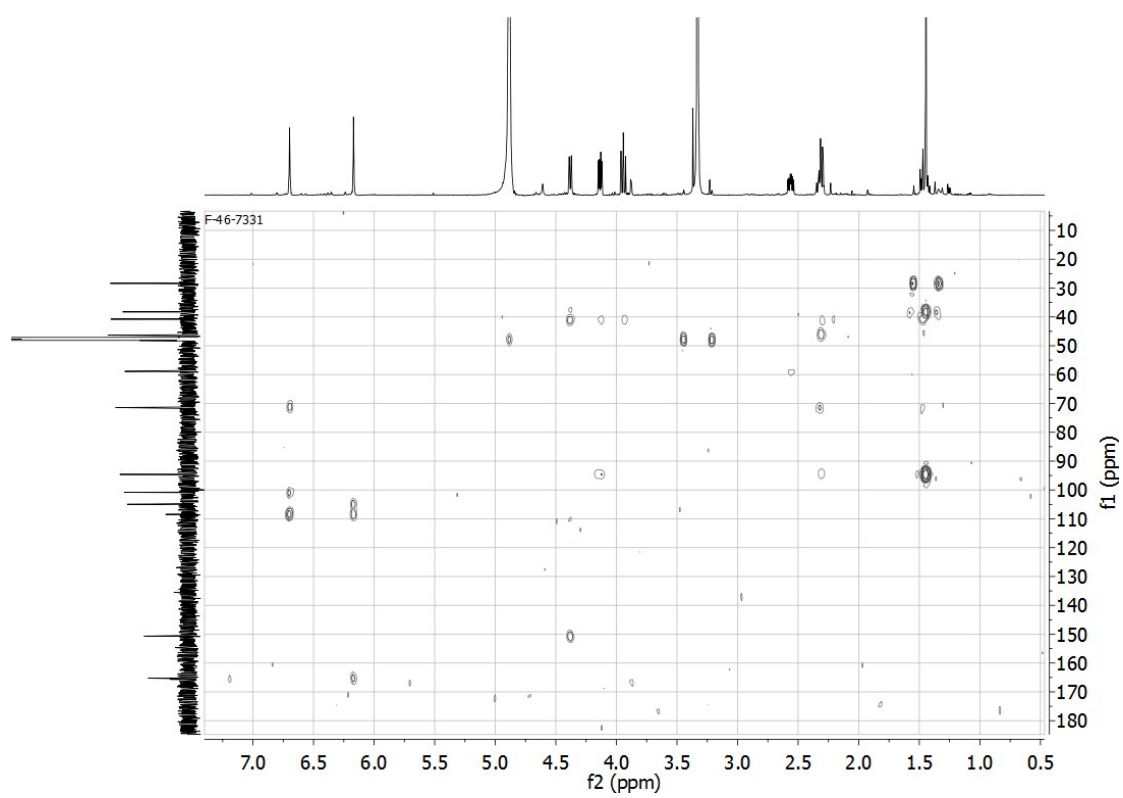

**Figure S20.** HMBC spectrum (600 MHz) of **3** in CD<sub>3</sub>OD.

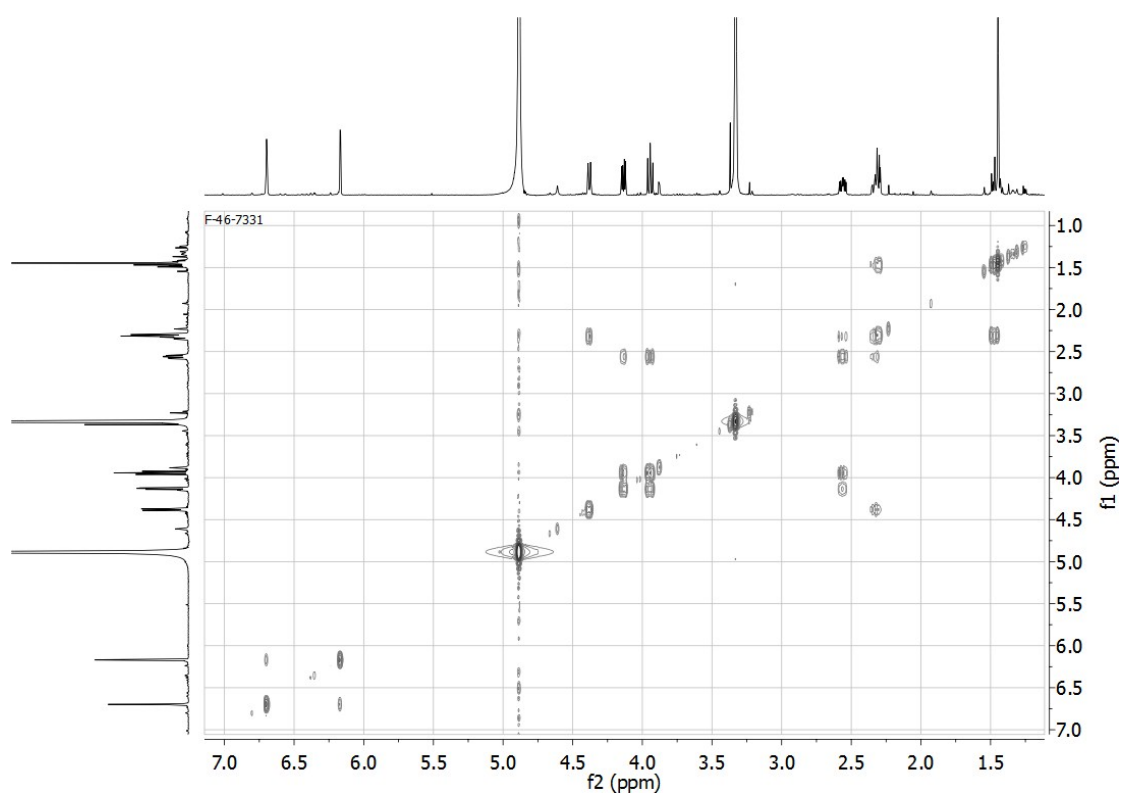

**Figure S21.**  $^1\text{H}$ - $^1\text{H}$  COSY spectrum (600 MHz) of **3** in  $\text{CD}_3\text{OD}$ .

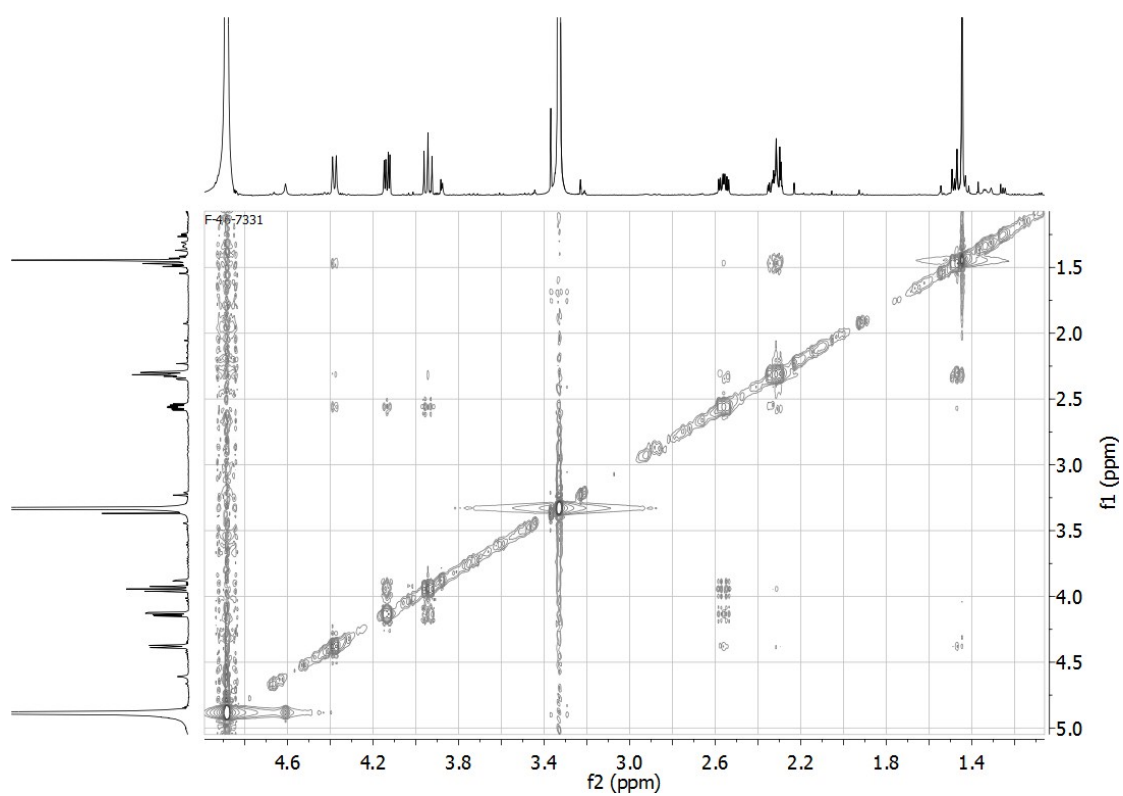

**Figure S22.** NOESY spectrum (600 MHz) of **3** in CD<sub>3</sub>OD.

F46-rice #603 RT: 8.68 AV: 1 NL: 7.28E6  
T: FTMS - p ESI Full lock ms [200.0000-2000.0000]

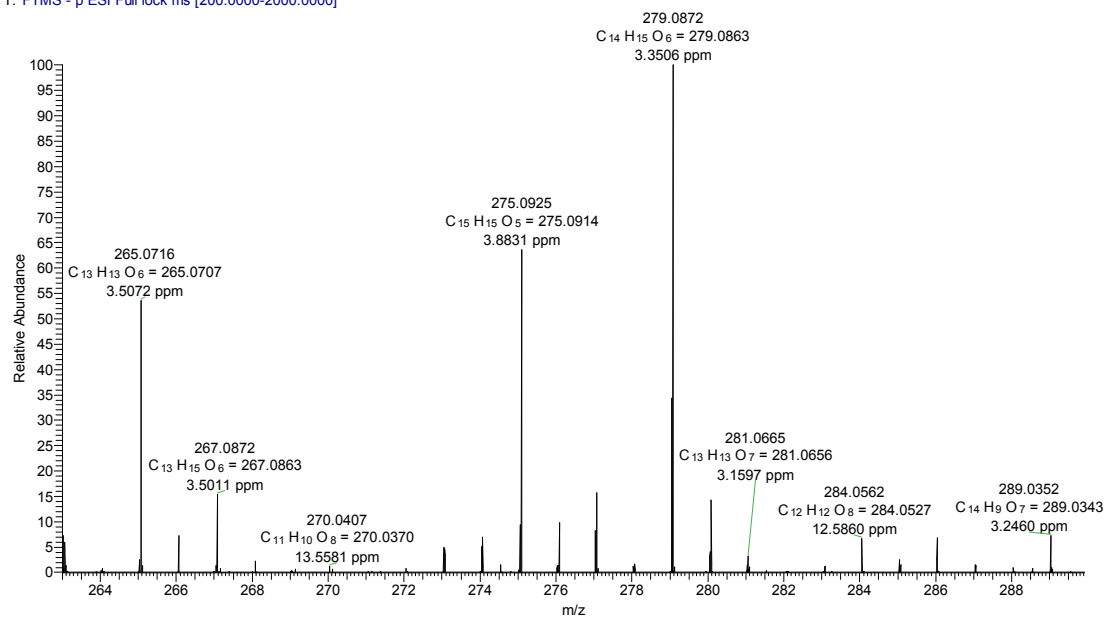

Figure S23. ESIHRMS spectrum of 3.

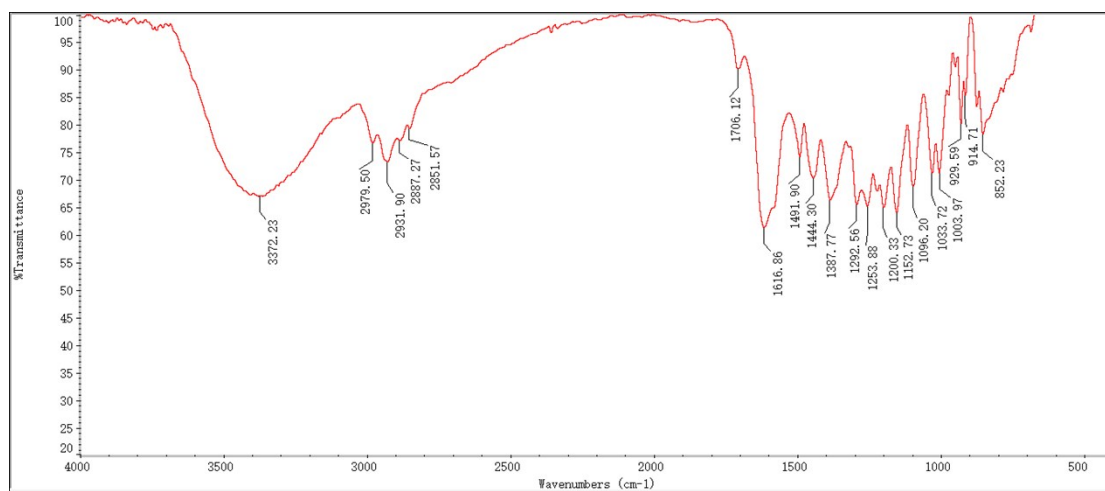

**Figure S24.** IR spectrum of **3**.

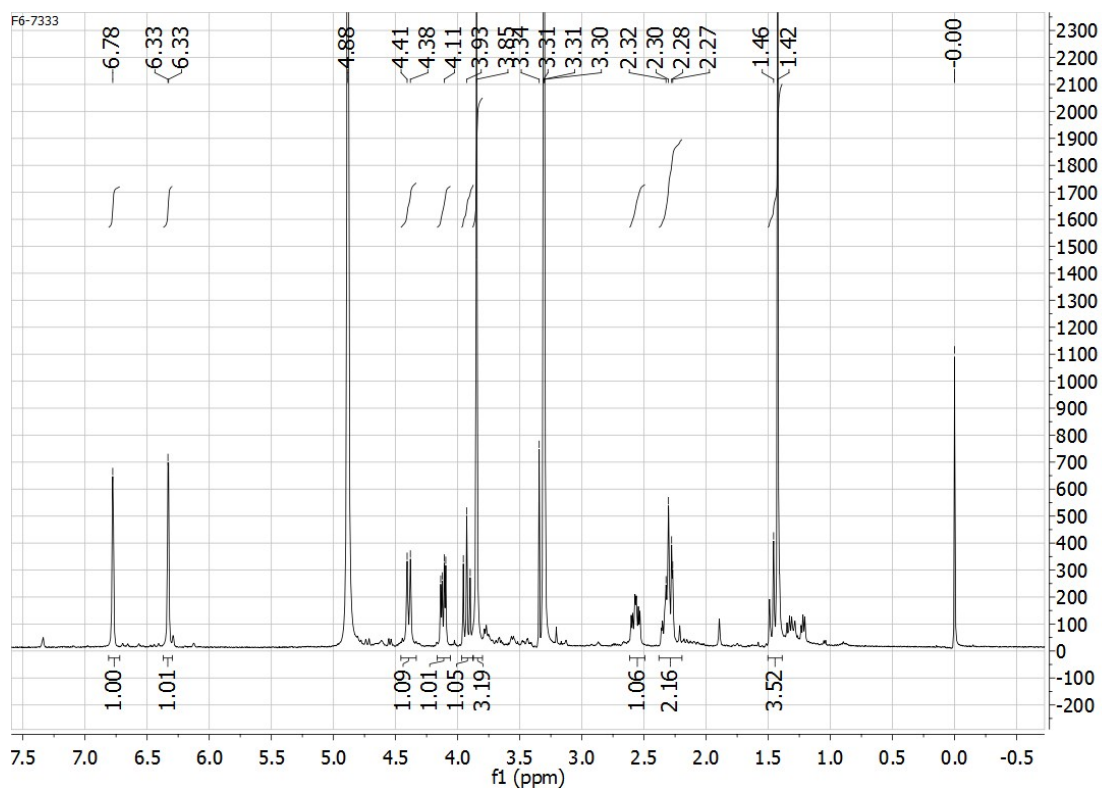

**Figure S25.**  $^1\text{H}$  NMR spectrum (400 MHz) of **4** in  $\text{CD}_3\text{OD}$ .

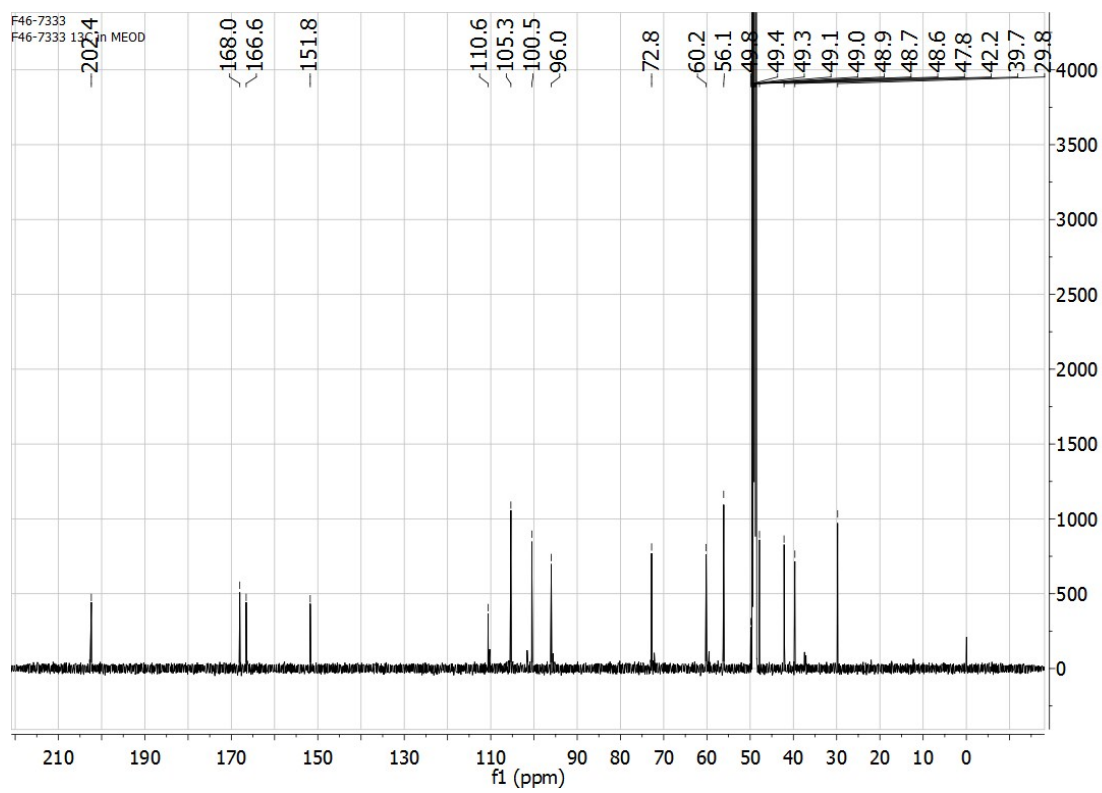

**Figure S26.**  $^{13}\text{C}$  NMR spectrum (150 MHz) of **4** in  $\text{CD}_3\text{OD}$ .

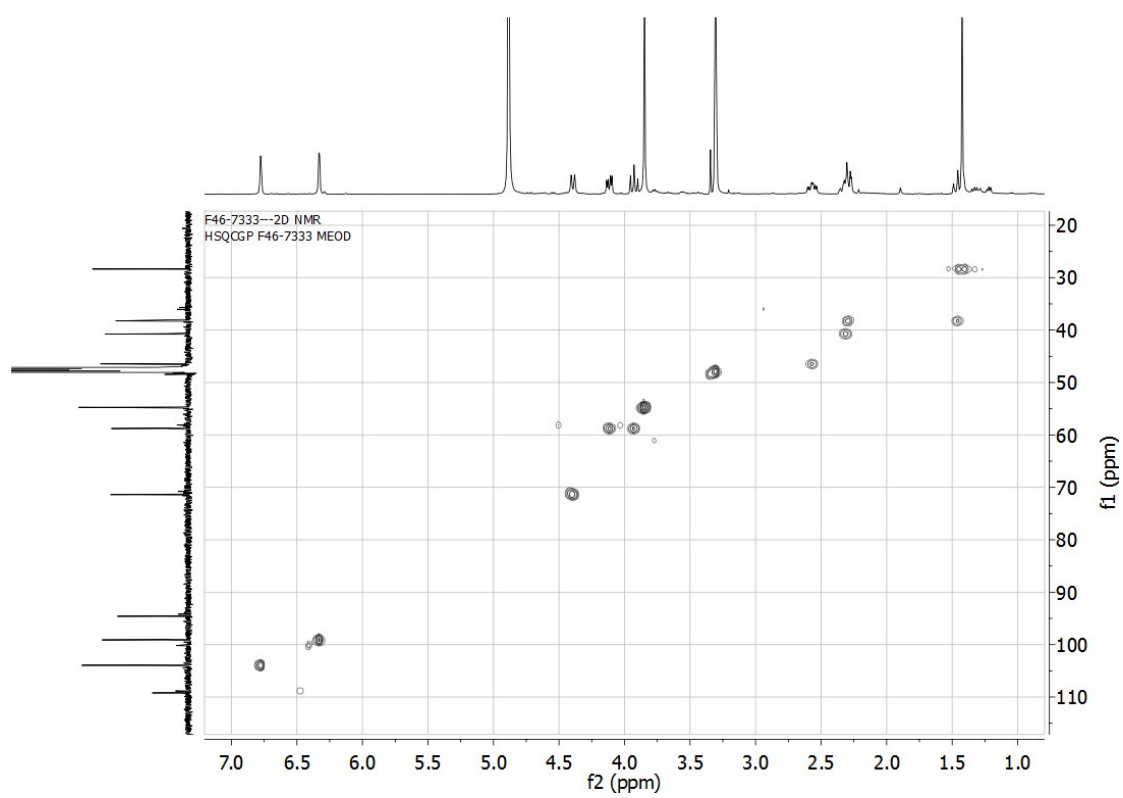

**Figure S27.** HSQC spectrum (600 MHz) of **4** in CD<sub>3</sub>OD.



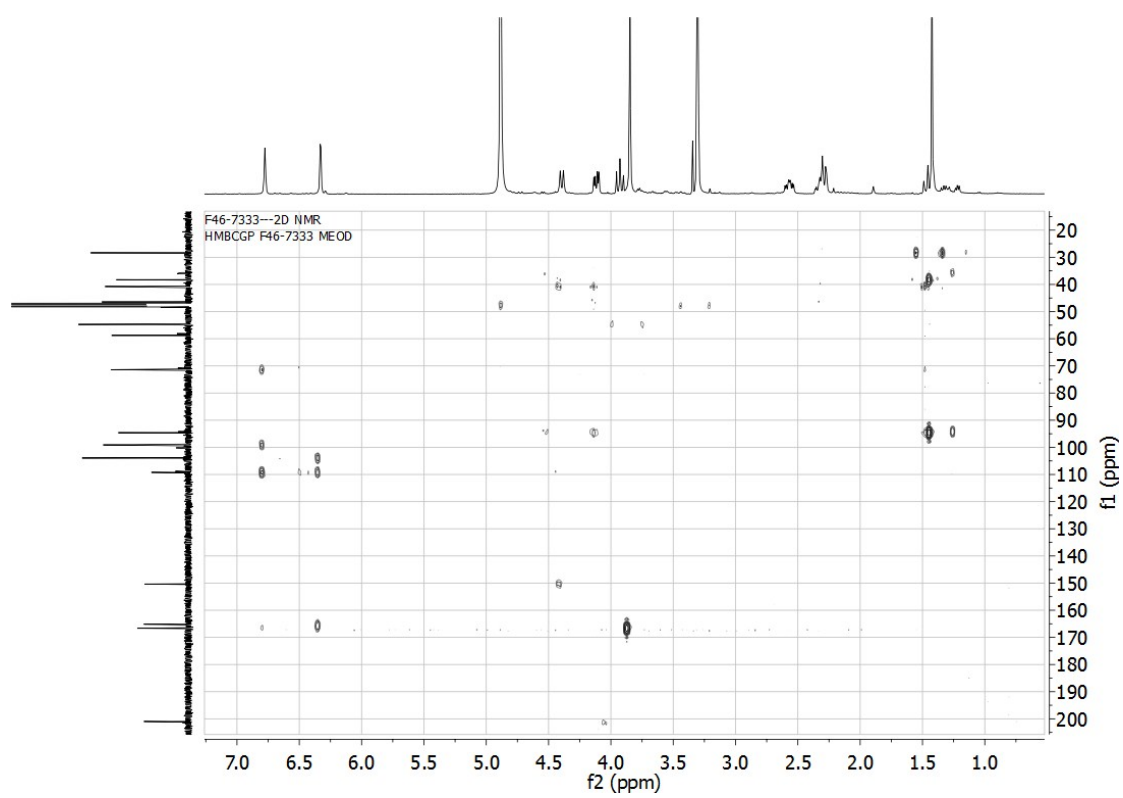

**Figure S28.** HMBC spectrum (600 MHz) of **4** in CD<sub>3</sub>OD.

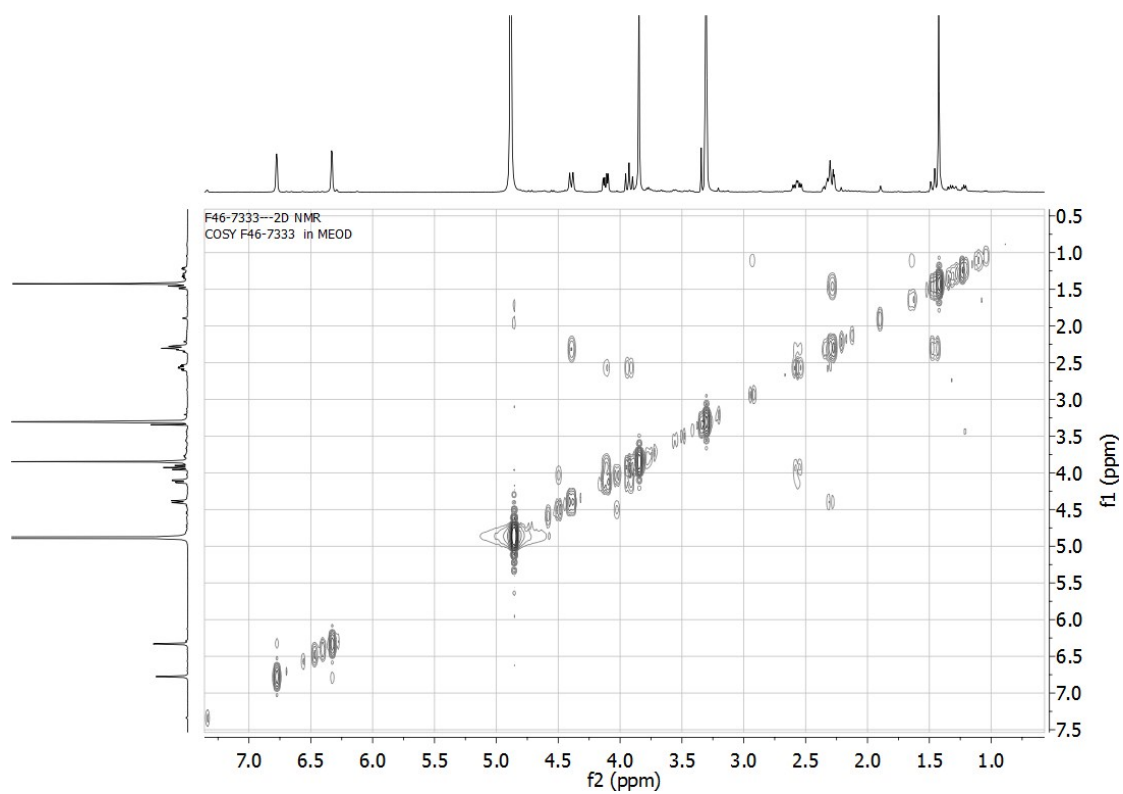

**Figure S29.**  $^1\text{H}$ - $^1\text{H}$  COSY spectrum (600 MHz) of **4** in  $\text{CD}_3\text{OD}$ .

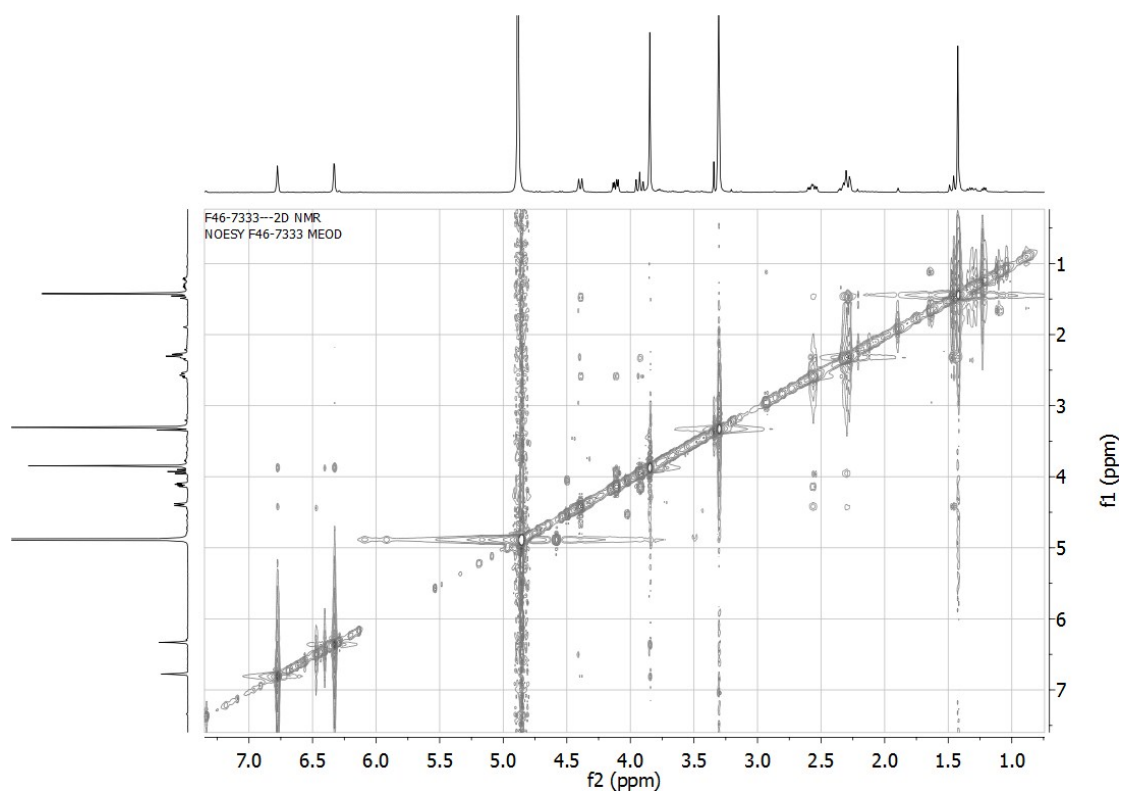

**Figure S30.** NOESY spectrum (600 MHz) of **4** in CD<sub>3</sub>OD.

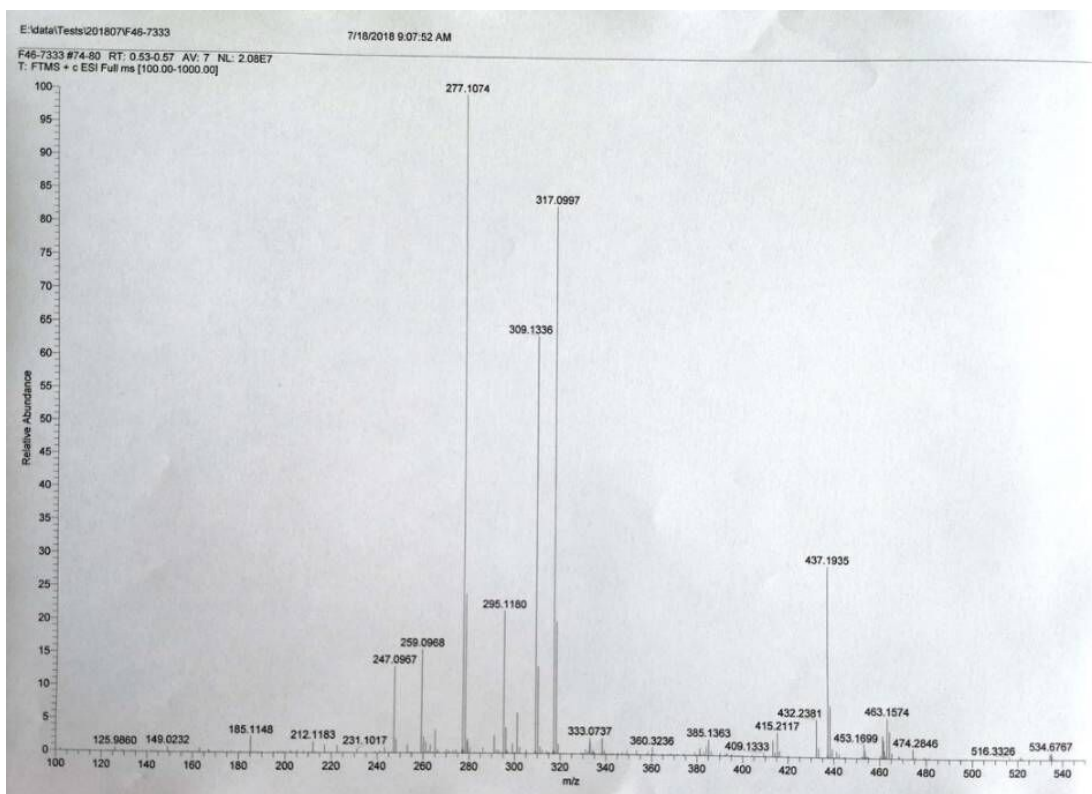

**Figure S31.** ESIHRMS spectrum of **4**.

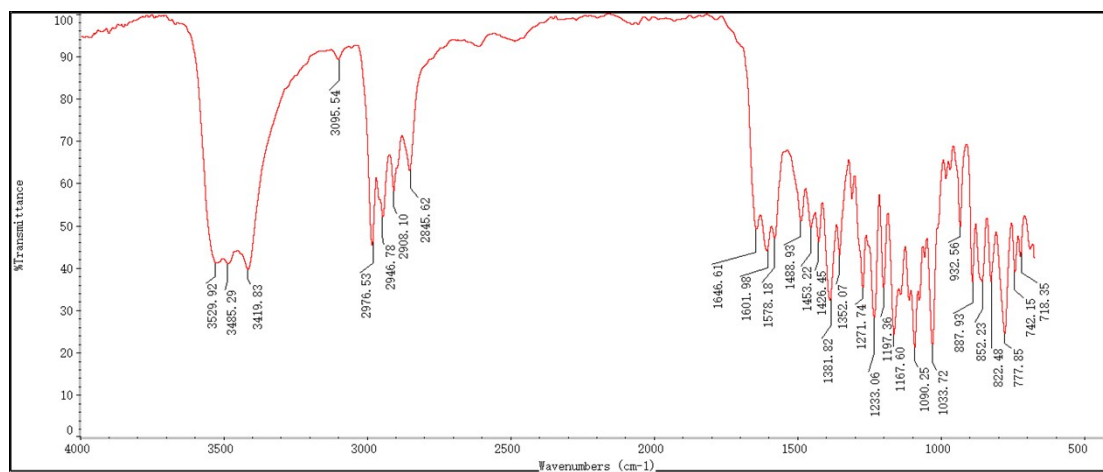

**Figure S32.** IR spectrum of **4**.

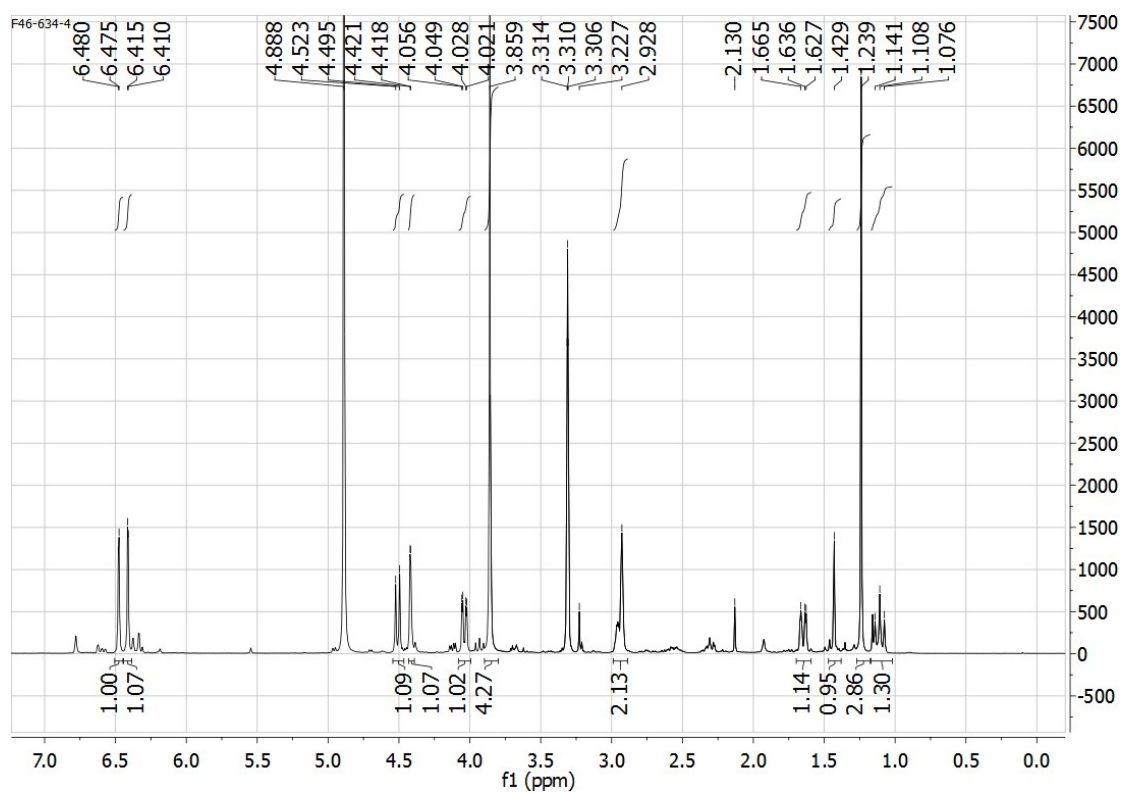

**Figure S33.**  $^1\text{H}$  NMR spectrum (400 MHz) of **5** in  $\text{CD}_3\text{OD}$ .

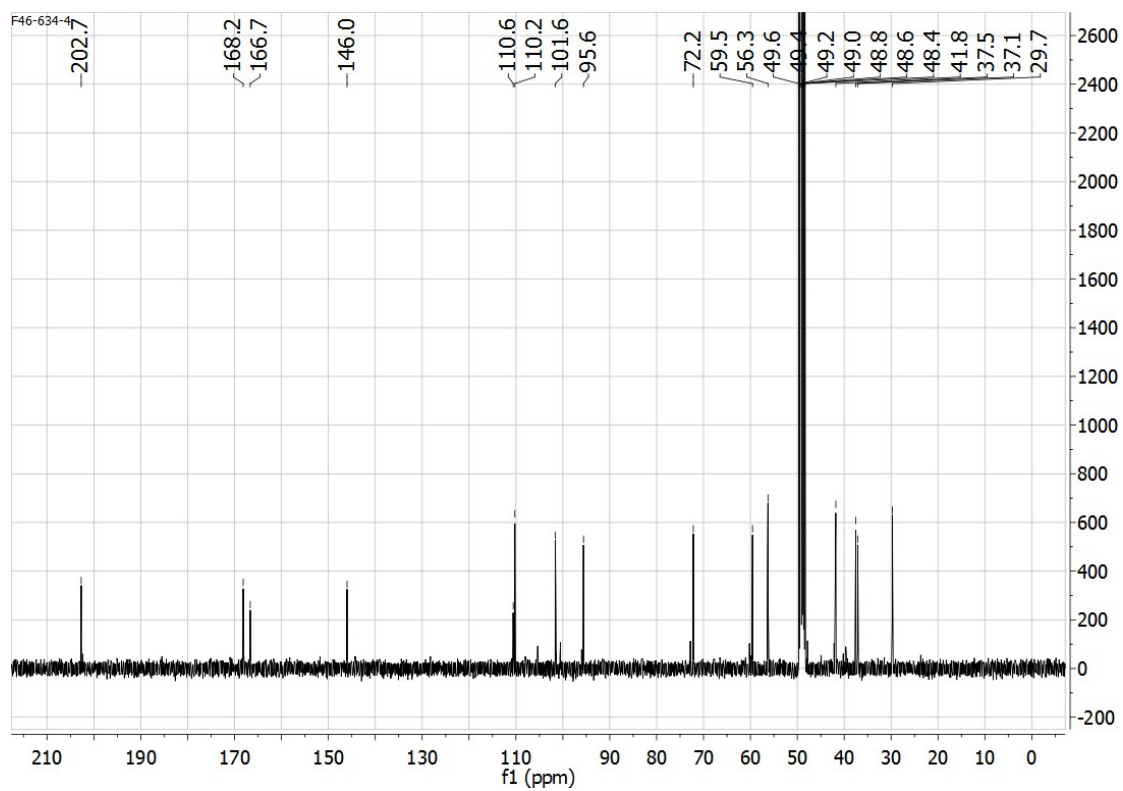

**Figure S34.** <sup>13</sup>C NMR spectrum (100 MHz) of **5** in CD<sub>3</sub>OD.

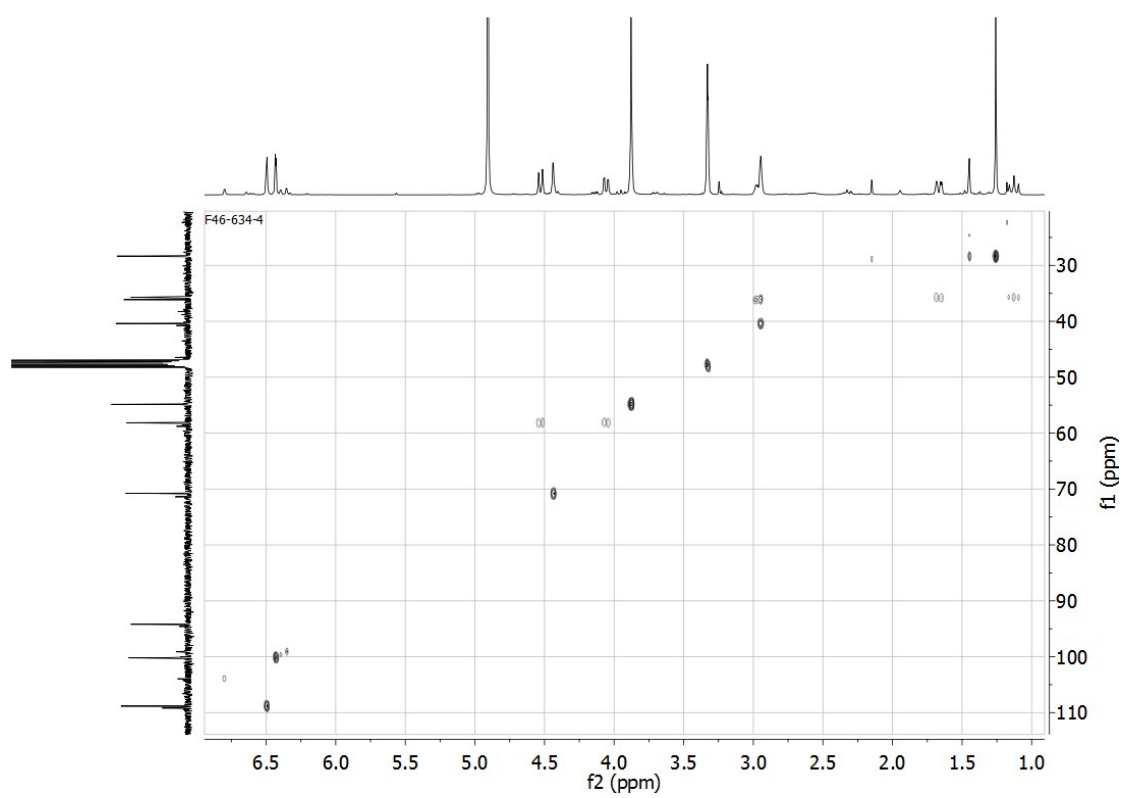

**Figure S35.** HSQC spectrum (400 MHz) of **5** in CD<sub>3</sub>OD.



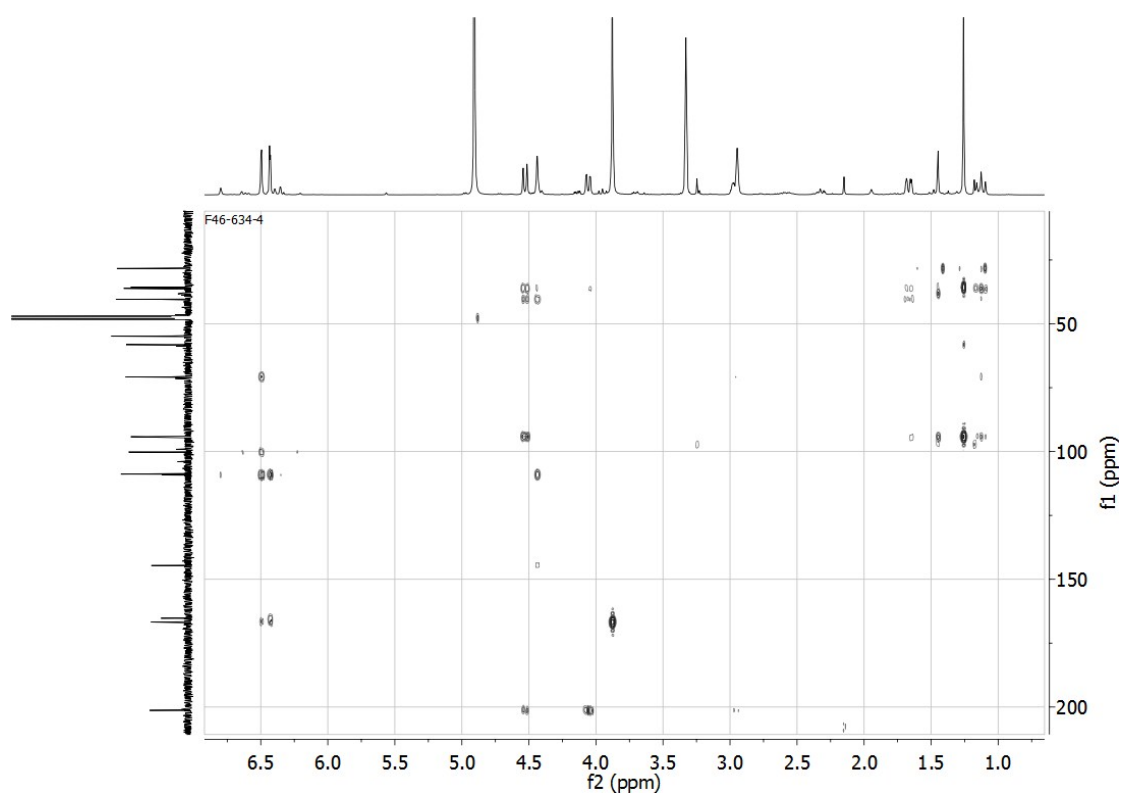

**Figure S36.** HMBC spectrum (400 MHz) of **5** in CD<sub>3</sub>OD.

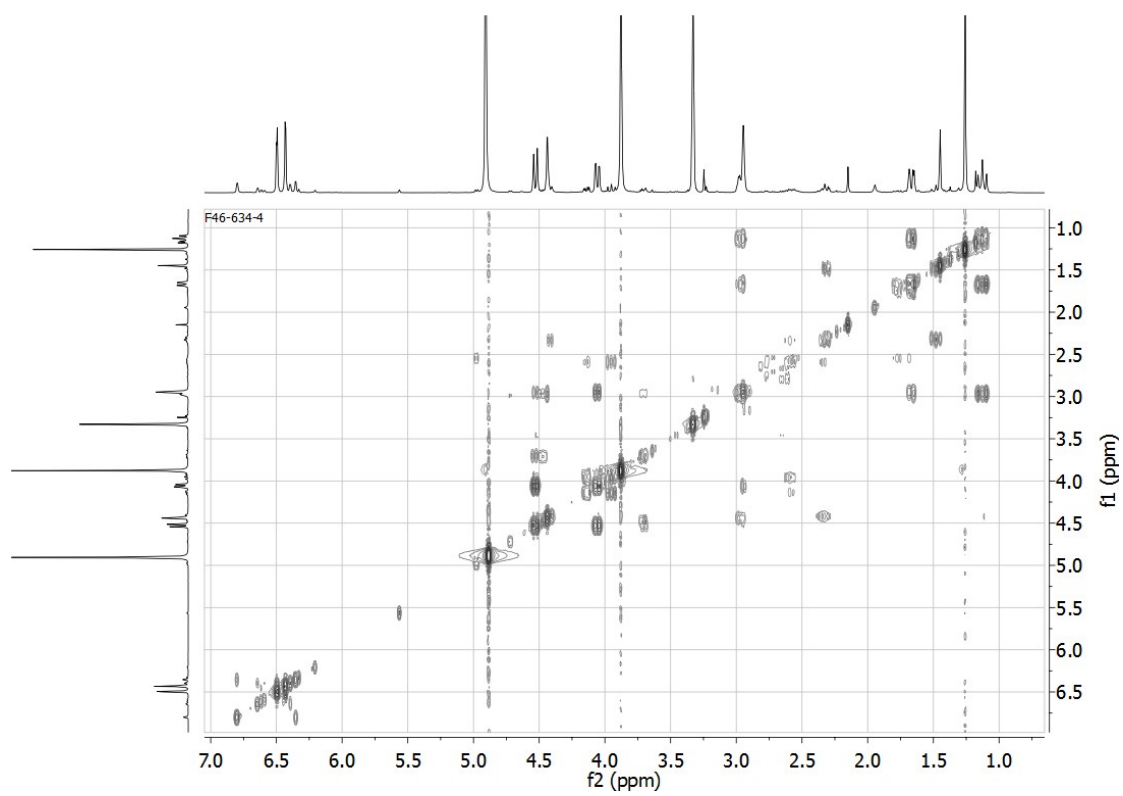

**Figure S37.**  $^1\text{H}$ - $^1\text{H}$  COSY spectrum (400 MHz) of **5** in  $\text{CD}_3\text{OD}$ .

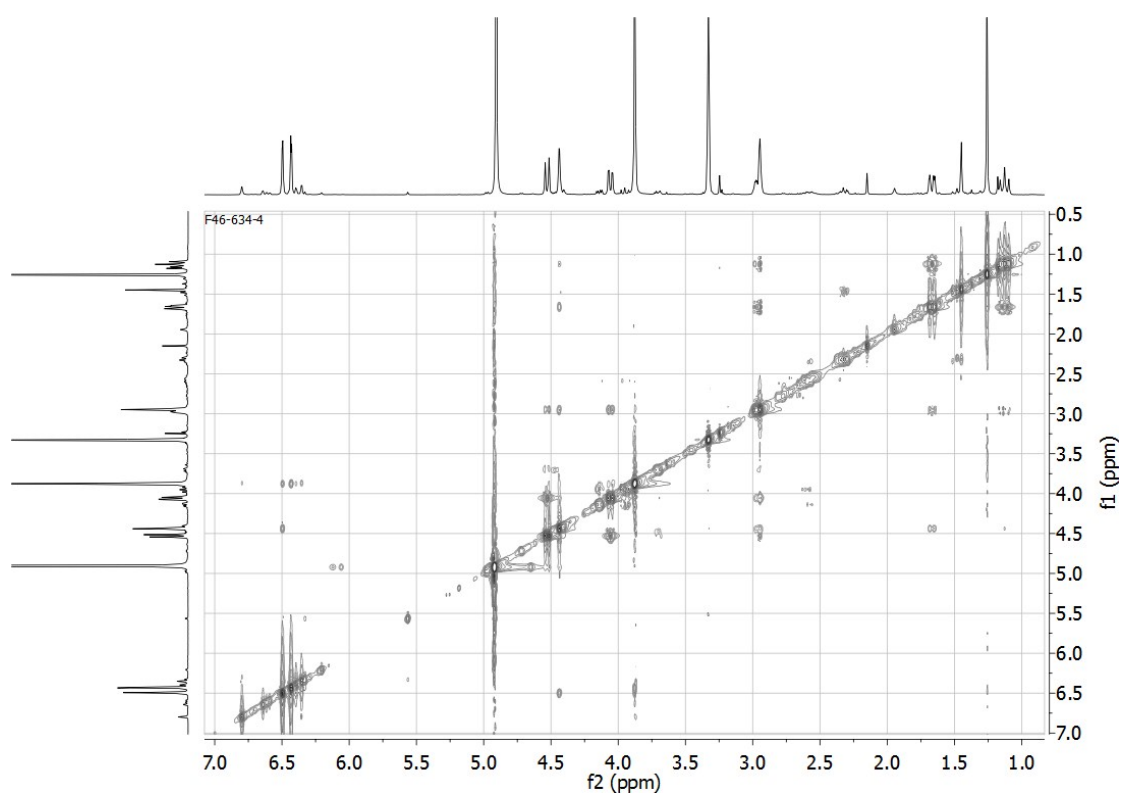

**Figure S38.** NOESY spectrum (400 MHz) of **5** in CD<sub>3</sub>OD.

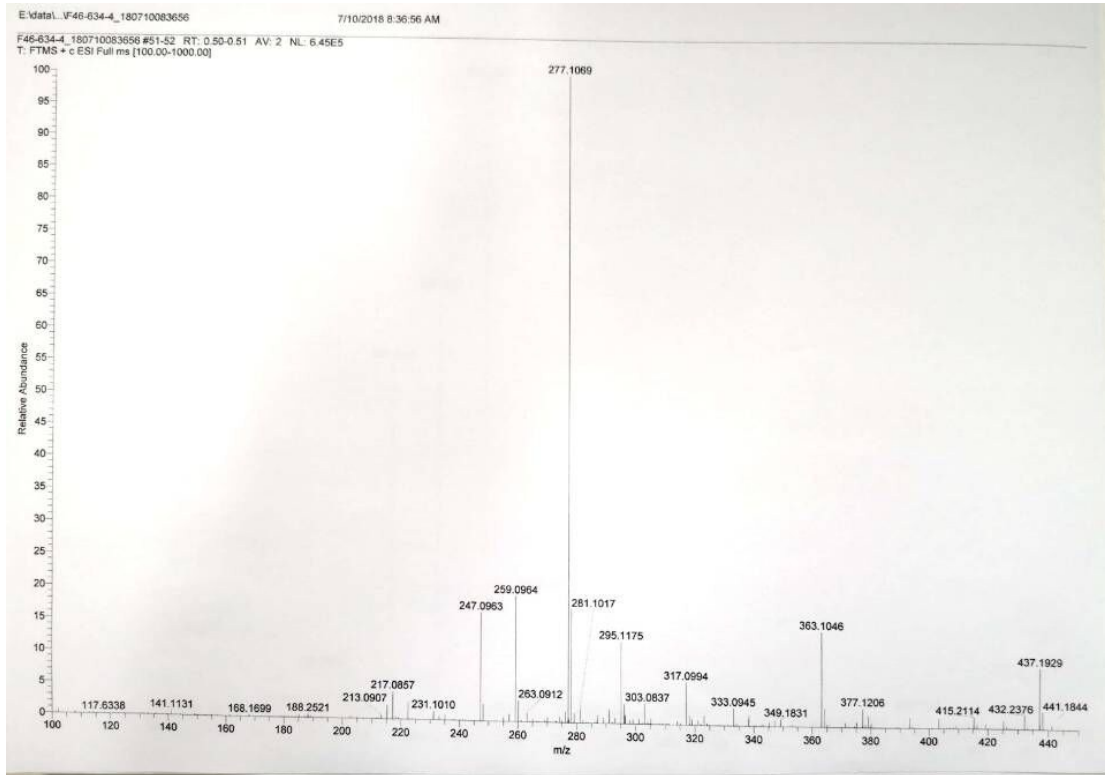

**Figure S39.** ESIHRMS spectrum of **5**.

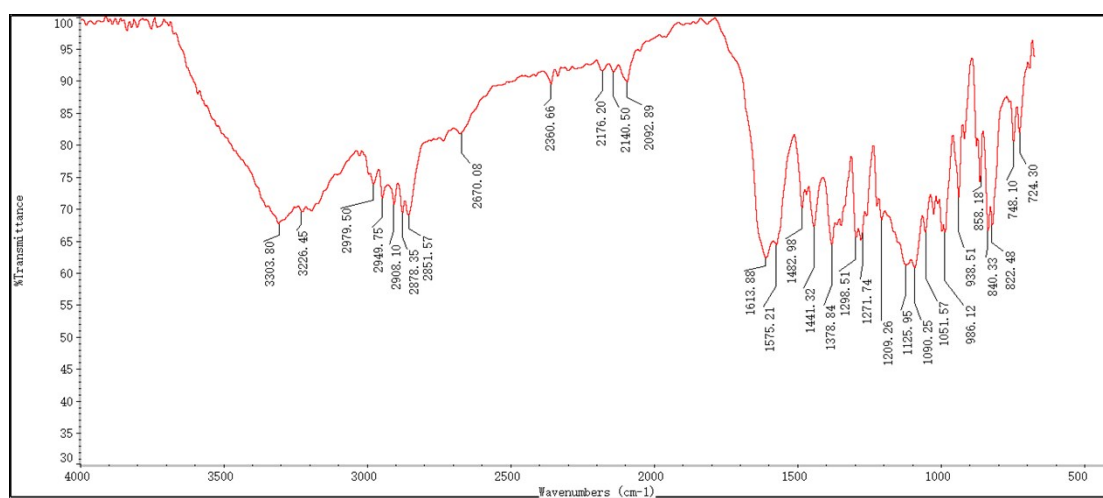

**Figure S40.** IR spectrum of **5**.

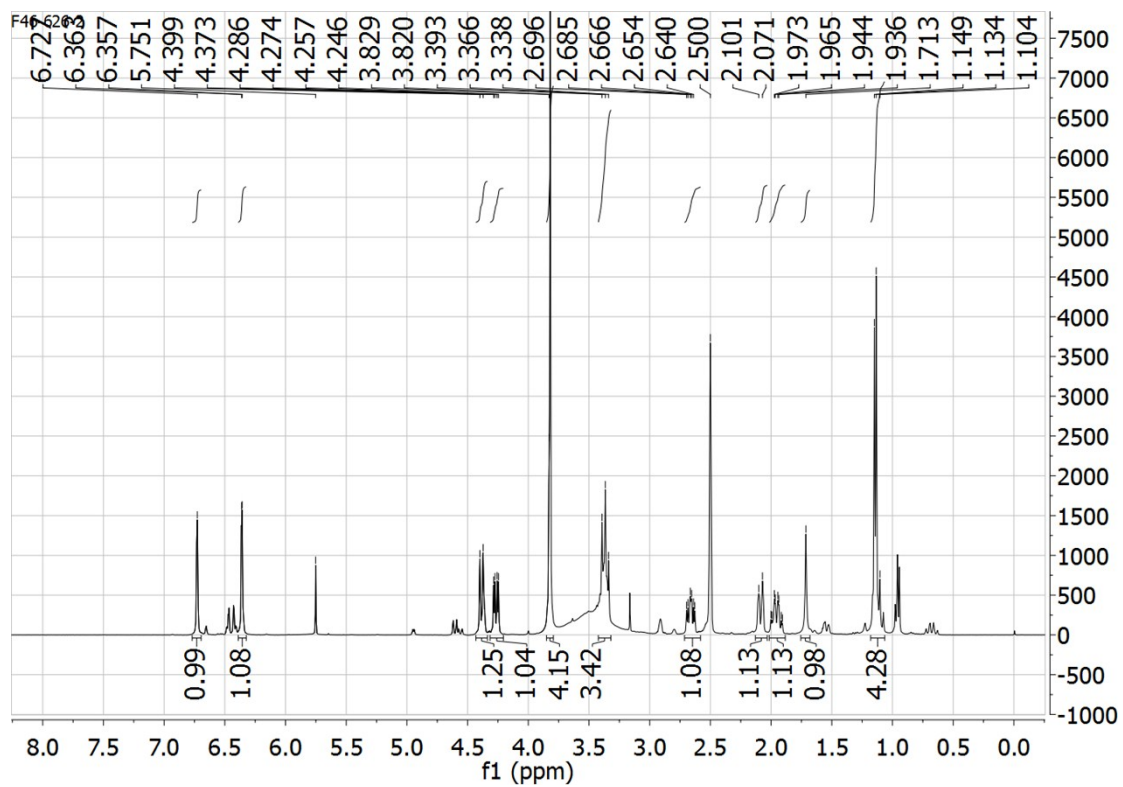

**Figure S41.** <sup>1</sup>H NMR spectrum (400 MHz) of **6** in DMSO-*d*<sub>6</sub>.

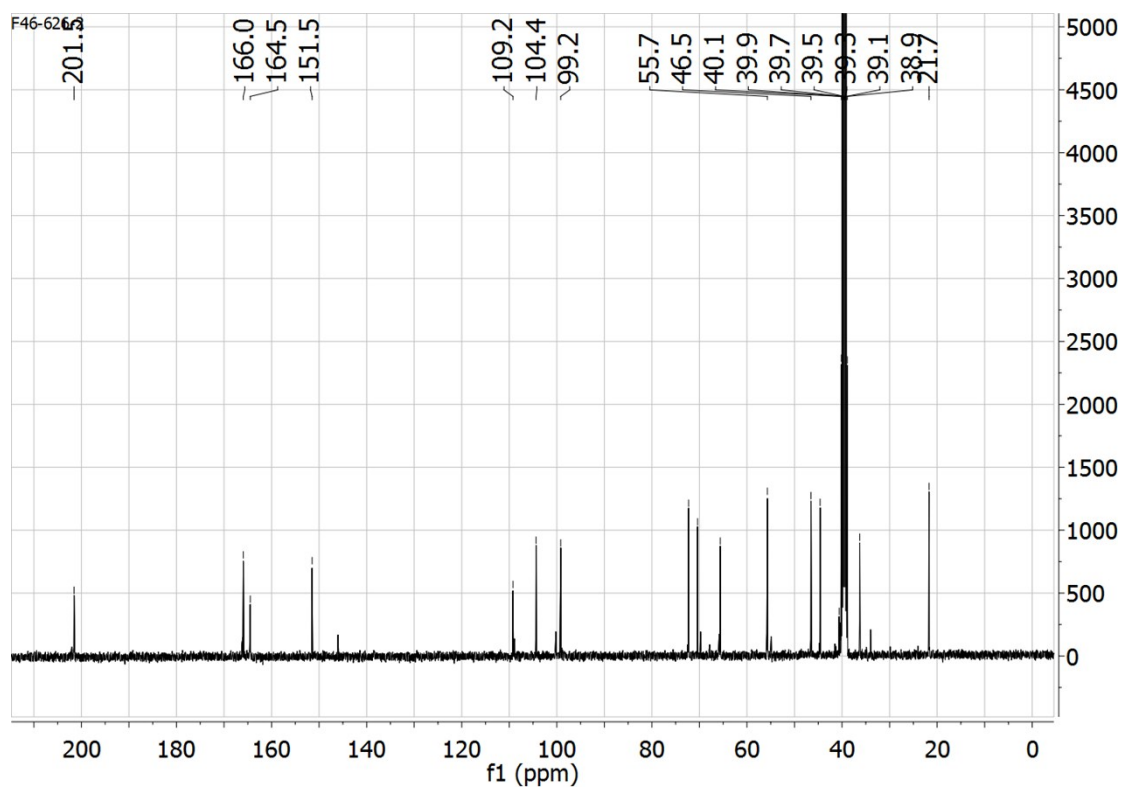

**Figure S42.**  $^{13}\text{C}$  NMR spectrum (100 MHz) of **6** in  $\text{DMSO-}d_6$ .

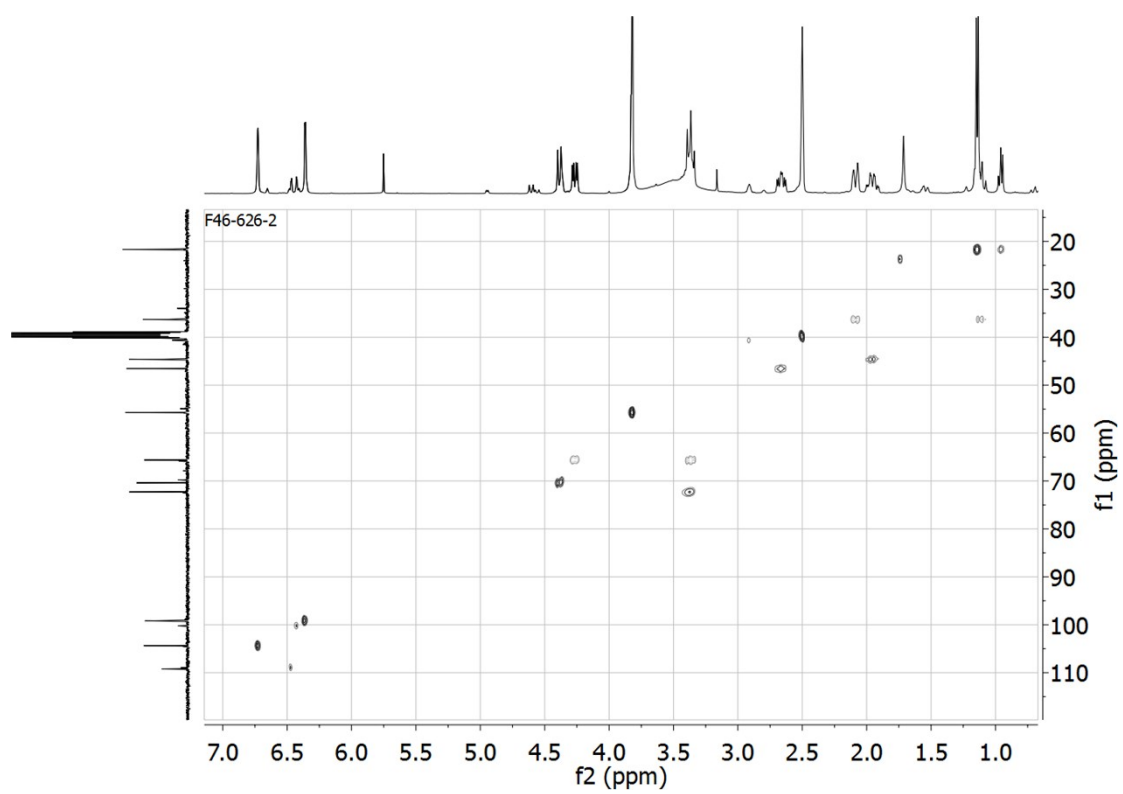

**Figure S43.** HSQC spectrum (400 MHz) of **6** in DMSO- $d_6$ .



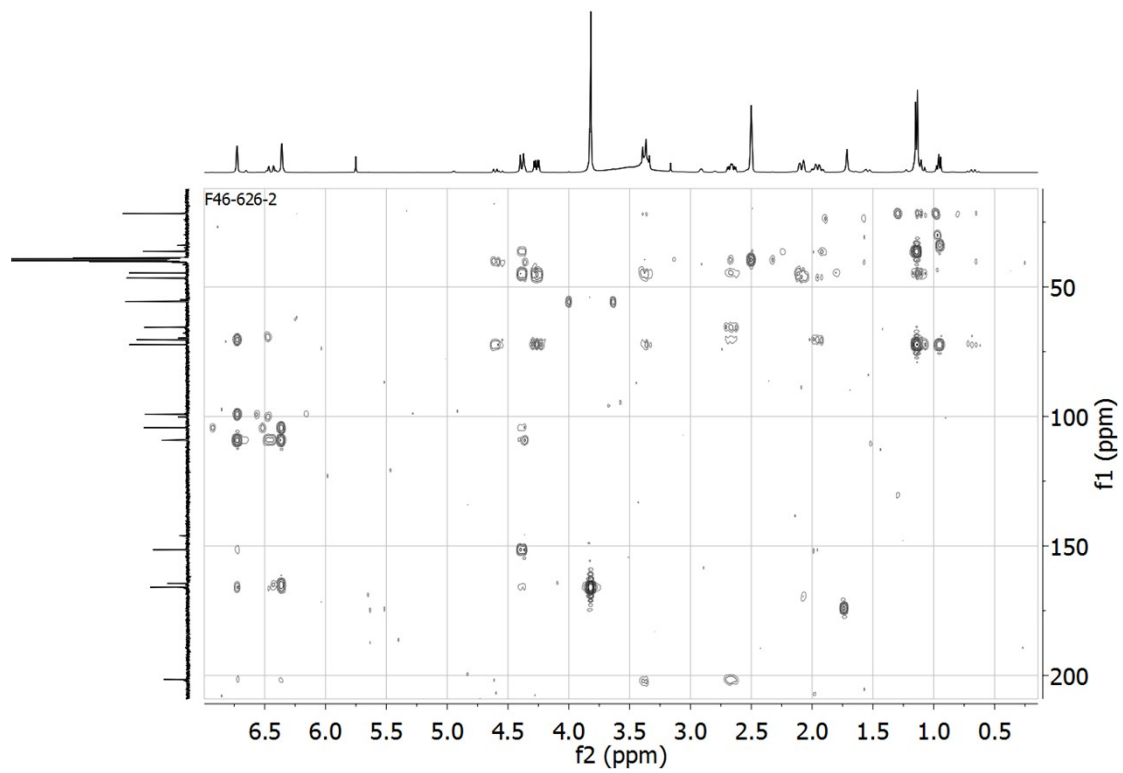

**Figure S44.** HMBC spectrum (400 MHz) of **6** in DMSO- $d_6$ .

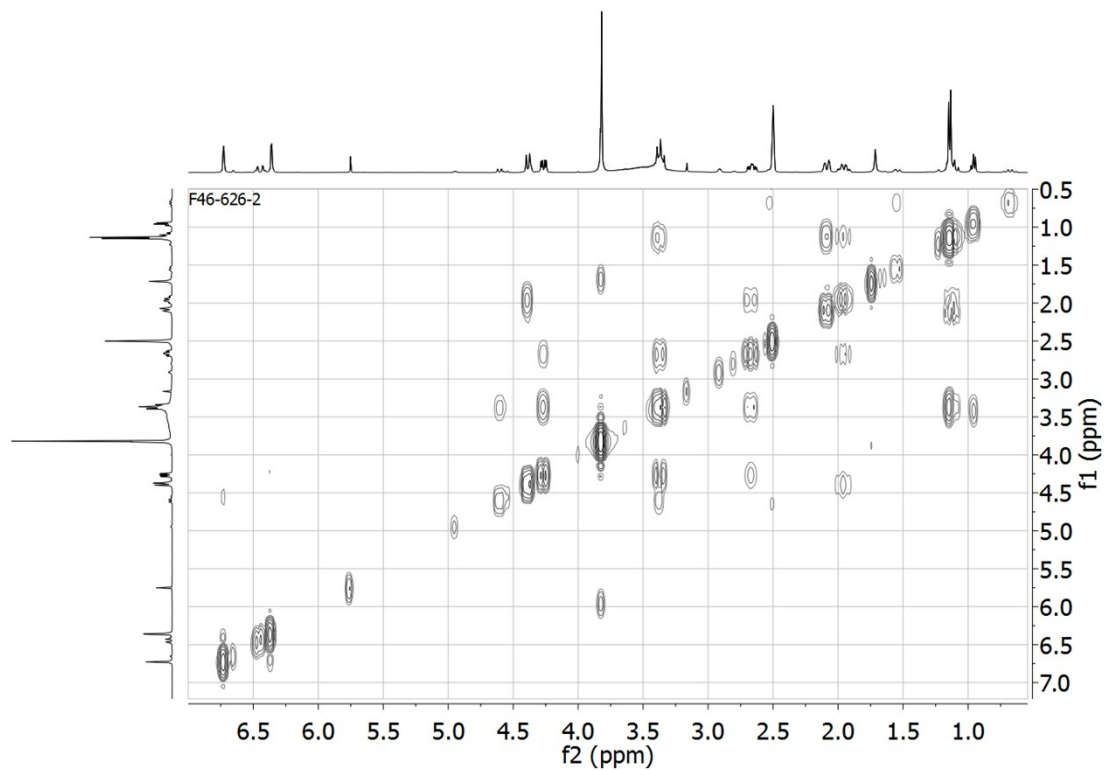

**Figure S45.**  $^1\text{H}$ - $^1\text{H}$  COSY spectrum (400 MHz) of **6** in  $\text{DMSO-}d_6$ .

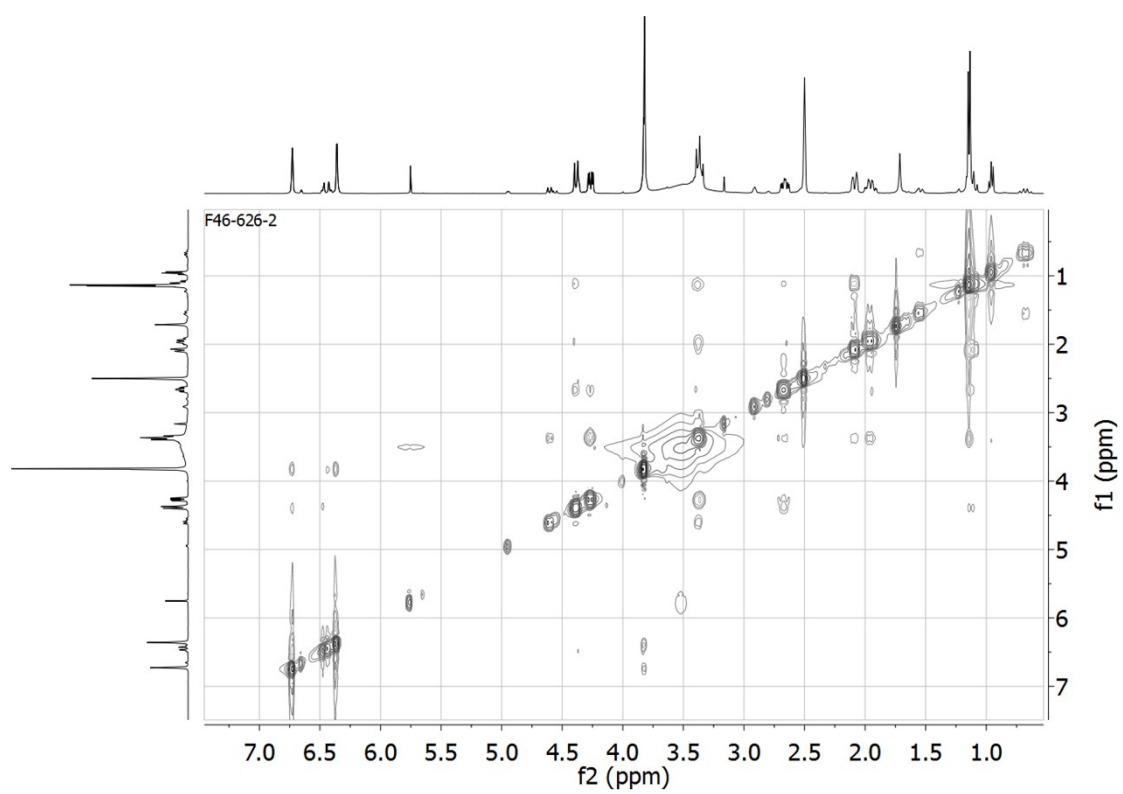

**Figure S46.** NOESY spectrum (400 MHz) of **6** in DMSO-*d*<sub>6</sub>.

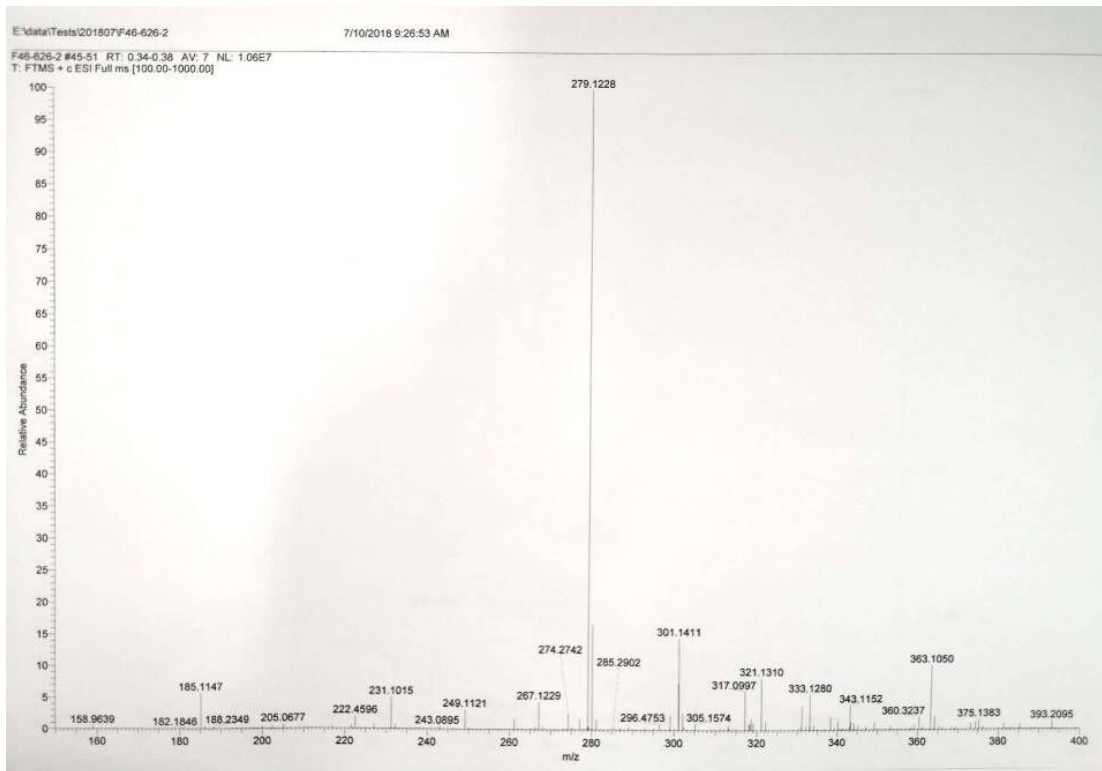

**Figure S47.** ESIHRMS spectrum of **6**.

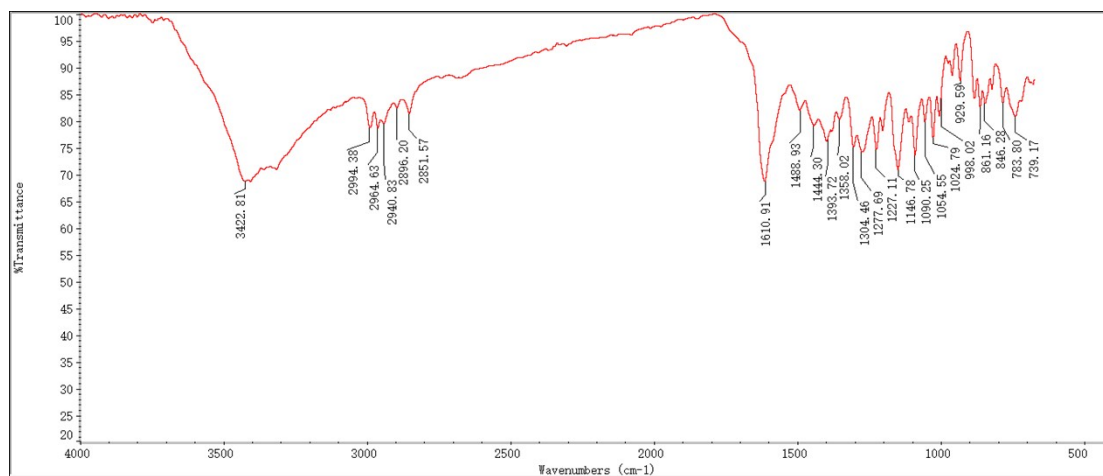

**Figure S48.** IR spectrum of **6**.

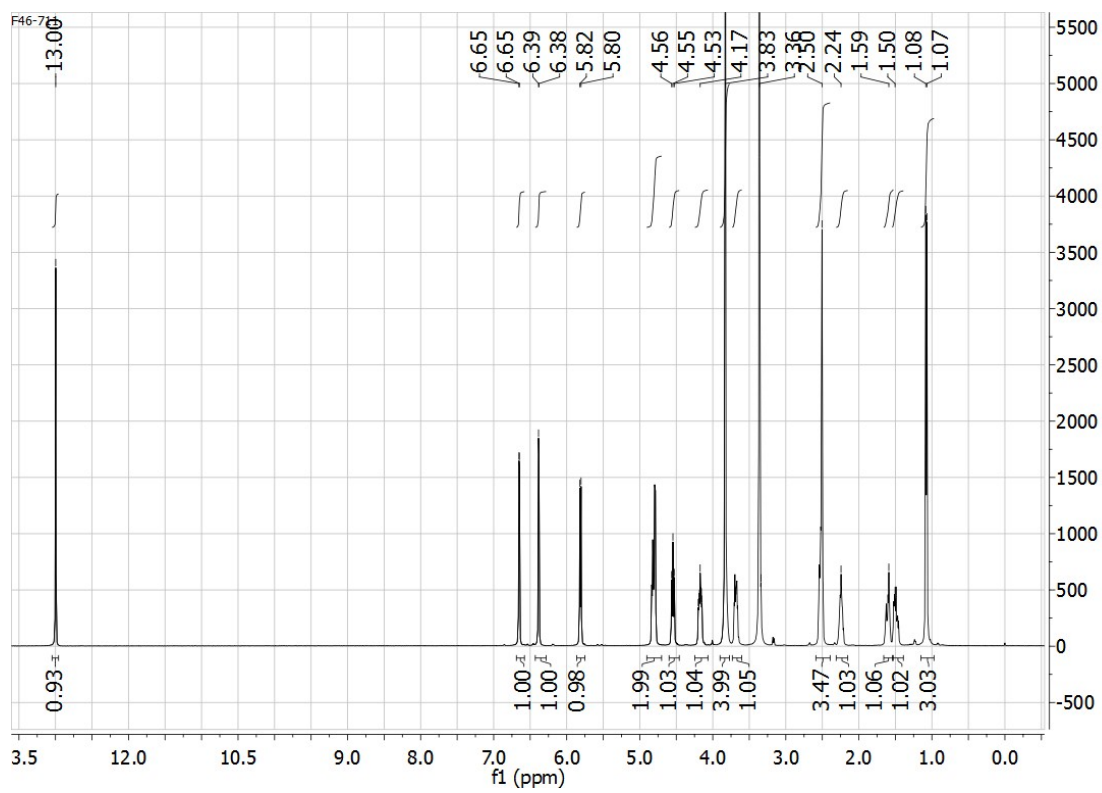

**Figure S49.**  $^1\text{H}$  NMR spectrum (400 MHz) of **7** in  $\text{DMSO-}d_6$ .

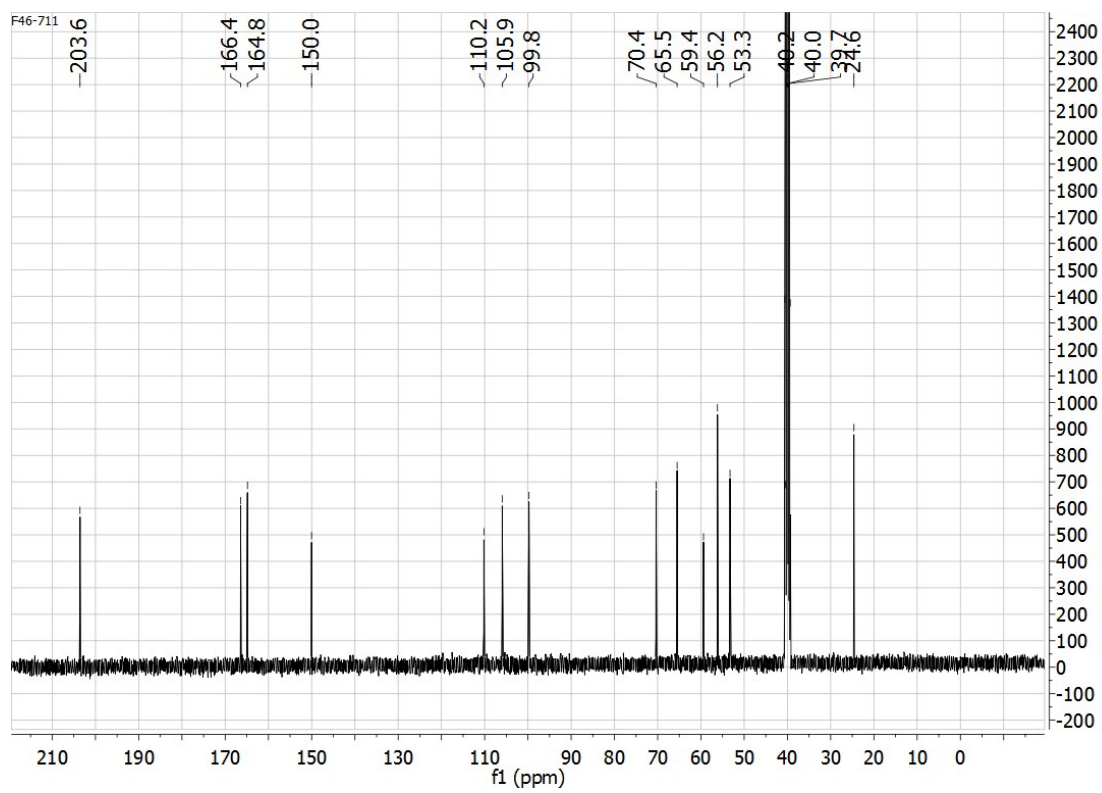

**Figure S50.** <sup>13</sup>C NMR spectrum (100 MHz) of 7 in DMSO-*d*<sub>6</sub>.

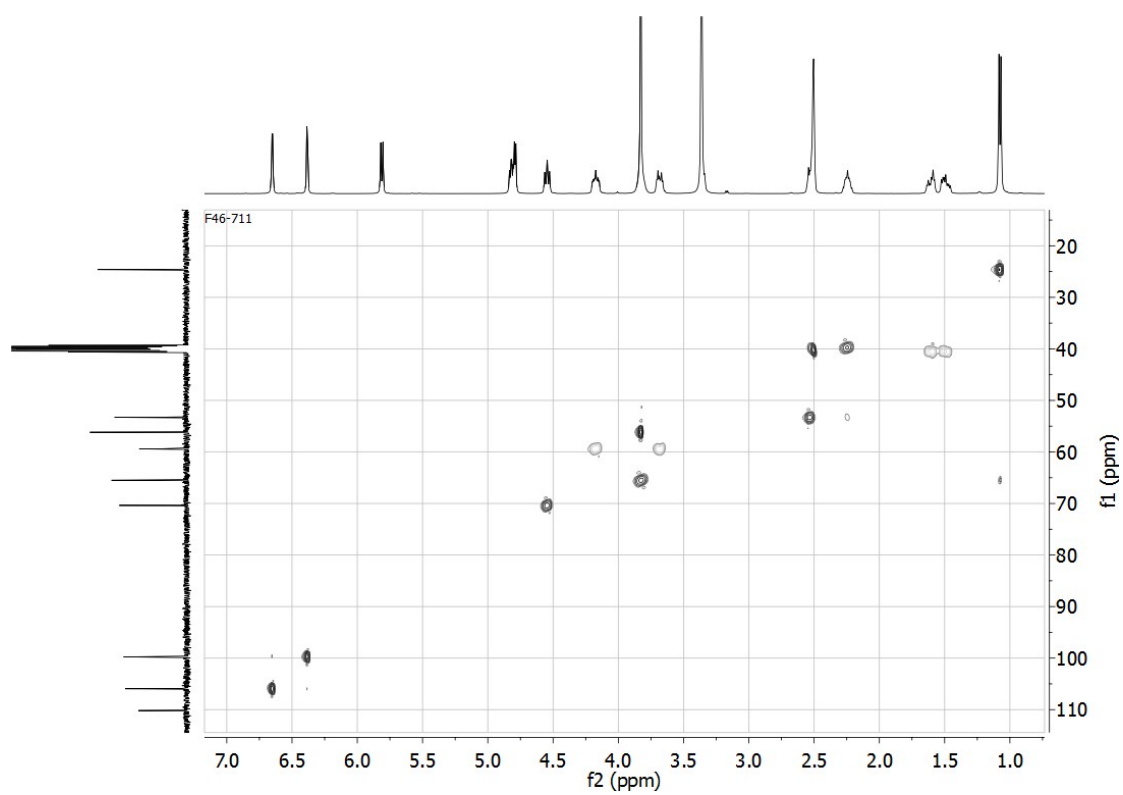

**Figure S51.** HSQC spectrum (400 MHz) of **7** in DMSO- $d_6$ .



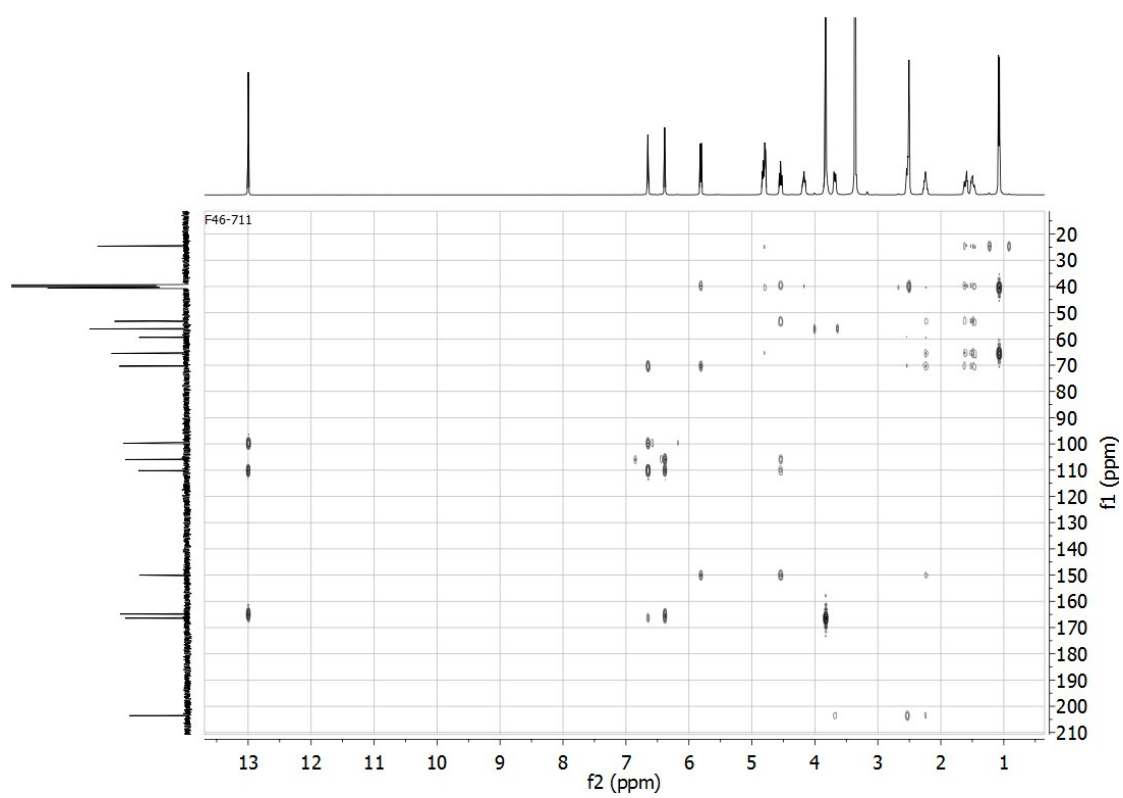

**Figure S52.** HMBC spectrum (400 MHz) of **7** in DMSO-*d*<sub>6</sub>.

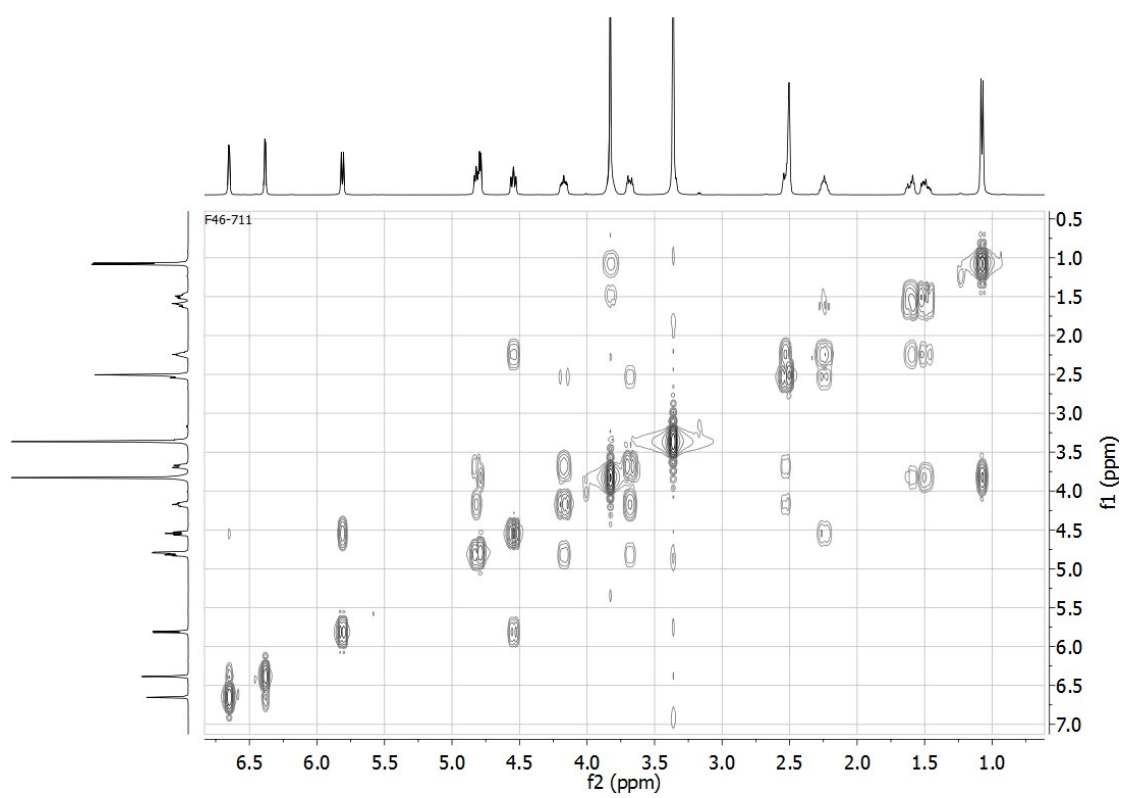

**Figure S53.**  $^1\text{H}$ - $^1\text{H}$  COSY spectrum (400 MHz) of **7** in  $\text{DMSO-}d_6$ .

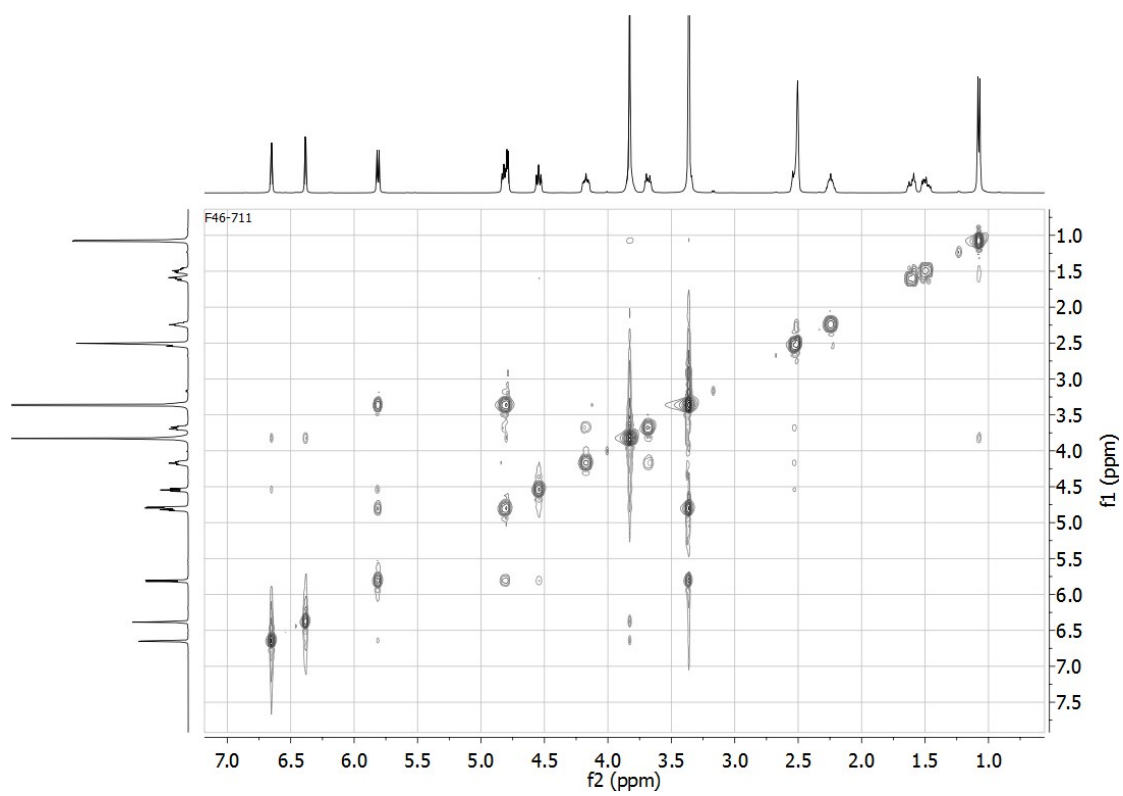

**Figure S54.** NOESY spectrum (400 MHz) of **7** in DMSO- $d_6$ .

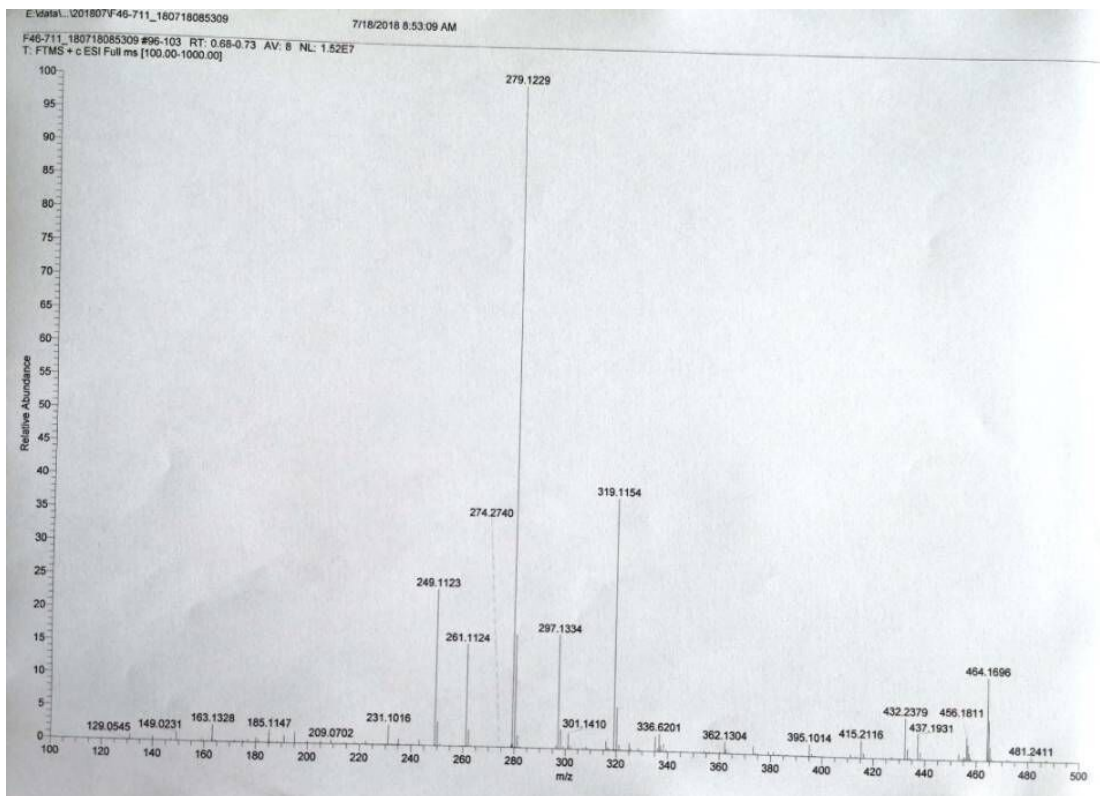

**Figure S55.** ESIHRMS spectrum of **7**.

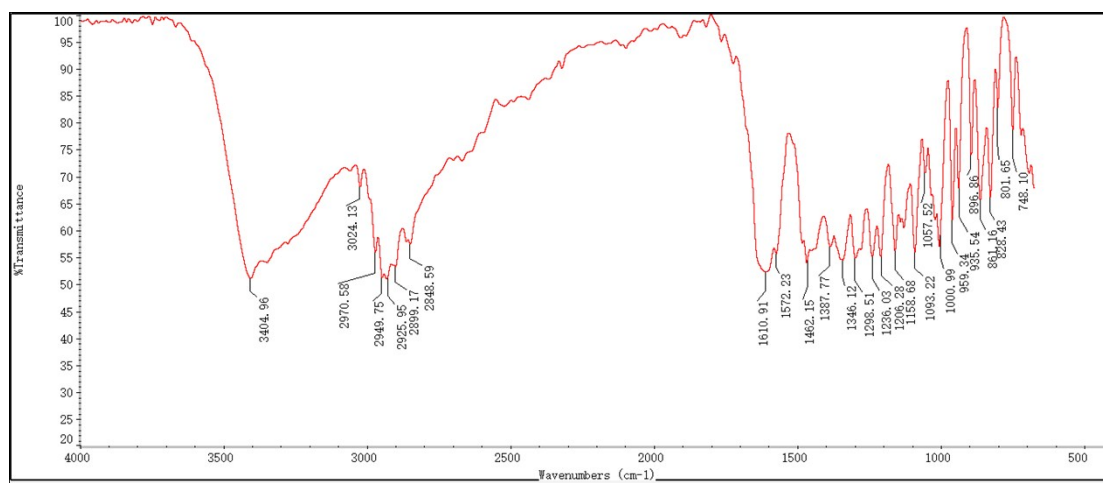

Figure S56. IR spectrum of 7.

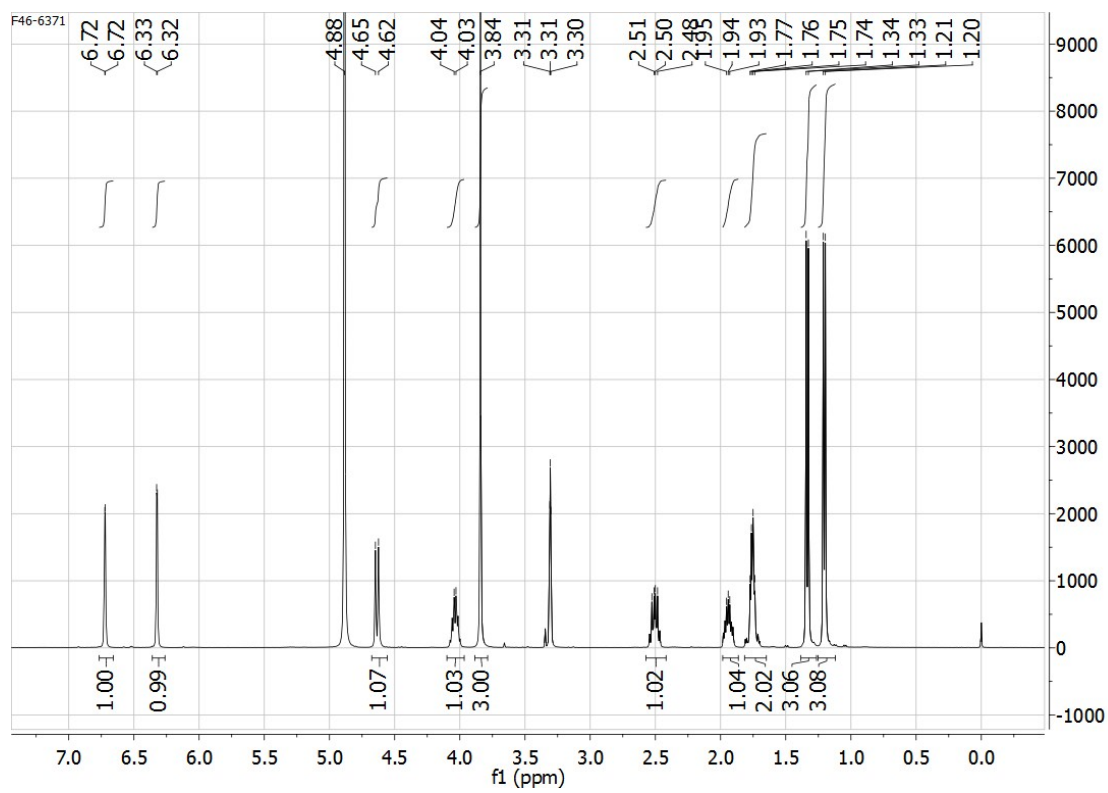

**Figure S57.**  $^1\text{H}$  NMR spectrum (400 MHz) of **8** in  $\text{CD}_3\text{OD}$ .

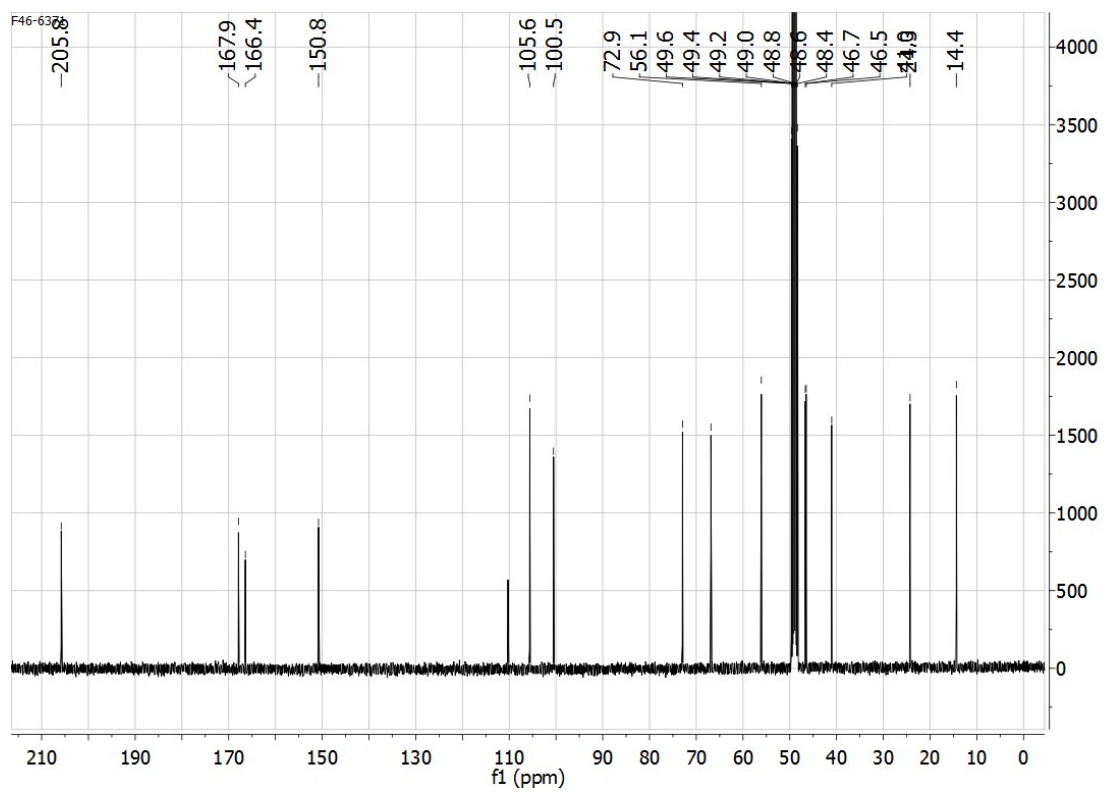

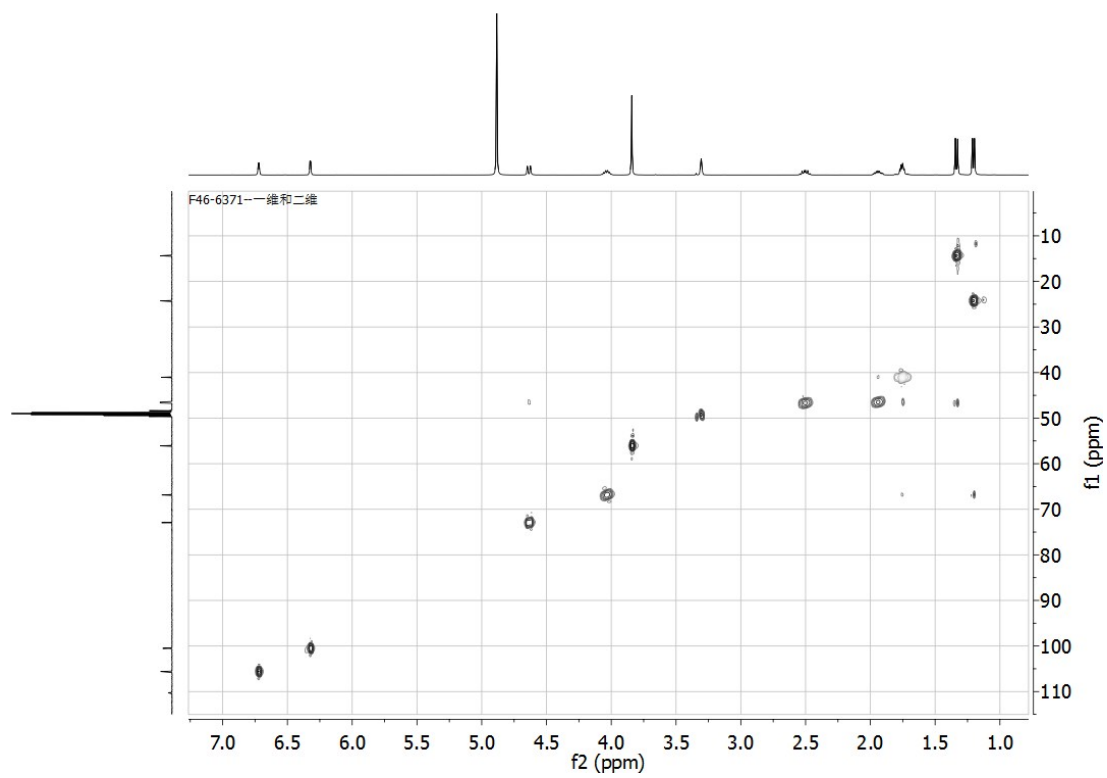

**Figure S59.** HSQC spectrum (400 MHz) of **8** in CD<sub>3</sub>OD.



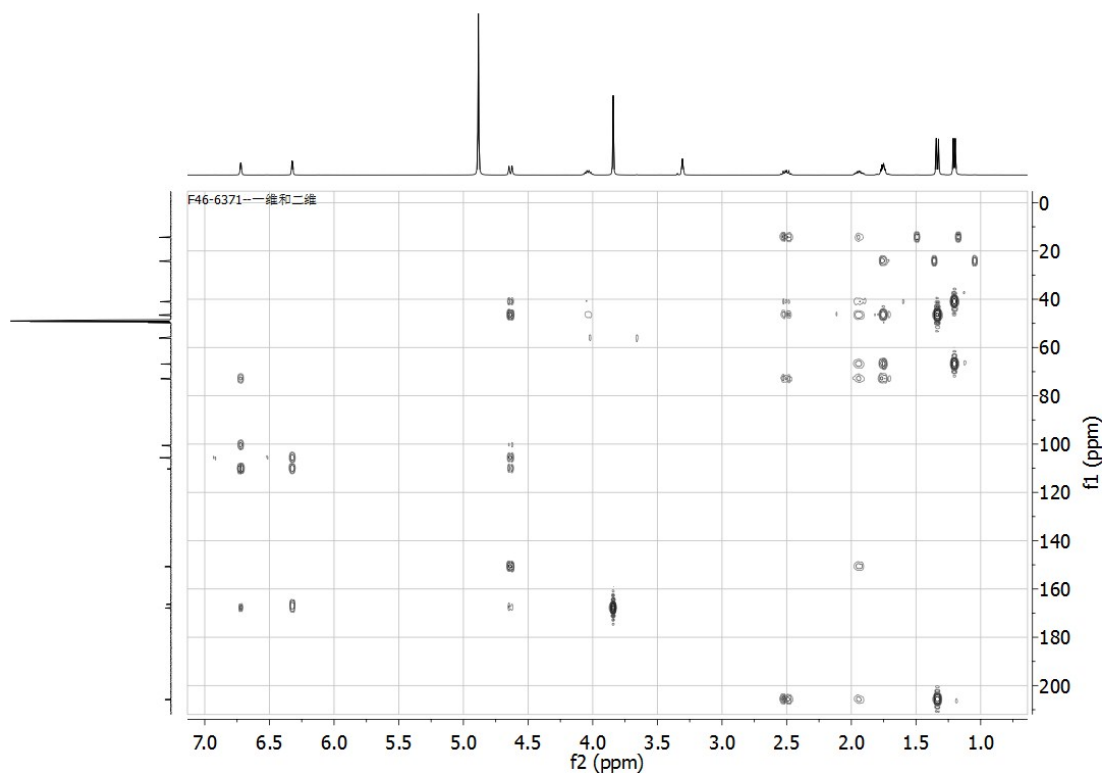

**Figure S60.** HMBC spectrum (400 MHz) of **8** in CD<sub>3</sub>OD.

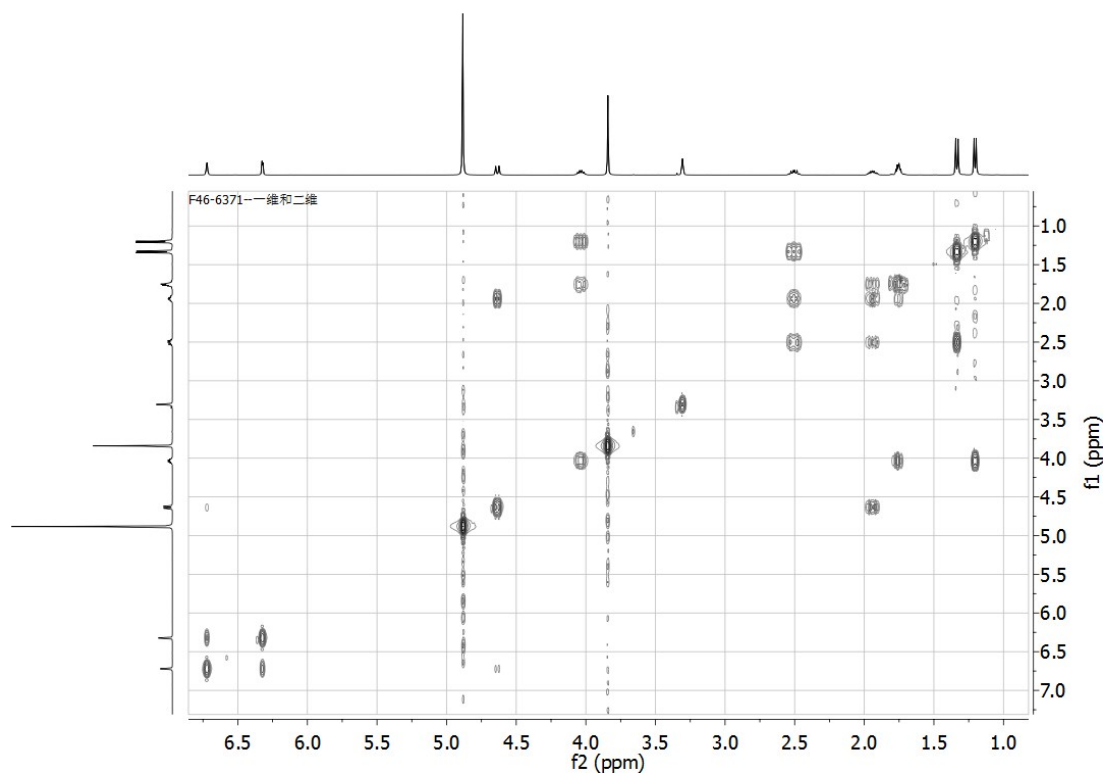

**Figure S61.**  $^1\text{H}$ - $^1\text{H}$  COSY spectrum (400 MHz) of **8** in  $\text{CD}_3\text{OD}$ .

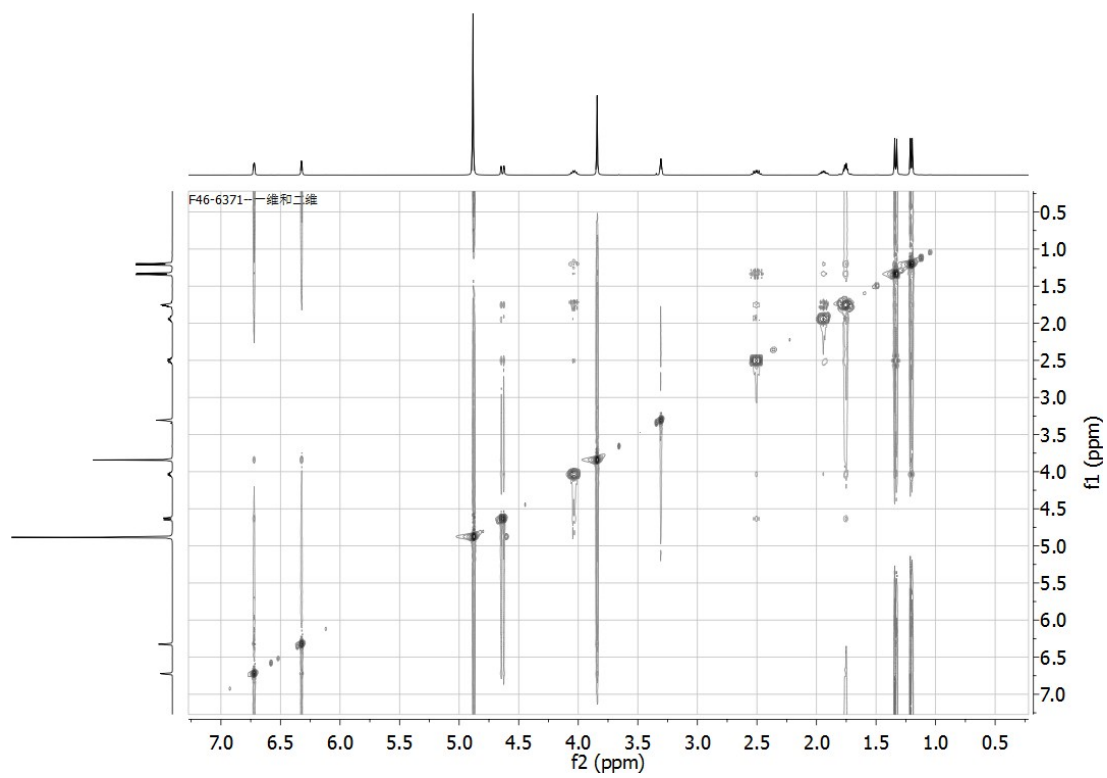

**Figure S62.** NOESY spectrum (400 MHz) of **8** in CD<sub>3</sub>OD.

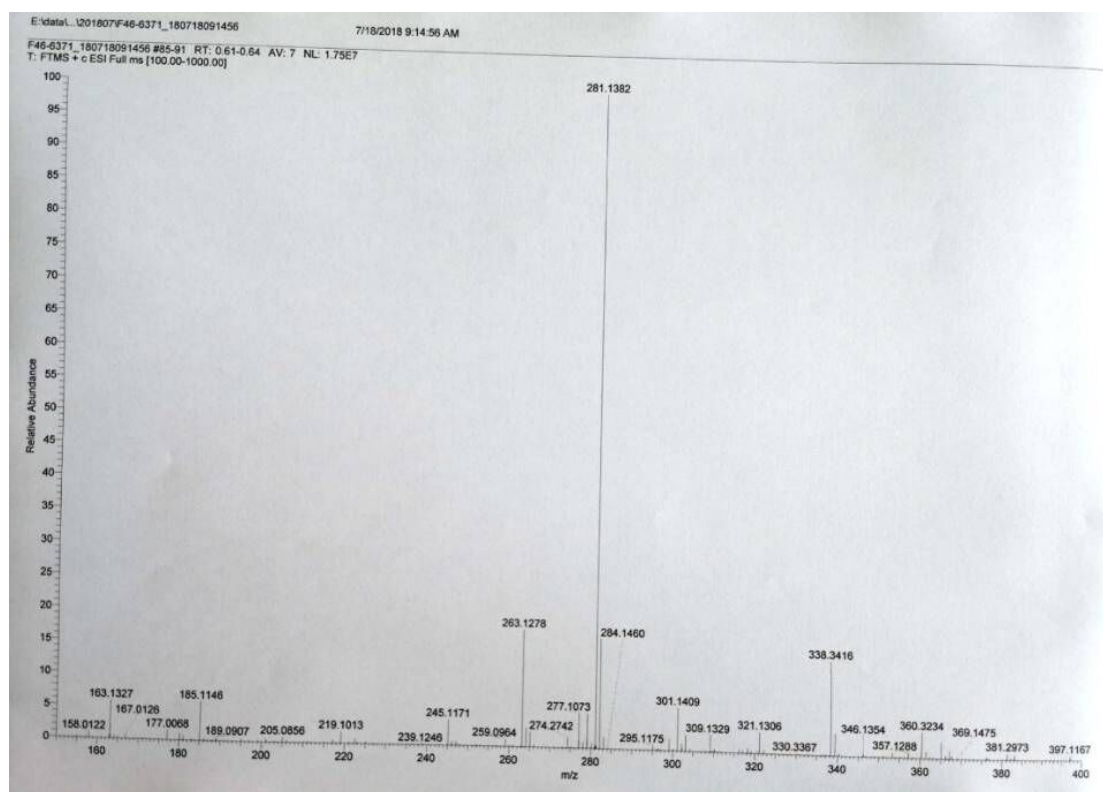

**Figure S63.** ESIHRMS spectrum of **8**.

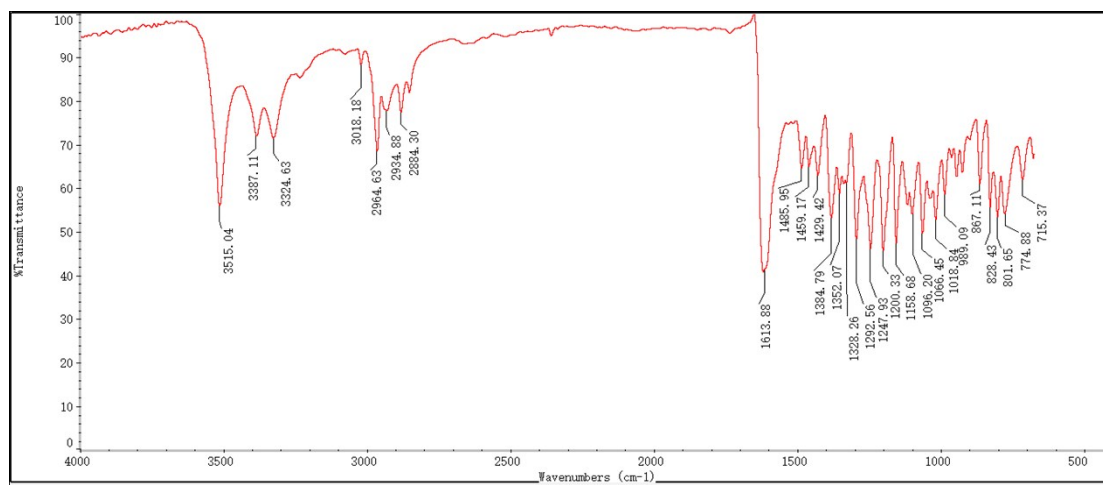

**Figure S64.** IR spectrum of **8**.

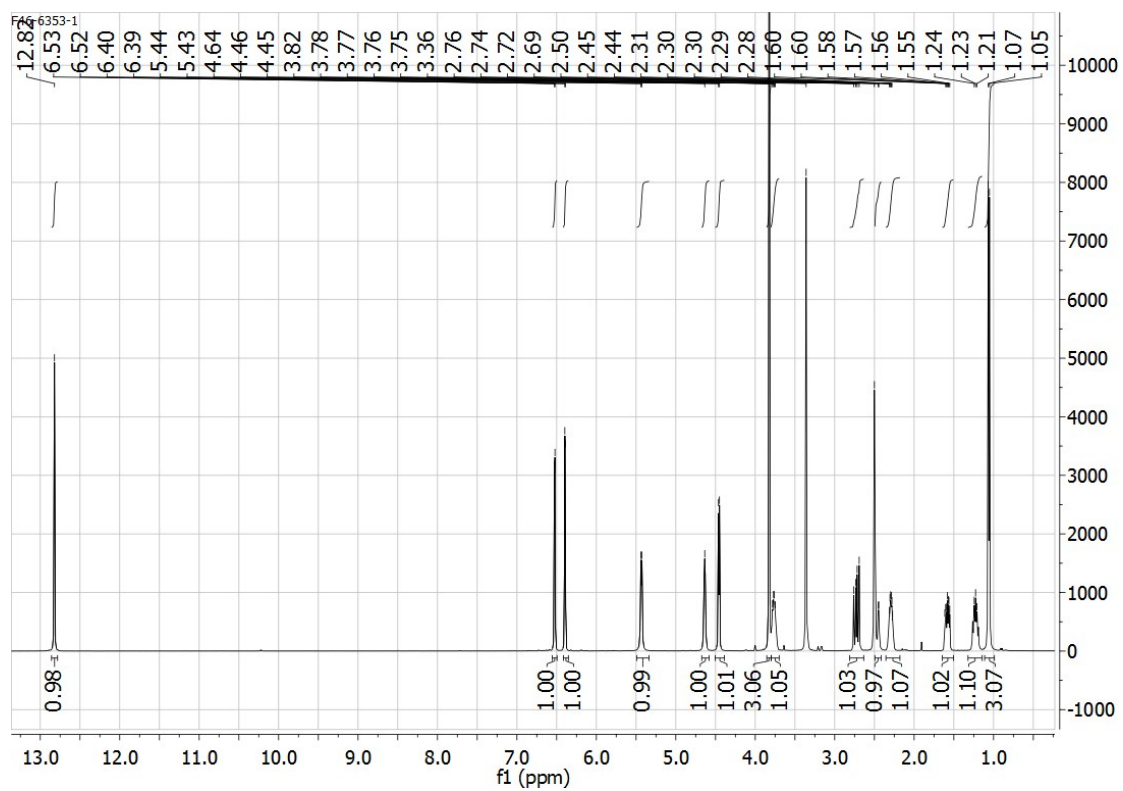

**Figure S65.**  $^1\text{H}$  NMR spectrum (400 MHz) of **9** in  $\text{DMSO-}d_6$ .

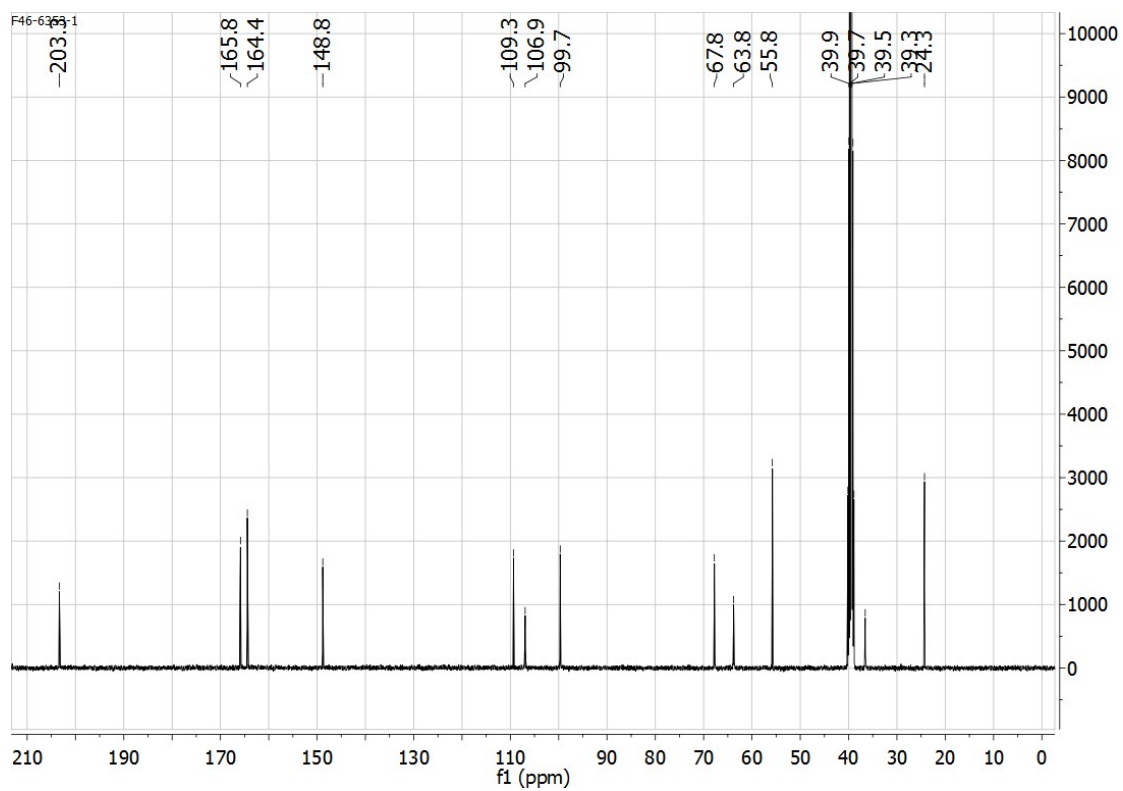

**Figure S66.**  $^{13}\text{C}$  NMR spectrum (100 MHz) of **9** in  $\text{DMSO-}d_6$ .

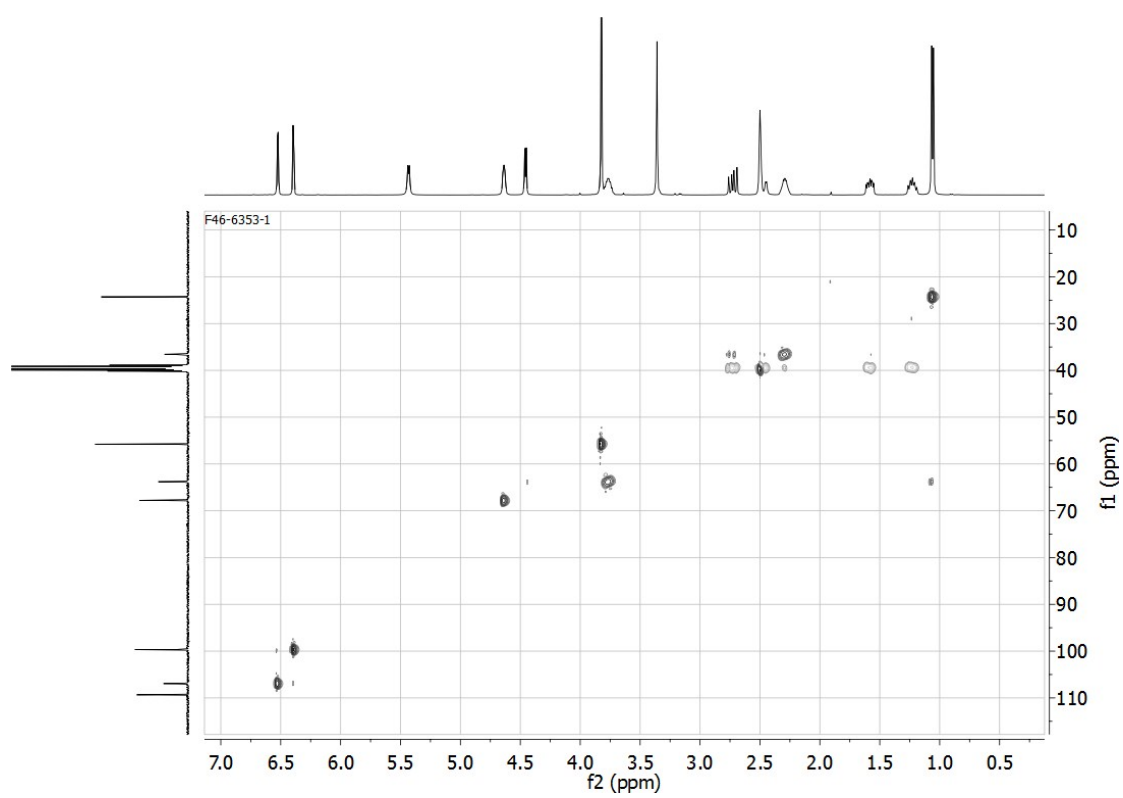

**Figure S67.** HSQC spectrum (400 MHz) of **9** in DMSO-*d*<sub>6</sub>.



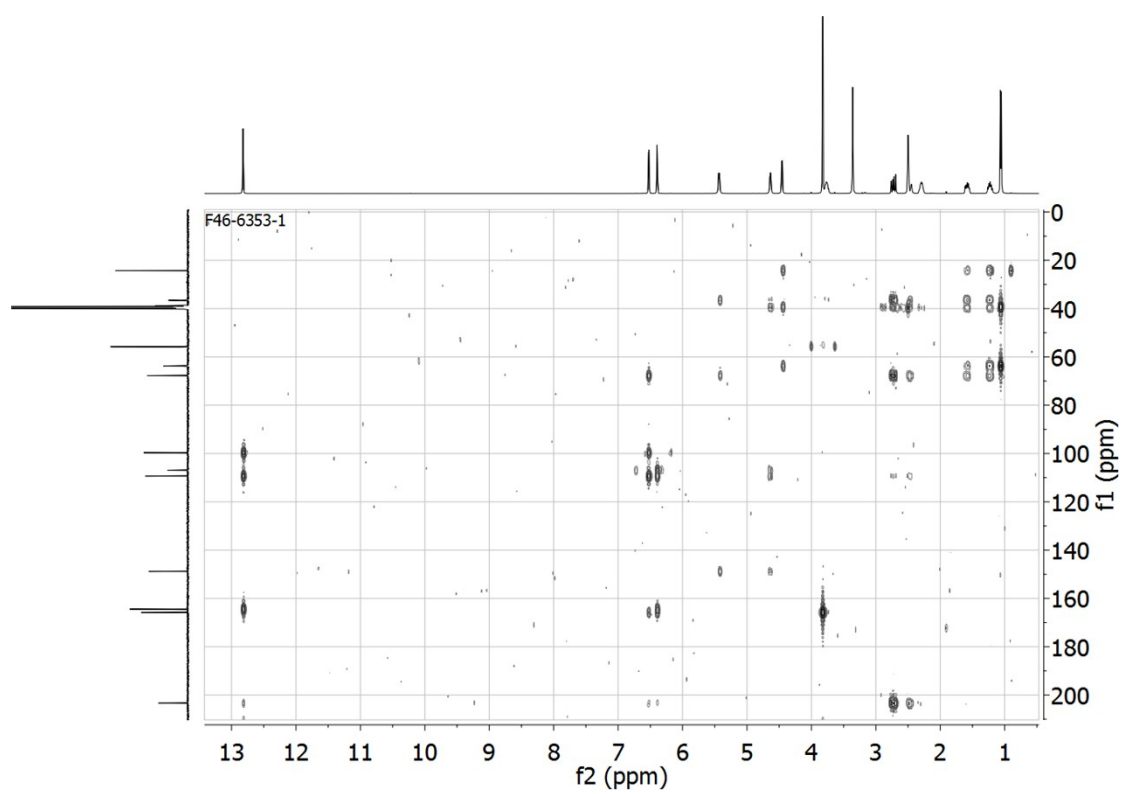

**Figure S68.** HMBC spectrum (400 MHz) of **9** in DMSO- $d_6$ .

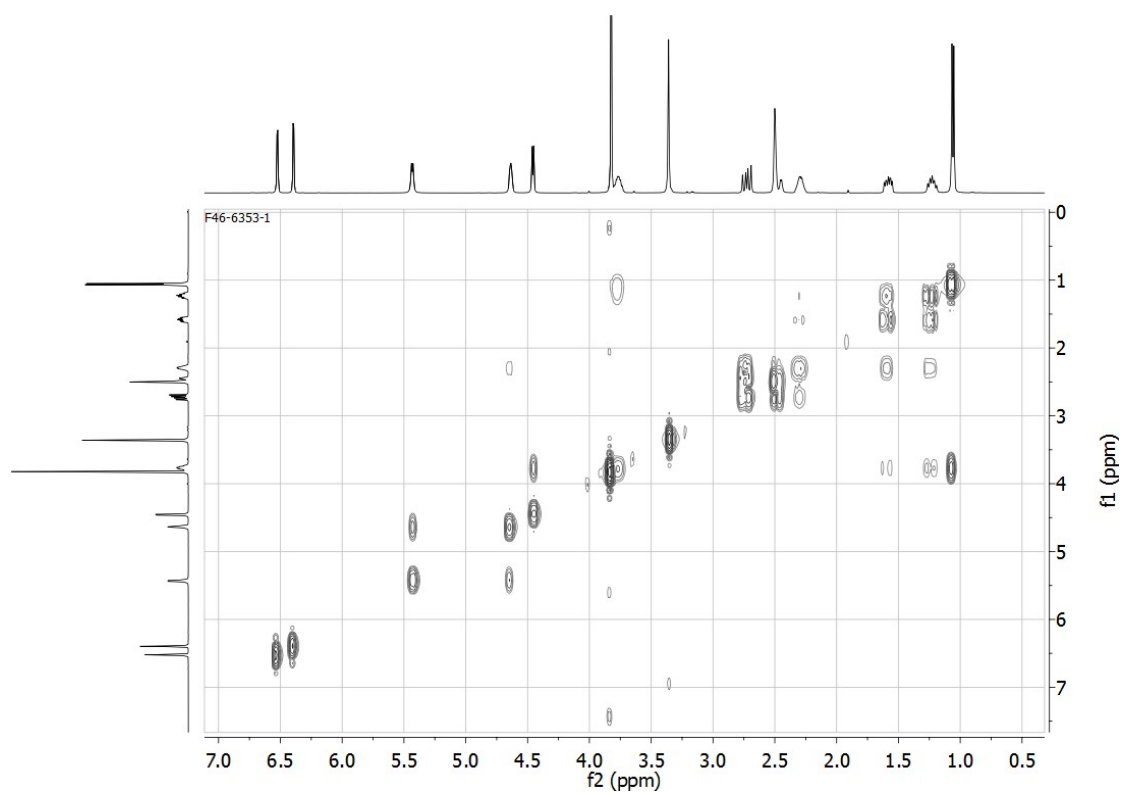

**Figure S69.**  $^1\text{H}$ - $^1\text{H}$  COSY spectrum (400 MHz) of **9** in  $\text{DMSO-}d_6$ .

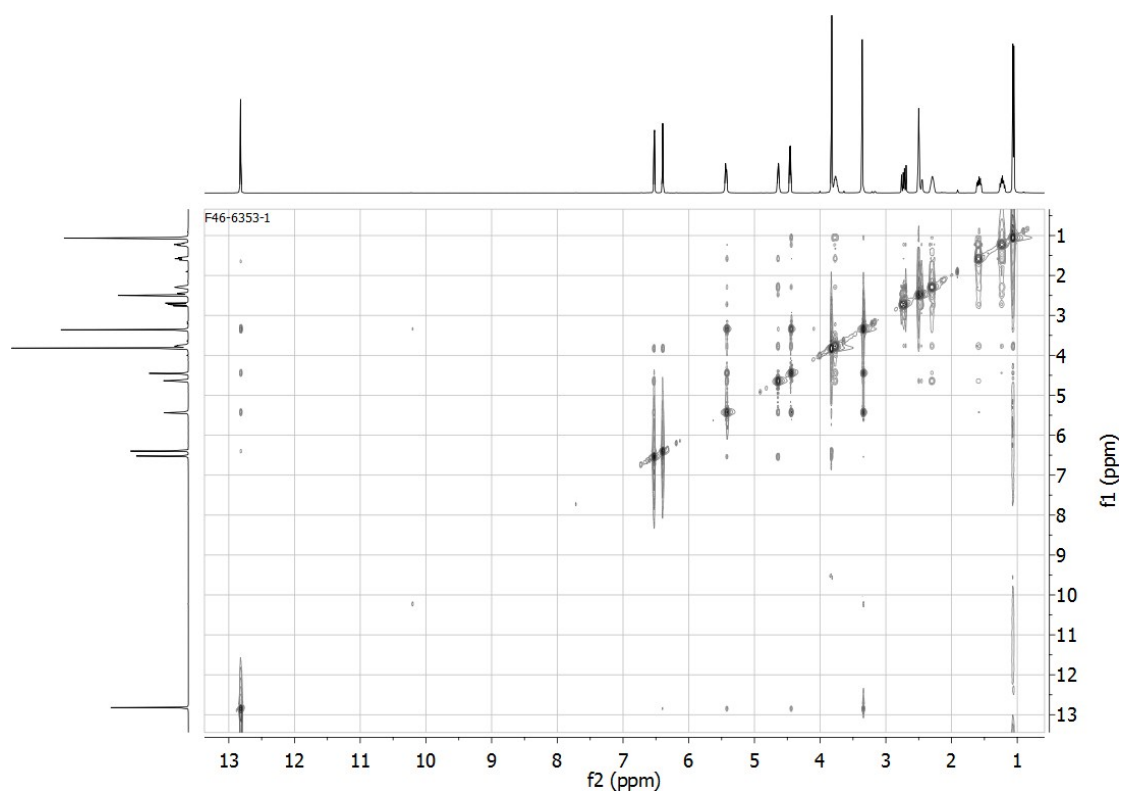

**Figure S70.** NOESY spectrum (400 MHz) of **9** in DMSO- $d_6$ .

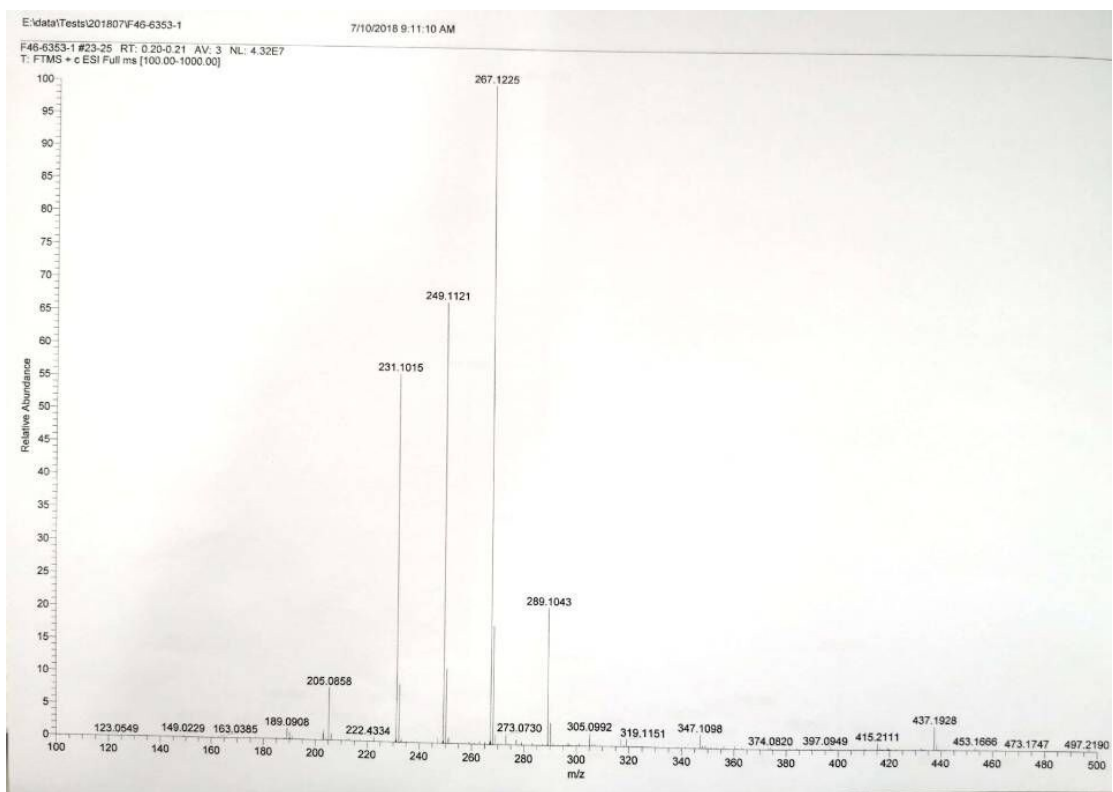

**Figure S71.** ESIHRMS spectrum of **9**.

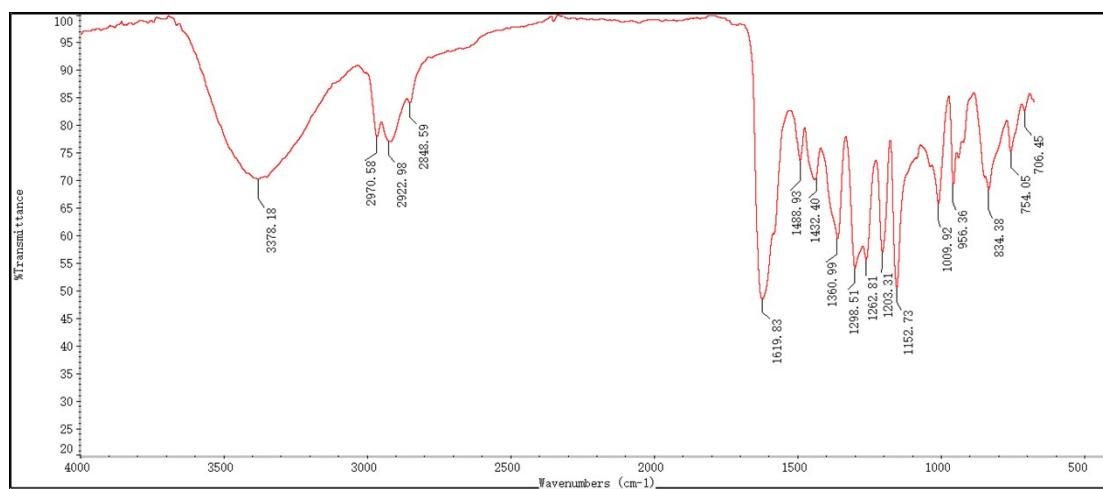

**Figure S72.** IR spectrum of **9**.

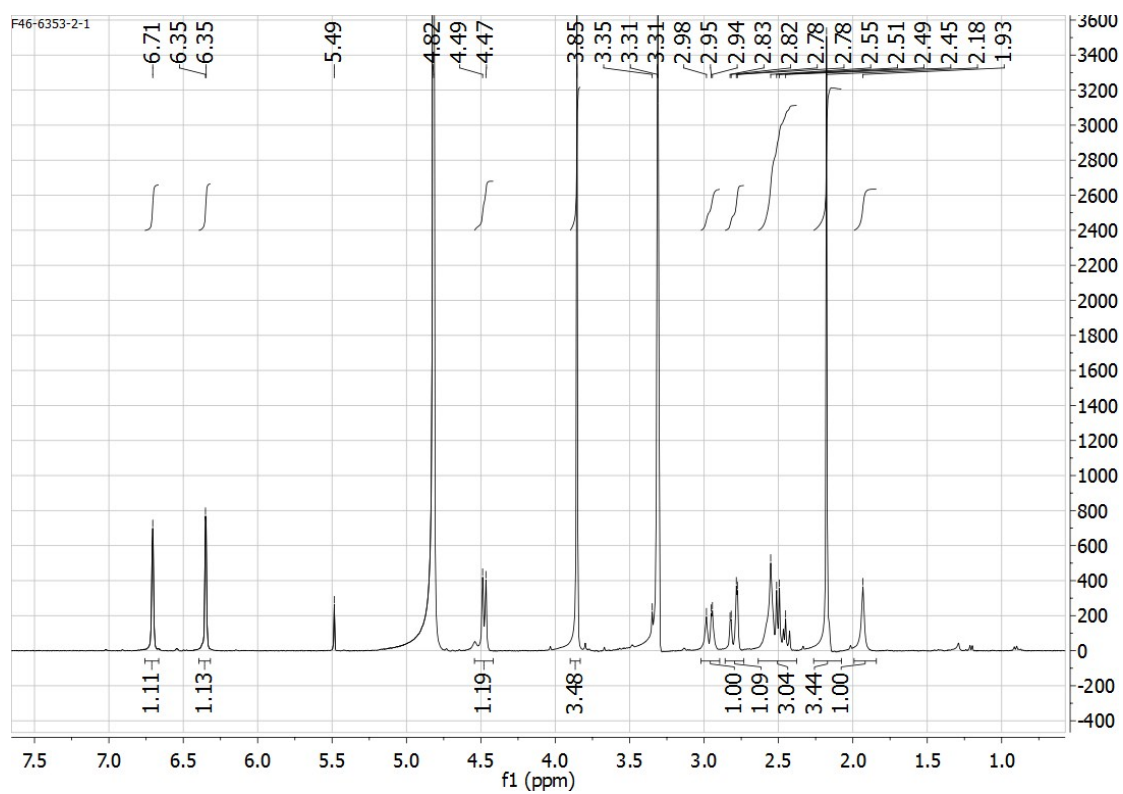

**Figure S73.**  $^1\text{H}$  NMR spectrum (400 MHz) of **10** in  $\text{CD}_3\text{OD}$ .

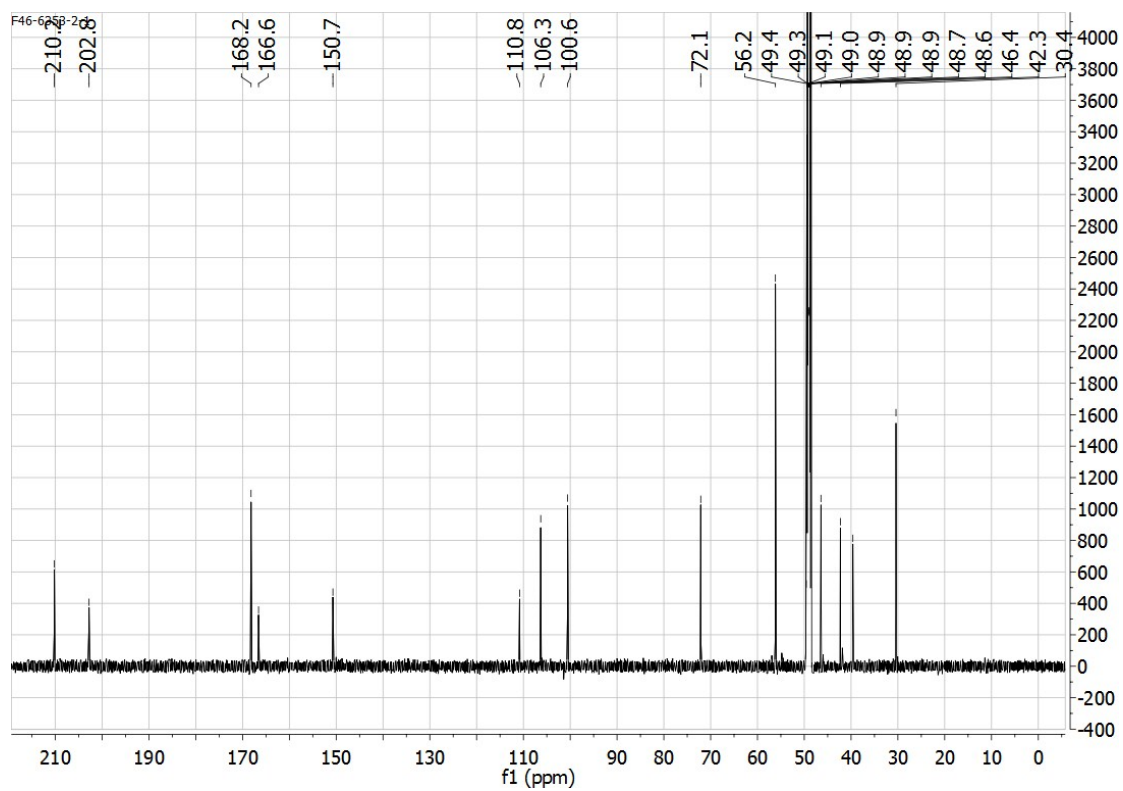

**Figure S74.** <sup>13</sup>C NMR spectrum (150 MHz) of **10** in CD<sub>3</sub>OD.

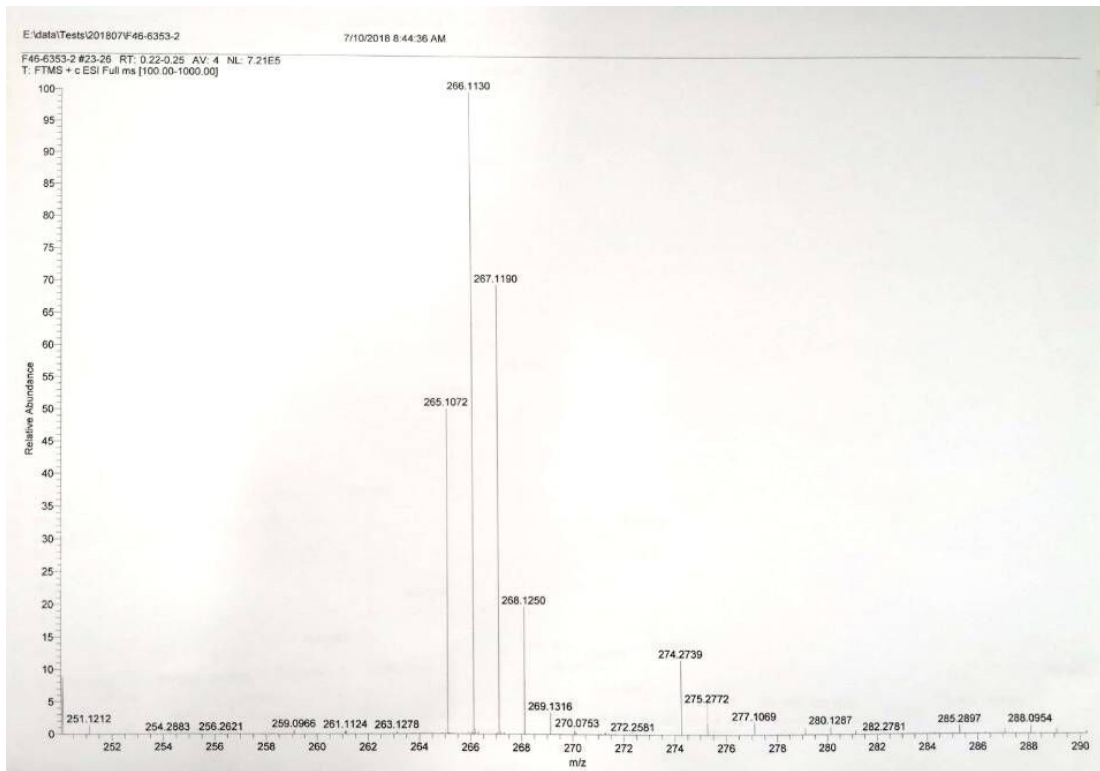

**Figure S75.** ESIHRMS spectrum of **10**.



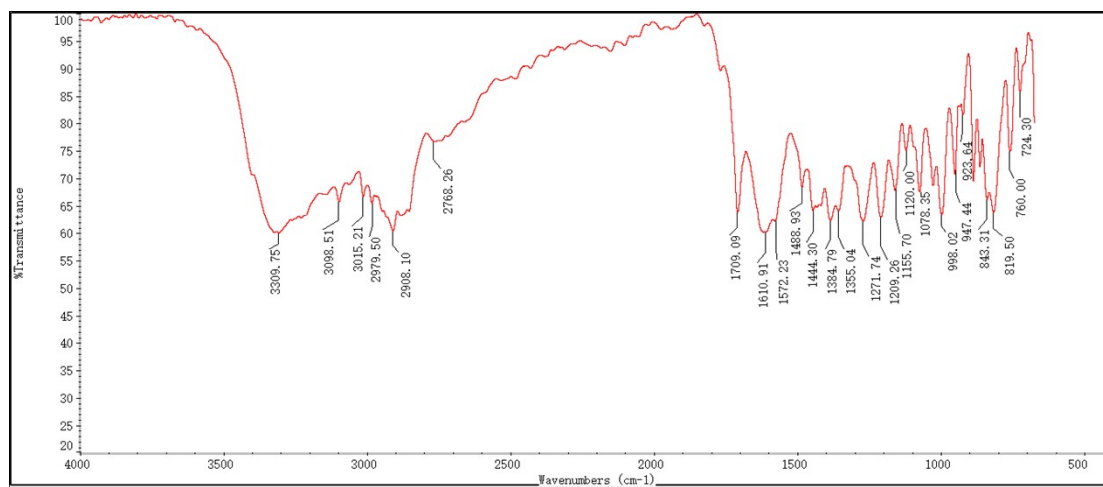

**Figure S76.** IR spectrum of **10**.

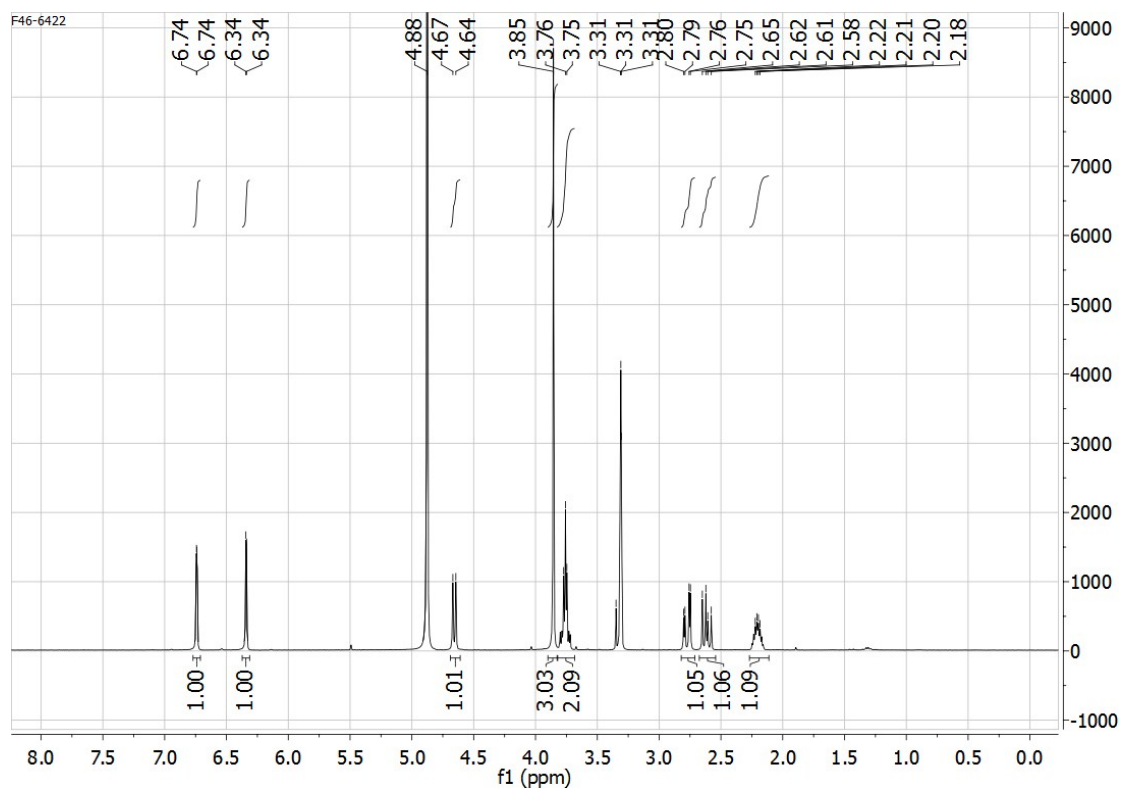

**Figure S77.**  $^1\text{H}$  NMR spectrum (400 MHz) of **11** in  $\text{CD}_3\text{OD}$ .

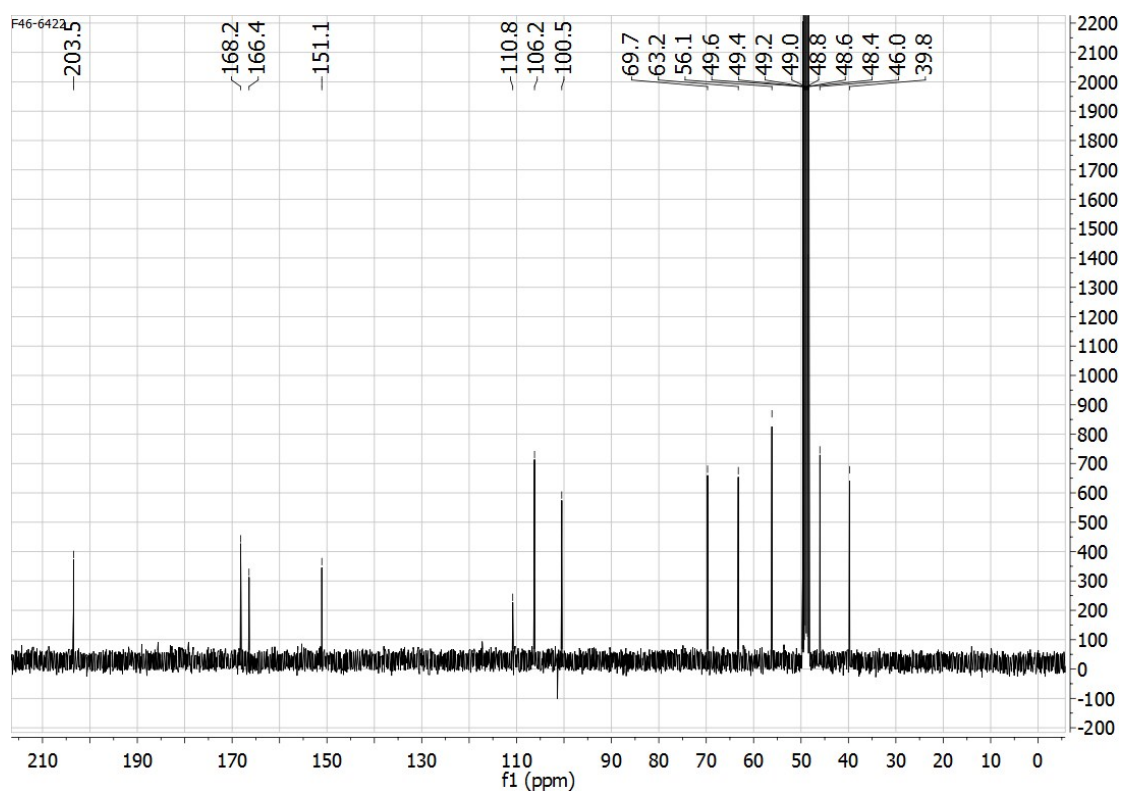

**Figure S78.** <sup>13</sup>C NMR spectrum (100 MHz) of **11** in CD<sub>3</sub>OD.

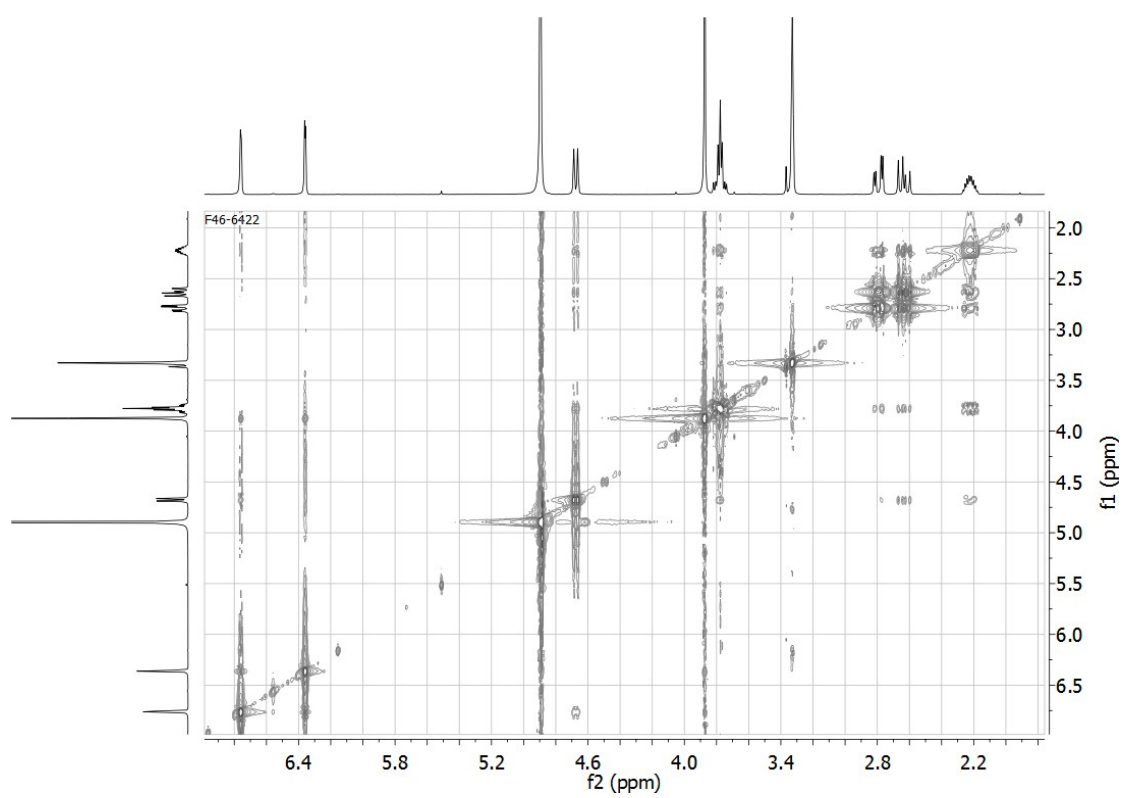

**Figure S79.** NOESY spectrum (400 MHz) of **11** in CD<sub>3</sub>OD.

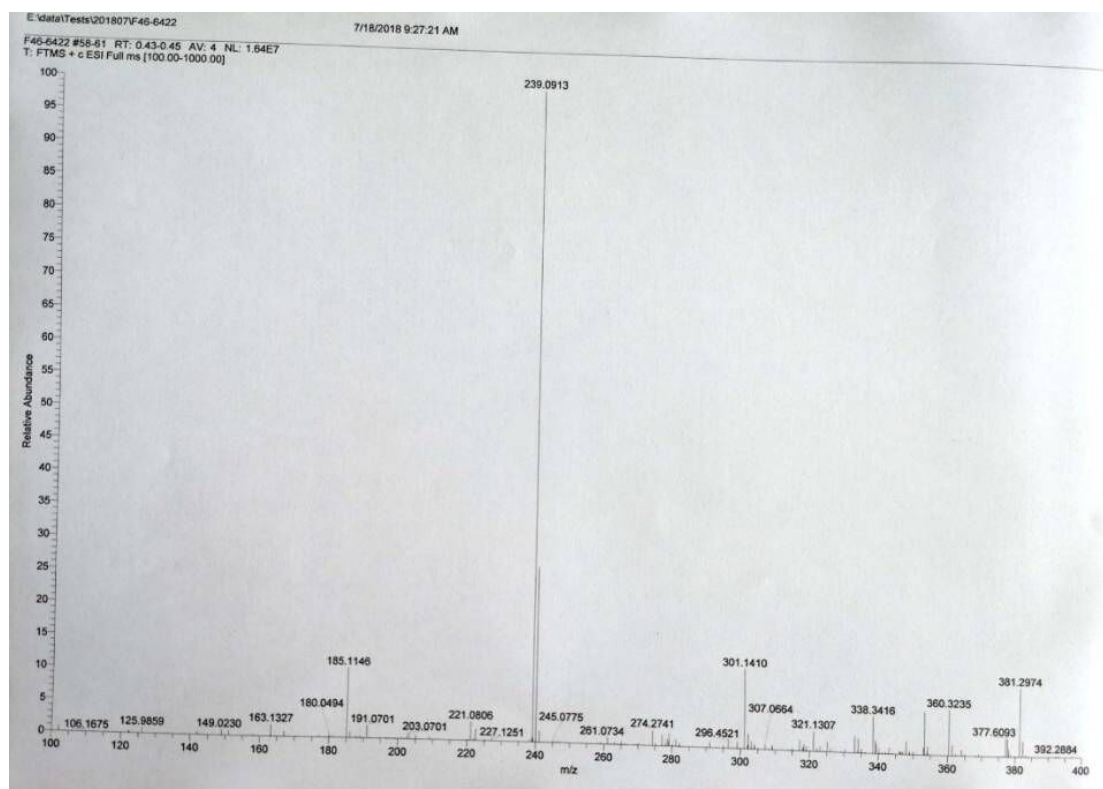

**Figure S80.** ESIHRMS spectrum of **11**.

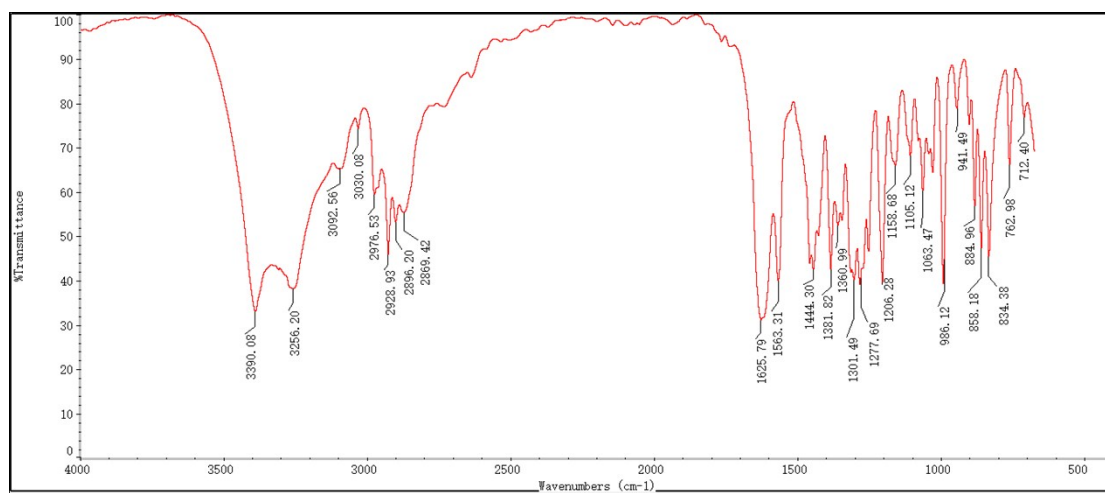

**Figure S81.** IR spectrum of **11**.

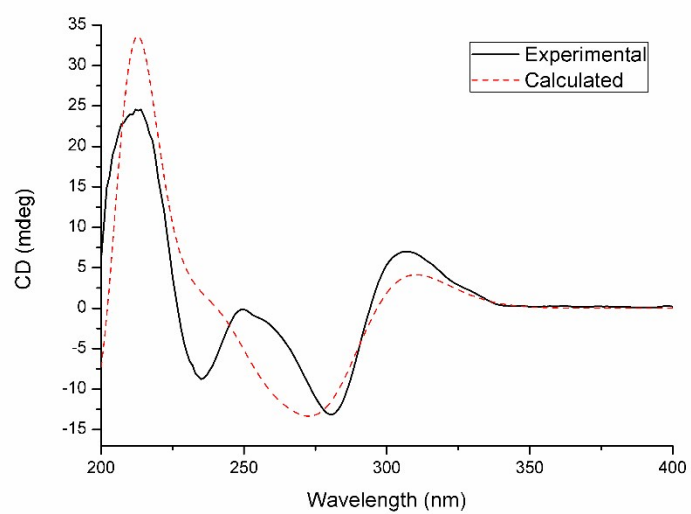

**Figure S82.** Experimental (black, solid) and calculated (red, dash) ECD curves of compound **10**.

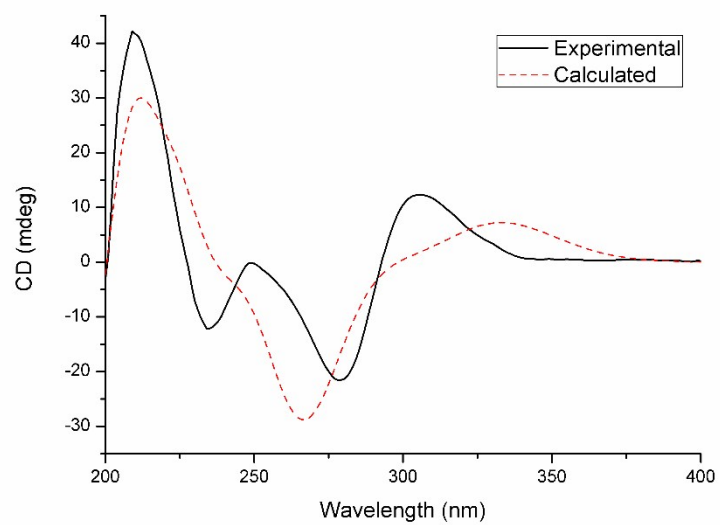

**Figure S83.** Experimental (black, solid) and calculated (red, dash) ECD curves of compound **11**.



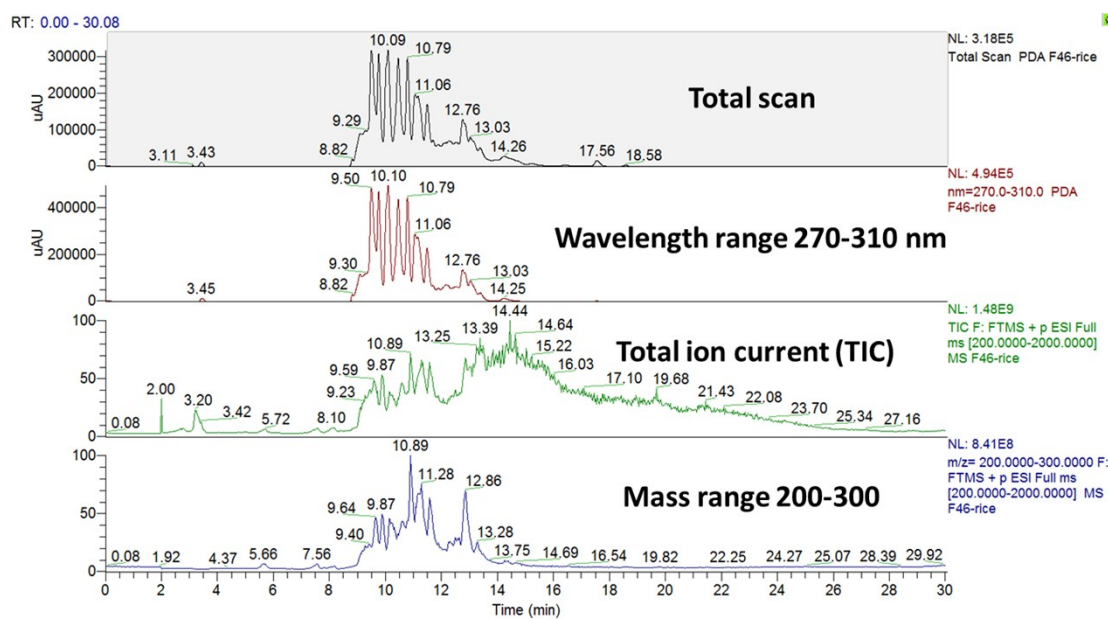

**Figure S84.** LC-ESI-HRMS analysis of the crude extract of endophytic fungus *Pleosporales* sp. F46.

**Table S1.** The antifungal and cytotoxic activities of compounds **1-11**.

| No.                            | 1          | 2    | 3    | 4    | 5    | 6    | 7                              | 8    | 9    | 10   | 11   | Fluconazole | Adriamycin                     |
|--------------------------------|------------|------|------|------|------|------|--------------------------------|------|------|------|------|-------------|--------------------------------|
| <i>Candida albicans</i> SC5314 | <b>128</b> | >128 | >128 | >128 | >128 | >128 | >128                           | >128 | >128 | >128 | >128 | <b>2.0</b>  | --                             |
| ( $\mu\text{g mL}^{-1}$ )      |            |      |      |      |      |      |                                |      |      |      |      |             |                                |
| A549 ( $\mu\text{M}$ )         | >80        | >80  | >80  | >80  | >80  | >80  | >80                            | >80  | >80  | >80  | >80  | --          | 1.5 $\pm$ 0.1                  |
| SMMC-721 ( $\mu\text{M}$ )     | >80        | >80  | >80  | >80  | >80  | >80  | >80                            | >80  | >80  | >80  | >80  | --          | 1.3 $\pm$ 0.2                  |
| MDA-MB-231 ( $\mu\text{M}$ )   | >80        | >80  | >80  | >80  | >80  | >80  | <b>22.4<math>\pm</math>1.1</b> | >80  | >80  | >80  | >80  | --          | <b>0.45<math>\pm</math>0.1</b> |
